# Supplementary material
Source: Research Square preprint supplement (doi:10.21203/rs.3.rs-8786947/v1)
Supplement: Supplementary file 2 [file beac42c2bcf705a062ea07d4.xlsx]

## Sheet: Table S1
Species	Source	Accession	Chloroplast Accession
Lolium perenne	NCBI	JX999996.1	NC_009950
Cynodon dactylon	NCBI	MK175054.1	NC_034680
Hordeum vulgare	NCBI	MN127966.1	NC_056985
Sporobolus alterniflorus	NCBI	MT471321.1	MT311317
Chrysopogon zizanioides	NCBI	MN635785.1	NC_035034
Triticum aestivum	NCBI	MW846283.1	MW889060
Thinopyrum obtusiflorum	NCBI	OK120846.1	NC_049154
Sorghum bicolor	NCBI	MZ506736.1	OR683744
Oryza sativa Indica	NCBI	OP740914.1	OP729774
Microstegium vimineum	NCBI	NC_072666.1	MT610045
Elymus magellanicus	NCBI	NC_072709.1	MZ337548
Avena longiglumis	NCBI	NC_072961.1	NC_044169
Poa pratensis	NCBI	OQ612620.1	NC_057962
Zea mays	NCBI	OR933560.1	NC_001666
Zizania latifolia	NCBI	PP035757.1	OQ790120
Eremochloa ophiuroides	NCBI	PP372606.1	NC_036716
Paspalum vaginatum	NCBI	NC_086594.1	PP072314

## Sheet: Table S2
	NCBI accession	Order	Family	tribe	Genus	Species
15	NC_087761	Poales	Bromeliaceae	Bromelioideae	Aechmea	Aechmea fasciata
343	NC_081513	Poales	Bromeliaceae	Vrieseinae	Alcantarea	Alcantarea nahoumii
428	NC_065162	Poales	Bromeliaceae	Vrieseinae	Alcantarea	Alcantarea odorata
1185	NC_026220	Poales	Bromeliaceae	Bromelioideae	Ananas	Ananas comosus
1305	MZ457322	Poales	Bromeliaceae	Ananas	Ananas comosus	Ananas comosus var. erectifolius
141	NC_085610	Poales	Bromeliaceae	Hechtioideae	Bakerantha	Bakerantha lundelliorum
383	NC_080289	Poales	Bromeliaceae	Hechtioideae	Bakerantha	Bakerantha tillandsioides
384	NC_080288	Poales	Bromeliaceae	Hechtioideae	Bakerantha	Bakerantha purpusii
342	NC_081514	Poales	Bromeliaceae	Tillandsieae	Barfussia	Barfussia wagneriana
426	NC_065163	Poales	Bromeliaceae	Tillandsieae	Barfussia	Barfussia laxissima
144	NC_085607	Poales	Bromeliaceae	Bromelioideae	Billbergia	Billbergia horrida
139	NC_085613	Poales	Bromeliaceae	Brocchinioideae	Brocchinia	Brocchinia tatei
142	NC_085609	Poales	Bromeliaceae	Brocchinioideae	Brocchinia	Brocchinia reducta
143	NC_085608	Poales	Bromeliaceae	Brocchinioideae	Brocchinia	Brocchinia paniculata
158	OQ308832	Poales	Bromeliaceae	Brocchinioideae	Brocchinia	Brocchinia micrantha
159	OQ308829	Poales	Bromeliaceae	Brocchinioideae	Brocchinia	Brocchinia acuminata
340	NC_081516	Poales	Bromeliaceae	Catopsideae	Catopsis	Catopsis paniculata
341	NC_081515	Poales	Bromeliaceae	Catopsideae	Catopsis	Catopsis nutans
425	NC_065164	Poales	Bromeliaceae	Catopsideae	Catopsis	Catopsis sessiliflora
613	NC_061333	Poales	Bromeliaceae	Bromelioideae	Cryptanthus	Cryptanthus acaulis
453	NC_065165	Poales	Bromeliaceae	Cipuropsidinae	Goudaea	Goudaea ospinae
339	NC_081604	Poales	Bromeliaceae	Tillandsieae	Guzmania	Guzmania mitis
424	NC_065166	Poales	Bromeliaceae	Tillandsieae	Guzmania	Guzmania osyana
601	NC_061345	Poales	Bromeliaceae	Tillandsieae	Guzmania	Guzmania conifera
368	NC_080304	Poales	Bromeliaceae	Hechtioideae	Hechtia	Hechtia stenopetala
369	NC_080303	Poales	Bromeliaceae	Hechtioideae	Hechtia	Hechtia schottii
370	NC_080302	Poales	Bromeliaceae	Hechtioideae	Hechtia	Hechtia rosea
371	NC_080301	Poales	Bromeliaceae	Hechtioideae	Hechtia	Hechtia pringlei
372	NC_080300	Poales	Bromeliaceae	Hechtioideae	Hechtia	Hechtia podantha
373	NC_080299	Poales	Bromeliaceae	Hechtioideae	Hechtia	Hechtia myriantha
374	NC_080298	Poales	Bromeliaceae	Hechtioideae	Hechtia	Hechtia mooreana
375	NC_080297	Poales	Bromeliaceae	Hechtioideae	Hechtia	Hechtia michoacana
376	NC_080296	Poales	Bromeliaceae	Hechtioideae	Hechtia	Hechtia matudae
377	NC_080295	Poales	Bromeliaceae	Hechtioideae	Hechtia	Hechtia iltisii
378	NC_080294	Poales	Bromeliaceae	Hechtioideae	Hechtia	Hechtia elliptica
379	NC_080293	Poales	Bromeliaceae	Hechtioideae	Hechtia	Hechtia deceptrix
380	NC_080292	Poales	Bromeliaceae	Hechtioideae	Hechtia	Hechtia confusa
381	NC_080291	Poales	Bromeliaceae	Hechtioideae	Hechtia	Hechtia colossa
382	NC_080290	Poales	Bromeliaceae	Hechtioideae	Hechtia	Hechtia aquamarina
469	NC_065167	Poales	Bromeliaceae	Tillandsieae	Lemeltonia	Lemeltonia narthecioides
338	NC_081605	Poales	Bromeliaceae	Cipuropsidinae	Lutheria	Lutheria bibeatricis
487	NC_065168	Poales	Bromeliaceae	Cipuropsidinae	Lutheria	Lutheria splendens
366	NC_080306	Poales	Bromeliaceae	Hechtioideae	Mesoamerantha	Mesoamerantha malvernii
367	NC_080305	Poales	Bromeliaceae	Hechtioideae	Mesoamerantha	Mesoamerantha guatemalensis
1266	BK061352	Poales	Bromeliaceae	Cipuropsidinae	Mezobromelia	Mezobromelia capituligera
132	NC_085611	Poales	Bromeliaceae	Navioideae	Navia	Navia igneosicola
140	NC_085612	Poales	Bromeliaceae	Pitcairnioideae	Pitcairnia	Pitcairnia atrorubens
365	NC_080307	Poales	Bromeliaceae	Pitcairnioideae	Pitcairnia	Pitcairnia breedlovei
423	NC_065169	Poales	Bromeliaceae	Tillandsieae	Pseudalcantarea	Pseudalcantarea macropetala
452	NC_065170	Poales	Bromeliaceae	Tillandsieae	Pseudalcantarea	Pseudalcantarea viridiflora
161	OQ308826	Poales	Bromeliaceae	Puyoideae	Puya	Puya raimondii
396	OQ818095	Poales	Bromeliaceae	Puyoideae	Puya	Puya mirabilis
580	NC_062154	Poales	Bromeliaceae	Puyoideae	Puya	Puya hamata
581	NC_062153	Poales	Bromeliaceae	Puyoideae	Puya	Puya macropoda
582	NC_062152	Poales	Bromeliaceae	Puyoideae	Puya	Puya hutchisonii
583	NC_062151	Poales	Bromeliaceae	Puyoideae	Puya	Puya ferruginea
584	NC_062150	Poales	Bromeliaceae	Puyoideae	Puya	Puya goudotiana
585	NC_062149	Poales	Bromeliaceae	Puyoideae	Puya	Puya santosii
586	NC_062147	Poales	Bromeliaceae	Puyoideae	Puya	Puya macrura
587	NC_062146	Poales	Bromeliaceae	Puyoideae	Puya	Puya nitida
336	NC_081607	Poales	Bromeliaceae	Tillandsieae	Racinaea	Racinaea rothschuhiana
337	NC_081606	Poales	Bromeliaceae	Tillandsieae	Racinaea	Racinaea pugiformis
1265	BK061353	Poales	Bromeliaceae	Tillandsieae	Racinaea	Racinaea ropalocarpa
334	NC_081609	Poales	Bromeliaceae	Vrieseinae	Stigmatodon	Stigmatodon plurifolius
335	NC_081608	Poales	Bromeliaceae	Vrieseinae	Stigmatodon	Stigmatodon gastinianus
192	NC_081751	Poales	Bromeliaceae	Tillandsieae	Tillandsia	Tillandsia zecheri
193	NC_081750	Poales	Bromeliaceae	Tillandsieae	Tillandsia	Tillandsia xiphioides
194	NC_081749	Poales	Bromeliaceae	Tillandsieae	Tillandsia	Tillandsia wuelfinghoffii
195	NC_081748	Poales	Bromeliaceae	Tillandsieae	Tillandsia	Tillandsia werdermannii
196	NC_081747	Poales	Bromeliaceae	Tillandsieae	Tillandsia	Tillandsia welzii
197	NC_081746	Poales	Bromeliaceae	Tillandsieae	Tillandsia	Tillandsia violacea
198	NC_081745	Poales	Bromeliaceae	Tillandsieae	Tillandsia	Tillandsia variabilis
199	NC_081744	Poales	Bromeliaceae	Tillandsieae	Tillandsia	Tillandsia ulrici
200	NC_081743	Poales	Bromeliaceae	Tillandsieae	Tillandsia	Tillandsia tricolor
202	NC_081741	Poales	Bromeliaceae	Tillandsieae	Tillandsia	Tillandsia tehuacana
203	NC_081740	Poales	Bromeliaceae	Tillandsieae	Tillandsia	Tillandsia tectorum
204	NC_081739	Poales	Bromeliaceae	Tillandsieae	Tillandsia	Tillandsia tecolometl
205	NC_081738	Poales	Bromeliaceae	Tillandsieae	Tillandsia	Tillandsia supermexicana
206	NC_081737	Poales	Bromeliaceae	Tillandsieae	Tillandsia	Tillandsia suesilliae
207	NC_081736	Poales	Bromeliaceae	Tillandsieae	Tillandsia	Tillandsia subteres
208	NC_081735	Poales	Bromeliaceae	Tillandsieae	Tillandsia	Tillandsia stricta
209	NC_081734	Poales	Bromeliaceae	Tillandsieae	Tillandsia	Tillandsia streptophylla
210	NC_081733	Poales	Bromeliaceae	Tillandsieae	Tillandsia	Tillandsia streptocarpa
211	NC_081732	Poales	Bromeliaceae	Tillandsieae	Tillandsia	Tillandsia stoltenii
212	NC_081731	Poales	Bromeliaceae	Tillandsieae	Tillandsia	Tillandsia spiraliflora
213	NC_081730	Poales	Bromeliaceae	Tillandsieae	Tillandsia	Tillandsia somnians
214	NC_081729	Poales	Bromeliaceae	Tillandsieae	Tillandsia	Tillandsia sierrajuarezensis
215	NC_081728	Poales	Bromeliaceae	Tillandsieae	Tillandsia	Tillandsia setacea
216	NC_081727	Poales	Bromeliaceae	Tillandsieae	Tillandsia	Tillandsia seleriana
217	NC_081726	Poales	Bromeliaceae	Tillandsieae	Tillandsia	Tillandsia rubroviolacea
218	NC_081725	Poales	Bromeliaceae	Tillandsieae	Tillandsia	Tillandsia rubella
219	NC_081724	Poales	Bromeliaceae	Tillandsieae	Tillandsia	Tillandsia rothii
220	NC_081723	Poales	Bromeliaceae	Tillandsieae	Tillandsia	Tillandsia roseospicata
221	NC_081722	Poales	Bromeliaceae	Tillandsieae	Tillandsia	Tillandsia roland-gosselinii
222	NC_081721	Poales	Bromeliaceae	Tillandsieae	Tillandsia	Tillandsia roezlii
223	NC_081720	Poales	Bromeliaceae	Tillandsieae	Tillandsia	Tillandsia riohondoensis
224	NC_081719	Poales	Bromeliaceae	Tillandsieae	Tillandsia	Tillandsia reversa
225	NC_081718	Poales	Bromeliaceae	Tillandsieae	Tillandsia	Tillandsia remota
226	NC_081717	Poales	Bromeliaceae	Tillandsieae	Tillandsia	Tillandsia recurvifolia
227	NC_081716	Poales	Bromeliaceae	Tillandsieae	Tillandsia	Tillandsia recurvata
228	NC_081715	Poales	Bromeliaceae	Tillandsieae	Tillandsia	Tillandsia rectangula
229	NC_081714	Poales	Bromeliaceae	Tillandsieae	Tillandsia	Tillandsia rauhii
230	NC_081713	Poales	Bromeliaceae	Tillandsieae	Tillandsia	Tillandsia quaquaflorifera
231	NC_081712	Poales	Bromeliaceae	Tillandsieae	Tillandsia	Tillandsia pseudooaxacana
232	NC_081711	Poales	Bromeliaceae	Tillandsieae	Tillandsia	Tillandsia pseudomicans
233	NC_081710	Poales	Bromeliaceae	Tillandsieae	Tillandsia	Tillandsia pseudo-floribunda
234	NC_081709	Poales	Bromeliaceae	Tillandsieae	Tillandsia	Tillandsia pseudobaileyi
235	NC_081708	Poales	Bromeliaceae	Tillandsieae	Tillandsia	Tillandsia pruinosa
236	NC_081707	Poales	Bromeliaceae	Tillandsieae	Tillandsia	Tillandsia propagulifera
237	NC_081706	Poales	Bromeliaceae	Tillandsieae	Tillandsia	Tillandsia prodigiosa
238	NC_081705	Poales	Bromeliaceae	Tillandsieae	Tillandsia	Tillandsia polystachia
240	NC_081703	Poales	Bromeliaceae	Tillandsieae	Tillandsia	Tillandsia paucifolia
241	NC_081702	Poales	Bromeliaceae	Tillandsieae	Tillandsia	Tillandsia parryi
242	NC_081701	Poales	Bromeliaceae	Tillandsieae	Tillandsia	Tillandsia paleacea
243	NC_081700	Poales	Bromeliaceae	Tillandsieae	Tillandsia	Tillandsia ovatispicata
244	NC_081699	Poales	Bromeliaceae	Tillandsieae	Tillandsia	Tillandsia oaxacana
245	NC_081698	Poales	Bromeliaceae	Tillandsieae	Tillandsia	Tillandsia nidus
246	NC_081697	Poales	Bromeliaceae	Tillandsieae	Tillandsia	Tillandsia nicolasensis
247	NC_081696	Poales	Bromeliaceae	Tillandsieae	Tillandsia	Tillandsia neglecta
248	NC_081695	Poales	Bromeliaceae	Tillandsieae	Tillandsia	Tillandsia multicaulis
249	NC_081694	Poales	Bromeliaceae	Tillandsieae	Tillandsia	Tillandsia micans
250	NC_081693	Poales	Bromeliaceae	Tillandsieae	Tillandsia	Tillandsia may-patii
251	NC_081692	Poales	Bromeliaceae	Tillandsieae	Tillandsia	Tillandsia maya
252	NC_081691	Poales	Bromeliaceae	Tillandsieae	Tillandsia	Tillandsia marnieri-lapostollei
253	NC_081690	Poales	Bromeliaceae	Tillandsieae	Tillandsia	Tillandsia makoyana
254	NC_081689	Poales	Bromeliaceae	Tillandsieae	Tillandsia	Tillandsia magnusiana
255	NC_081688	Poales	Bromeliaceae	Tillandsieae	Tillandsia	Tillandsia macrochlamys
256	NC_081687	Poales	Bromeliaceae	Tillandsieae	Tillandsia	Tillandsia machupicchuensis
257	NC_081686	Poales	Bromeliaceae	Tillandsieae	Tillandsia	Tillandsia macdougallii
258	NC_081685	Poales	Bromeliaceae	Tillandsieae	Tillandsia	Tillandsia lymanii
259	NC_081684	Poales	Bromeliaceae	Tillandsieae	Tillandsia	Tillandsia lucida
260	NC_081683	Poales	Bromeliaceae	Tillandsieae	Tillandsia	Tillandsia lotteae
261	NC_081682	Poales	Bromeliaceae	Tillandsieae	Tillandsia	Tillandsia limbata
262	NC_081681	Poales	Bromeliaceae	Tillandsieae	Tillandsia	Tillandsia leiboldiana
263	NC_081680	Poales	Bromeliaceae	Tillandsieae	Tillandsia	Tillandsia lautneri
264	NC_081679	Poales	Bromeliaceae	Tillandsieae	Tillandsia	Tillandsia divaricata
265	NC_081678	Poales	Bromeliaceae	Tillandsieae	Tillandsia	Tillandsia langlasseana
266	NC_081677	Poales	Bromeliaceae	Tillandsieae	Tillandsia	Tillandsia landbeckii
267	NC_081676	Poales	Bromeliaceae	Tillandsieae	Tillandsia	Tillandsia lajensis
268	NC_081675	Poales	Bromeliaceae	Tillandsieae	Tillandsia	Tillandsia krahnii
269	NC_081674	Poales	Bromeliaceae	Tillandsieae	Tillandsia	Tillandsia klausii
270	NC_081673	Poales	Bromeliaceae	Tillandsieae	Tillandsia	Tillandsia kirchhoffiana
271	NC_081672	Poales	Bromeliaceae	Tillandsieae	Tillandsia	Tillandsia juncea
272	NC_081671	Poales	Bromeliaceae	Tillandsieae	Tillandsia	Tillandsia joel-mandimboensis
273	NC_081670	Poales	Bromeliaceae	Tillandsieae	Tillandsia	Tillandsia jaliscomonticola
274	NC_081669	Poales	Bromeliaceae	Tillandsieae	Tillandsia	Tillandsia jaguactalensis
275	NC_081668	Poales	Bromeliaceae	Tillandsieae	Tillandsia	Tillandsia ionantha
276	NC_081667	Poales	Bromeliaceae	Tillandsieae	Tillandsia	Tillandsia intermedia
277	NC_081666	Poales	Bromeliaceae	Tillandsieae	Tillandsia	Tillandsia inopinata
278	NC_081665	Poales	Bromeliaceae	Tillandsieae	Tillandsia	Tillandsia incarnata
279	NC_081664	Poales	Bromeliaceae	Tillandsieae	Tillandsia	Tillandsia hubertiana
280	NC_081663	Poales	Bromeliaceae	Tillandsieae	Tillandsia	Tillandsia huarazensis
281	NC_081662	Poales	Bromeliaceae	Tillandsieae	Tillandsia	Tillandsia hondurensis
282	NC_081661	Poales	Bromeliaceae	Tillandsieae	Tillandsia	Tillandsia hintoniana
283	NC_081660	Poales	Bromeliaceae	Tillandsieae	Tillandsia	Tillandsia hildae
284	NC_081659	Poales	Bromeliaceae	Tillandsieae	Tillandsia	Tillandsia heterophylla
285	NC_081658	Poales	Bromeliaceae	Tillandsieae	Tillandsia	Tillandsia heliconioides
286	NC_081657	Poales	Bromeliaceae	Tillandsieae	Tillandsia	Tillandsia harrisii
287	NC_081656	Poales	Bromeliaceae	Tillandsieae	Tillandsia	Tillandsia hammeri
288	NC_081655	Poales	Bromeliaceae	Tillandsieae	Tillandsia	Tillandsia grossispicata
289	NC_081654	Poales	Bromeliaceae	Tillandsieae	Tillandsia	Tillandsia geminiflora
290	NC_081653	Poales	Bromeliaceae	Tillandsieae	Tillandsia	Tillandsia gardneri
291	NC_081652	Poales	Bromeliaceae	Tillandsieae	Tillandsia	Tillandsia funckiana
292	NC_081651	Poales	Bromeliaceae	Tillandsieae	Tillandsia	Tillandsia fuchsii
293	NC_081650	Poales	Bromeliaceae	Tillandsieae	Tillandsia	Tillandsia floribunda
294	NC_081649	Poales	Bromeliaceae	Tillandsieae	Tillandsia	Tillandsia filifolia
295	NC_081648	Poales	Bromeliaceae	Tillandsieae	Tillandsia	Tillandsia fasciculata
296	NC_081647	Poales	Bromeliaceae	Tillandsieae	Tillandsia	Tillandsia extensa
297	NC_081646	Poales	Bromeliaceae	Tillandsieae	Tillandsia	Tillandsia esseriana
298	NC_081645	Poales	Bromeliaceae	Tillandsieae	Tillandsia	Tillandsia erubescens
299	NC_081644	Poales	Bromeliaceae	Tillandsieae	Tillandsia	Tillandsia eistetteri
300	NC_081643	Poales	Bromeliaceae	Tillandsieae	Tillandsia	Tillandsia ehlersiana
301	NC_081642	Poales	Bromeliaceae	Tillandsieae	Tillandsia	Tillandsia dugesii
302	NC_081641	Poales	Bromeliaceae	Tillandsieae	Tillandsia	Tillandsia denudata
303	NC_081640	Poales	Bromeliaceae	Tillandsieae	Tillandsia	Tillandsia dasyliriifolia
304	NC_081639	Poales	Bromeliaceae	Tillandsieae	Tillandsia	Tillandsia cossoni
305	NC_081638	Poales	Bromeliaceae	Tillandsieae	Tillandsia	Tillandsia copanensis
306	NC_081637	Poales	Bromeliaceae	Tillandsieae	Tillandsia	Tillandsia copalaensis
307	NC_081636	Poales	Bromeliaceae	Tillandsieae	Tillandsia	Tillandsia concolor
308	NC_081635	Poales	Bromeliaceae	Tillandsieae	Tillandsia	Tillandsia complanata
309	NC_081634	Poales	Bromeliaceae	Tillandsieae	Tillandsia	Tillandsia circinnatioides
310	NC_081633	Poales	Bromeliaceae	Tillandsieae	Tillandsia	Tillandsia chapalillaensis
311	NC_081632	Poales	Bromeliaceae	Tillandsieae	Tillandsia	Tillandsia chaetophylla
312	NC_081631	Poales	Bromeliaceae	Tillandsieae	Tillandsia	Tillandsia cees-goudae
313	NC_081630	Poales	Bromeliaceae	Tillandsieae	Tillandsia	Tillandsia cauligera
314	NC_081629	Poales	Bromeliaceae	Tillandsieae	Tillandsia	Tillandsia caulescens
315	NC_081628	Poales	Bromeliaceae	Tillandsieae	Tillandsia	Tillandsia carlos-hankii
316	NC_081627	Poales	Bromeliaceae	Tillandsieae	Tillandsia	Tillandsia cardenasii
317	NC_081626	Poales	Bromeliaceae	Tillandsieae	Tillandsia	Tillandsia caput-medusae
318	NC_081625	Poales	Bromeliaceae	Tillandsieae	Tillandsia	Tillandsia capitata
319	NC_081624	Poales	Bromeliaceae	Tillandsieae	Tillandsia	Tillandsia calothyrsus
320	NC_081623	Poales	Bromeliaceae	Tillandsieae	Tillandsia	Tillandsia caliginosa
321	NC_081622	Poales	Bromeliaceae	Tillandsieae	Tillandsia	Tillandsia bourgaei
322	NC_081621	Poales	Bromeliaceae	Tillandsieae	Tillandsia	Tillandsia botterii
323	NC_081620	Poales	Bromeliaceae	Tillandsieae	Tillandsia	Tillandsia bochilensis
324	NC_081619	Poales	Bromeliaceae	Tillandsieae	Tillandsia	Tillandsia bartramii
325	NC_081618	Poales	Bromeliaceae	Tillandsieae	Tillandsia	Tillandsia balbisiana
326	NC_081617	Poales	Bromeliaceae	Tillandsieae	Tillandsia	Tillandsia arroyoensis
327	NC_081616	Poales	Bromeliaceae	Tillandsieae	Tillandsia	Tillandsia arequitae
328	NC_081615	Poales	Bromeliaceae	Tillandsieae	Tillandsia	Tillandsia andrieuxii
329	NC_081614	Poales	Bromeliaceae	Tillandsieae	Tillandsia	Tillandsia alvareziae
330	NC_081613	Poales	Bromeliaceae	Tillandsieae	Tillandsia	Tillandsia alfredo-lauii
331	NC_081612	Poales	Bromeliaceae	Tillandsieae	Tillandsia	Tillandsia albida
332	NC_081611	Poales	Bromeliaceae	Tillandsieae	Tillandsia	Tillandsia albertiana
333	NC_081610	Poales	Bromeliaceae	Tillandsieae	Tillandsia	Tillandsia aeranthos
419	NC_065189	Poales	Bromeliaceae	Tillandsieae	Tillandsia	Tillandsia sphaerocephala
420	NC_065180	Poales	Bromeliaceae	Tillandsieae	Tillandsia	Tillandsia edithae
421	NC_065174	Poales	Bromeliaceae	Tillandsieae	Tillandsia	Tillandsia brachycaulos
422	NC_065172	Poales	Bromeliaceae	Tillandsieae	Tillandsia	Tillandsia australis
435	NC_065184	Poales	Bromeliaceae	Tillandsieae	Tillandsia	Tillandsia imperialis
436	NC_065182	Poales	Bromeliaceae	Tillandsieae	Tillandsia	Tillandsia gymnobotrya
437	NC_065177	Poales	Bromeliaceae	Tillandsieae	Tillandsia	Tillandsia deppeana
438	NC_065171	Poales	Bromeliaceae	Tillandsieae	Tillandsia	Tillandsia achyrostachys
450	NC_065188	Poales	Bromeliaceae	Tillandsieae	Tillandsia	Tillandsia schiedeana
451	NC_065187	Poales	Bromeliaceae	Tillandsieae	Tillandsia	Tillandsia punctulata
464	NC_065185	Poales	Bromeliaceae	Tillandsieae	Tillandsia	Tillandsia ixioides
465	NC_065179	Poales	Bromeliaceae	Tillandsieae	Tillandsia	Tillandsia duratii
466	NC_065178	Poales	Bromeliaceae	Tillandsieae	Tillandsia	Tillandsia disticha
467	NC_065175	Poales	Bromeliaceae	Tillandsieae	Tillandsia	Tillandsia cacticola
468	NC_065173	Poales	Bromeliaceae	Tillandsieae	Tillandsia	Tillandsia bermejoensis
482	NC_065191	Poales	Bromeliaceae	Tillandsieae	Tillandsia	Tillandsia utriculata
483	NC_065190	Poales	Bromeliaceae	Tillandsieae	Tillandsia	Tillandsia usneoides
484	NC_065186	Poales	Bromeliaceae	Tillandsieae	Tillandsia	Tillandsia malzinei
485	NC_065181	Poales	Bromeliaceae	Tillandsieae	Tillandsia	Tillandsia espinosae
486	NC_065176	Poales	Bromeliaceae	Tillandsieae	Tillandsia	Tillandsia cereicola
489	NC_064985	Poales	Bromeliaceae	Tillandsieae	Tillandsia	Tillandsia cyanea
1289	MW442083	Poales	Bromeliaceae	Tillandsieae	Tillandsia	Tillandsia purpurea
389	OQ935633	Poales	Bromeliaceae	Tillandsia	Tillandsia elongata	Tillandsia elongata var. subimbricata
388	OQ935639	Poales	Bromeliaceae	Tillandsia	Tillandsia flexuosa	Tillandsia flexuosa var. vivipara
387	OQ935696	Poales	Bromeliaceae	Tillandsia	Tillandsia utriculata	Tillandsia utriculata subsp. pringlei
160	OQ308827	Poales	Bromeliaceae	Lindmania	unclassified Lindmania	Lindmania sp. AMF-2023a
597	NC_061349	Poales	Bromeliaceae	Neoregelia	unclassified Neoregelia	Neoregelia sp. WH1915
616	NC_061316	Poales	Bromeliaceae	Vriesea	unclassified Vriesea	Vriesea hybrid cultivar
201	NC_081742	Poales	Bromeliaceae	Tillandsieae	Viridantha	Viridantha tortilis
239	NC_081704	Poales	Bromeliaceae	Tillandsieae	Viridantha	Viridantha plumosa
409	NC_065183	Poales	Bromeliaceae	Tillandsieae	Viridantha	Viridantha ignesiae
190	NC_081753	Poales	Bromeliaceae	Vrieseinae	Vriesea	Vriesea vagans
191	NC_081752	Poales	Bromeliaceae	Vrieseinae	Vriesea	Vriesea friburgensis
418	NC_065193	Poales	Bromeliaceae	Vrieseinae	Vriesea	Vriesea sucrei
449	NC_065192	Poales	Bromeliaceae	Vrieseinae	Vriesea	Vriesea saundersii
189	NC_081754	Poales	Bromeliaceae	Tillandsieae	Wallisia	Wallisia lindeniana
463	NC_065194	Poales	Bromeliaceae	Tillandsieae	Wallisia	Wallisia cyanea
185	NC_081905	Poales	Bromeliaceae	Cipuropsidinae	Werauhia	Werauhia werckleana
186	NC_081904	Poales	Bromeliaceae	Cipuropsidinae	Werauhia	Werauhia gladioliflora
408	NC_065195	Poales	Bromeliaceae	Cipuropsidinae	Werauhia	Werauhia vanhyningii
417	NC_065196	Poales	Bromeliaceae	Cipuropsidinae	Zizkaea	Zizkaea tuerckheimii
715	NC_058998	Poales	Cyperaceae	Fuireneae	Bolboschoenus	Bolboschoenus planiculmis
150	OR668912	Poales	Cyperaceae	Cyperus subgen. Cyperus	C4 Cyperus incertae sedis	Cyperus microiria
151	OR639842	Poales	Cyperaceae	Cyperus subgen. Cyperus	C4 Cyperus incertae sedis	Cyperus amuricus
345	MZ895086	Poales	Cyperaceae	Cyperus subgen. Cyperus	C4 Cyperus incertae sedis	Cyperus esculentus
518	NC_072297	Poales	Cyperaceae	Cyperus subgen. Cyperus	C4 Cyperus incertae sedis	Cyperus papyrus
629	NC_061303	Poales	Cyperaceae	Cyperus subgen. Cyperus	C4 Cyperus incertae sedis	Cyperus glomeratus
630	NC_061302	Poales	Cyperaceae	Cyperus subgen. Cyperus	C4 Cyperus incertae sedis	Cyperus difformis
747	NC_054301	Poales	Cyperaceae	Cyperus subgen. Cyperus	C4 Cyperus incertae sedis	Cyperus iria
748	NC_054300	Poales	Cyperaceae	Cyperus subgen. Cyperus	C4 Cyperus incertae sedis	Cyperus exaltatus
810	NC_050170	Poales	Cyperaceae	Cyperus subgen. Cyperus	C4 Cyperus incertae sedis	Cyperus rotundus
344	NC_081502	Poales	Cyperaceae	Carex	Carex subgen. Carex	Carex giraldiana
520	NC_072263	Poales	Cyperaceae	Carex	Carex subgen. Carex	Carex breviculmis
665	NC_060382	Poales	Cyperaceae	Carex	Carex subgen. Carex	Carex agglomerata
2	NC_088442	Poales	Cyperaceae	Carex	Carex subgen. Euthyceras	Carex tibetikobresia
434	NC_066809	Poales	Cyperaceae	Carex	Carex subgen. Euthyceras	Carex littledalei
474	NC_063519	Poales	Cyperaceae	Carex	Carex subgen. Euthyceras	Carex myosuroides
634	NC_061255	Poales	Cyperaceae	Carex	Carex subgen. Euthyceras	Carex sargentiana
635	NC_061254	Poales	Cyperaceae	Carex	Carex subgen. Euthyceras	Carex microglochin
636	NC_061253	Poales	Cyperaceae	Carex	Carex subgen. Euthyceras	Carex kokanica
637	NC_061252	Poales	Cyperaceae	Carex	Carex subgen. Euthyceras	Carex capillifolia
638	NC_061251	Poales	Cyperaceae	Carex	Carex subgen. Euthyceras	Carex alatauensis
1256	ON920465	Poales	Cyperaceae	Carex	Carex subgen. Siderosticta	Carex siderosticta
530	NC_068625	Poales	Cyperaceae	Carex	Carex subgen. Vignea	Carex lithophila
632	NC_061300	Poales	Cyperaceae	Carex	Carex subgen. Vignea	Carex gibba
648	NC_060846	Poales	Cyperaceae	Carex	Carex subgen. Vignea	Carex laevissima
1029	NC_036037	Poales	Cyperaceae	Carex	Carex subgen. Vignea	Carex neurocarpa
16	NC_087701	Poales	Cyperaceae	Cyperus	Cyperus incertae sedis	Cyperus stolonifer
175	OR387483	Poales	Cyperaceae	Cyperus	Cyperus incertae sedis	Cyperus malaccensis
611	NC_061335	Poales	Cyperaceae	Cyperus	Cyperus incertae sedis	Cyperus simaoensis
612	NC_061334	Poales	Cyperaceae	Cyperus	Cyperus incertae sedis	Cyperus michelianus
124	OR438648	Poales	Cyperaceae	Cyperus incertae sedis	Cyperus malaccensis	Cyperus malaccensis subsp. monophyllus
814	NC_047448	Poales	Cyperaceae	Eleocharideae	Eleocharis	Eleocharis cellulosa
815	NC_047447	Poales	Cyperaceae	Eleocharideae	Eleocharis	Eleocharis dulcis
627	NC_061305	Poales	Cyperaceae	Schoeneae	Gahnia	Gahnia tristis
1030	NC_036036	Poales	Cyperaceae	Hypolytreae	Hypolytrum	Hypolytrum nemorum
746	NC_056187	Poales	Cyperaceae	Cypereae	Isolepis	Isolepis setacea
169	OR726385	Poales	Cyperaceae	Cyperus subgen. Cyperus	Kyllinga clade	Cyperus brevifolius
763	NC_051510	Poales	Cyperaceae	Cyperus subgen. Cyperus	Kyllinga clade	Cyperus aromaticus
620	NC_061312	Poales	Cyperaceae	Cyperus subgen. Cyperus	Pycreus clade	Cyperus flavidus
1	NC_088443	Poales	Cyperaceae	Fuireneae	Schoenoplectus	Schoenoplectus tabernaemontani
618	NC_061314	Poales	Cyperaceae	Scleria subgen. Scleria	Scleria sect. Foveolidia	Scleria parvula
614	NC_061332	Poales	Cyperaceae	Carex	unclassified Carex	Carex sp. SCSB-B-000526
610	NC_061336	Poales	Cyperaceae	Cyperus	unclassified Cyperus	Cyperus sp. YangQE3368
403	NC_066100	Poales	Eriocaulaceae	Eriocaulaceae	Eriocaulon	Eriocaulon oryzetorum
404	NC_066097	Poales	Eriocaulaceae	Eriocaulaceae	Eriocaulon	Eriocaulon miquelianum
405	NC_066095	Poales	Eriocaulaceae	Eriocaulaceae	Eriocaulon	Eriocaulon faberi
407	NC_066092	Poales	Eriocaulaceae	Eriocaulaceae	Eriocaulon	Eriocaulon fistulosum
412	NC_066099	Poales	Eriocaulaceae	Eriocaulaceae	Eriocaulon	Eriocaulon nantoense
413	NC_066098	Poales	Eriocaulaceae	Eriocaulaceae	Eriocaulon	Eriocaulon tonkinense
414	NC_066096	Poales	Eriocaulaceae	Eriocaulaceae	Eriocaulon	Eriocaulon nepalense
415	NC_066093	Poales	Eriocaulaceae	Eriocaulaceae	Eriocaulon	Eriocaulon truncatum
604	NC_061342	Poales	Eriocaulaceae	Eriocaulaceae	Eriocaulon	Eriocaulon schochianum
605	NC_061341	Poales	Eriocaulaceae	Eriocaulaceae	Eriocaulon	Eriocaulon henryanum
606	NC_061340	Poales	Eriocaulaceae	Eriocaulaceae	Eriocaulon	Eriocaulon brownianum
607	NC_061339	Poales	Eriocaulaceae	Eriocaulaceae	Eriocaulon	Eriocaulon australe
608	NC_061338	Poales	Eriocaulaceae	Eriocaulaceae	Eriocaulon	Eriocaulon alpestre
628	NC_061304	Poales	Eriocaulaceae	Eriocaulaceae	Eriocaulon	Eriocaulon cinereum
833	NC_044895	Poales	Eriocaulaceae	Eriocaulaceae	Eriocaulon	Eriocaulon decemflorum
912	NC_042211	Poales	Eriocaulaceae	Eriocaulaceae	Eriocaulon	Eriocaulon buergerianum
596	NC_061350	Poales	Eriocaulaceae	Eriocaulaceae	Paepalanthus	Paepalanthus alpinus
402	NC_066101	Poales	Eriocaulaceae	Eriocaulon	unclassified Eriocaulon	Eriocaulon sp. LE23
406	NC_066094	Poales	Eriocaulaceae	Eriocaulon	unclassified Eriocaulon	Eriocaulon sp. LE02
732	NC_058648	Poales	Flagellariaceae	Flagellariaceae	Flagellaria	Flagellaria indica
1117	NC_031427	Poales	Joinvilleaceae	Joinvilleaceae	Joinvillea	Joinvillea ascendens
600	NC_061346	Poales	Joinvilleaceae	Joinvillea	unclassified Joinvillea	Joinvillea sp. Yi14364
498	NC_059754	Poales	Juncaceae	Juncaceae	Juncus	Juncus effusus
525	NC_071364	Poales	Juncaceae	Juncaceae	Juncus	Juncus validus
526	NC_071363	Poales	Juncaceae	Juncaceae	Juncus	Juncus roemerianus
599	NC_061347	Poales	Juncaceae	Juncaceae	Juncus	Juncus grisebachii
621	NC_061311	Poales	Juncaceae	Juncaceae	Juncus	Juncus tenuis
622	NC_061310	Poales	Juncaceae	Juncaceae	Juncus	Juncus himalensis
623	NC_061309	Poales	Juncaceae	Juncaceae	Juncus	Juncus gracilicaulis
624	NC_061308	Poales	Juncaceae	Juncaceae	Juncus	Juncus compressus
625	NC_061307	Poales	Juncaceae	Juncaceae	Juncus	Juncus bufonius
626	NC_061306	Poales	Juncaceae	Juncaceae	Juncus	Juncus alatus
719	NC_058870	Poales	Poaceae	Stipeae	Achnatherum	Achnatherum pekinense
1338	MW423581	Poales	Poaceae	Stipeae	Achnatherum	Achnatherum inebrians
1232	NC_015820	Poales	Poaceae	Arundinariinae	Acidosasa	Acidosasa purpurea
559	NC_068107	Poales	Poaceae	Dactylocteniinae	Acrachne	Acrachne racemosa
823	NC_046697	Poales	Poaceae	Triticinae	Aegilops	Aegilops comosa
824	NC_046696	Poales	Poaceae	Triticinae	Aegilops	Aegilops umbellulata
1188	NC_024832	Poales	Poaceae	Triticinae	Aegilops	Aegilops kotschyi
1189	NC_024815	Poales	Poaceae	Triticinae	Aegilops	Aegilops searsii
1190	NC_024816	Poales	Poaceae	Triticinae	Aegilops	Aegilops sharonensis
1192	NC_024831	Poales	Poaceae	Triticinae	Aegilops	Aegilops bicornis
1193	NC_024830	Poales	Poaceae	Triticinae	Aegilops	Aegilops longissima
1218	NC_023096	Poales	Poaceae	Triticinae	Aegilops	Aegilops cylindrica
1219	NC_023097	Poales	Poaceae	Triticinae	Aegilops	Aegilops geniculata
1221	NC_022135	Poales	Poaceae	Triticinae	Aegilops	Aegilops speltoides
1222	NC_022133	Poales	Poaceae	Triticinae	Aegilops	Aegilops tauschii
156	OR936055	Poales	Poaceae	Aegilops speltoides	Aegilops speltoides subsp. speltoides	Aegilops speltoides var. aucheri
1537	KJ614406	Poales	Poaceae	Aegilops speltoides	Aegilops speltoides subsp. speltoides	Aegilops speltoides var. speltoides
1538	KJ614405	Poales	Poaceae	Aegilops speltoides	Aegilops speltoides subsp. speltoides	Aegilops speltoides var. ligustica
130	ON357749	Poales	Poaceae	Aeluropodinae	Aeluropus	Aeluropus littoralis
664	NC_060389	Poales	Poaceae	Aeluropodinae	Aeluropus	Aeluropus sinensis
892	NC_042858	Poales	Poaceae	Aeluropodinae	Aeluropus	Aeluropus lagopoides
693	NC_059820	Poales	Poaceae	Andropogoneae incertae sedis	Agenium	Agenium villosum
694	NC_059819	Poales	Poaceae	Andropogoneae incertae sedis	Agenium	Agenium leptocladum
1319	MN703672	Poales	Poaceae	Hordeinae	Agropyron	Agropyron cristatum
1408	MW309818	Poales	Poaceae	Hordeinae	Agropyron	Agropyron desertorum
1510	MH285848	Poales	Poaceae	Hordeinae	Agropyron	Agropyron mongolicum
400	OQ695464	Poales	Poaceae	Agrostidinae	Agrostis	Agrostis stolonifera
966	NC_037162	Poales	Poaceae	Agrostidinae	Agrostis	Agrostis gigantea
1336	MW143240	Poales	Poaceae	Agrostidinae	Agrostis	Agrostis capillaris
1046	NC_035519	Poales	Poaceae	Panicoideae incertae sedis	Alloeochaete	Alloeochaete uluguruensis
1047	NC_035518	Poales	Poaceae	Panicoideae incertae sedis	Alloeochaete	Alloeochaete oreogena
1048	NC_035517	Poales	Poaceae	Panicoideae incertae sedis	Alloeochaete	Alloeochaete namuliensis
1113	NC_032078	Poales	Poaceae	Boivinellinae	Alloteropsis	Alloteropsis paniculata
1173	NC_027952	Poales	Poaceae	Boivinellinae	Alloteropsis	Alloteropsis cimicina
1174	NC_027951	Poales	Poaceae	Boivinellinae	Alloteropsis	Alloteropsis angusta
1175	NC_027824	Poales	Poaceae	Boivinellinae	Alloteropsis	Alloteropsis semialata
477	NC_067048	Poales	Poaceae	Alopecurinae	Alopecurus	Alopecurus pratensis
816	NC_047229	Poales	Poaceae	Alopecurinae	Alopecurus	Alopecurus japonicus
817	NC_047228	Poales	Poaceae	Alopecurinae	Alopecurus	Alopecurus aequalis
965	NC_037163	Poales	Poaceae	Alopecurinae	Alopecurus	Alopecurus arundinaceus
410	NC_063907	Poales	Poaceae	Arundinariinae	Ampelocalamus	Ampelocalamus sinovietnamensis
668	NC_059867	Poales	Poaceae	Arundinariinae	Ampelocalamus	Ampelocalamus scandens
872	NC_043932	Poales	Poaceae	Arundinariinae	Ampelocalamus	Ampelocalamus melicoideus
873	NC_043931	Poales	Poaceae	Arundinariinae	Ampelocalamus	Ampelocalamus saxatilis
1120	NC_030767	Poales	Poaceae	Arundinariinae	Ampelocalamus	Ampelocalamus naibunensis
1281	MK393374	Poales	Poaceae	Arundinariinae	Ampelocalamus	Ampelocalamus mianningensis
1282	MK393373	Poales	Poaceae	Arundinariinae	Ampelocalamus	Ampelocalamus yongshanensis
1283	MK393370	Poales	Poaceae	Arundinariinae	Ampelocalamus	Ampelocalamus patellaris
1284	MK393369	Poales	Poaceae	Arundinariinae	Ampelocalamus	Ampelocalamus microphyllus
1285	MK393367	Poales	Poaceae	Arundinariinae	Ampelocalamus	Ampelocalamus luodianensis
1286	MK393366	Poales	Poaceae	Arundinariinae	Ampelocalamus	Ampelocalamus hirsutissimus
1287	MK393365	Poales	Poaceae	Arundinariinae	Ampelocalamus	Ampelocalamus breviligulatus
1452	MH988715	Poales	Poaceae	Arundinariinae	Ampelocalamus	Ampelocalamus calcareus
1454	MH410123	Poales	Poaceae	Arundinariinae	Ampelocalamus	Ampelocalamus actinotrichus
1127	NC_030619	Poales	Poaceae	Boivinellinae	Amphicarpum	Amphicarpum muhlenbergianum
1045	NC_035521	Poales	Poaceae	Arundineae	Amphipogon	Amphipogon turbinatus
1054	NC_035520	Poales	Poaceae	Arundineae	Amphipogon	Amphipogon caricinus
62	NC_087655	Poales	Poaceae	Andropogoninae	Anadelphia	Anadelphia scyphofera
55	NC_087662	Poales	Poaceae	Andropogoninae	Anatherum	Anatherum pringlei
103	NC_086843	Poales	Poaceae	Andropogoninae	Anatherum	Anatherum trichozygum
104	NC_086842	Poales	Poaceae	Andropogoninae	Anatherum	Anatherum virginicum
106	NC_086840	Poales	Poaceae	Andropogoninae	Anatherum	Anatherum ibityense
107	NC_086839	Poales	Poaceae	Andropogoninae	Anatherum	Anatherum glomeratum
108	NC_086838	Poales	Poaceae	Andropogoninae	Anatherum	Anatherum brachystachyum
109	NC_086837	Poales	Poaceae	Andropogoninae	Anatherum	Anatherum capillipes
110	NC_086836	Poales	Poaceae	Andropogoninae	Anatherum	Anatherum arenarium
111	NC_086835	Poales	Poaceae	Andropogoninae	Anatherum	Anatherum africanum
112	NC_086834	Poales	Poaceae	Andropogoninae	Anatherum	Anatherum bicorne
1352	MT610095	Poales	Poaceae	Andropogoninae	Anatherum	Anatherum eucomum
1464	MH181232	Poales	Poaceae	Andropogoninae	Anatherum	Anatherum liebmannii
1465	MH181230	Poales	Poaceae	Andropogoninae	Anatherum	Anatherum urbanianum
1470	MH181221	Poales	Poaceae	Andropogoninae	Anatherum	Anatherum floridanum
1471	MH181218	Poales	Poaceae	Andropogoninae	Anatherum	Anatherum aequatoriensis
1473	MH181216	Poales	Poaceae	Andropogoninae	Anatherum	Anatherum mohrii
1475	MH181213	Poales	Poaceae	Andropogoninae	Anatherum	Anatherum selloanum
1479	MH181204	Poales	Poaceae	Andropogoninae	Anatherum	Anatherum ligulatum
1488	MH181185	Poales	Poaceae	Andropogoninae	Anatherum	Anatherum glaucescens
1495	MH181171	Poales	Poaceae	Andropogoninae	Anatherum	Anatherum gyrans
1497	MH181163	Poales	Poaceae	Andropogoninae	Anatherum	Anatherum insolitum
1490	MH181180	Poales	Poaceae	Anatherum	Anatherum eucomum	Anatherum eucomum subsp. huillense
51	NC_087666	Poales	Poaceae	Andropogoninae	Andropogon	Andropogon textilis
53	NC_087664	Poales	Poaceae	Andropogoninae	Andropogon	Andropogon pteropholis
54	NC_087663	Poales	Poaceae	Andropogoninae	Andropogon	Andropogon pseudapricus
56	NC_087661	Poales	Poaceae	Andropogoninae	Andropogon	Andropogon macrophyllus
57	NC_087660	Poales	Poaceae	Andropogoninae	Andropogon	Andropogon lima
58	NC_087659	Poales	Poaceae	Andropogoninae	Andropogon	Andropogon leprodes
59	NC_087658	Poales	Poaceae	Andropogoninae	Andropogon	Andropogon kelleri
60	NC_087657	Poales	Poaceae	Andropogoninae	Andropogon	Andropogon itremoensis
61	NC_087656	Poales	Poaceae	Andropogoninae	Andropogon	Andropogon festuciformis
63	NC_087654	Poales	Poaceae	Andropogoninae	Andropogon	Andropogon chevalieri
64	NC_087653	Poales	Poaceae	Andropogoninae	Andropogon	Andropogon amethystinus
65	NC_087652	Poales	Poaceae	Andropogoninae	Andropogon	Andropogon angustatus
66	NC_087651	Poales	Poaceae	Andropogoninae	Andropogon	Andropogon andringitrensis
105	NC_086841	Poales	Poaceae	Andropogoninae	Andropogon	Andropogon tenuiberbis
939	NC_040129	Poales	Poaceae	Andropogoninae	Andropogon	Andropogon ascinodis
940	NC_040128	Poales	Poaceae	Andropogoninae	Andropogon	Andropogon greenwayi
941	NC_040127	Poales	Poaceae	Andropogoninae	Andropogon	Andropogon gayanus
943	NC_040111	Poales	Poaceae	Andropogoninae	Andropogon	Andropogon gerardi
1062	NC_035041	Poales	Poaceae	Andropogoninae	Andropogon	Andropogon distachyos
1065	NC_035038	Poales	Poaceae	Andropogoninae	Andropogon	Andropogon burmanicus
1082	NC_035012	Poales	Poaceae	Andropogoninae	Andropogon	Andropogon chinensis
1088	NC_035030	Poales	Poaceae	Andropogoninae	Andropogon	Andropogon abyssinicus
1344	MT942631	Poales	Poaceae	Andropogoninae	Andropogon	Andropogon hallii
1460	MH660710	Poales	Poaceae	Andropogoninae	Andropogon	Andropogon ivorensis
1461	MH181237	Poales	Poaceae	Andropogoninae	Andropogon	Andropogon mannii
1462	MH181236	Poales	Poaceae	Andropogoninae	Andropogon	Andropogon brazzae
1467	MH181225	Poales	Poaceae	Andropogoninae	Andropogon	Andropogon schirensis
1468	MH181224	Poales	Poaceae	Andropogoninae	Andropogon	Andropogon canaliculatus
1469	MH181223	Poales	Poaceae	Andropogoninae	Andropogon	Andropogon virgatus
1474	MH181215	Poales	Poaceae	Andropogoninae	Andropogon	Andropogon munroi
1477	MH181206	Poales	Poaceae	Andropogoninae	Andropogon	Andropogon laxatus
1482	MH181198	Poales	Poaceae	Andropogoninae	Andropogon	Andropogon chrysostachyus
1483	MH181197	Poales	Poaceae	Andropogoninae	Andropogon	Andropogon gracilis
1484	MH181194	Poales	Poaceae	Andropogoninae	Andropogon	Andropogon crossotos
1487	MH181186	Poales	Poaceae	Andropogoninae	Andropogon	Andropogon heterantherus
1492	MH181175	Poales	Poaceae	Andropogoninae	Andropogon	Andropogon pusillus
1493	MH181173	Poales	Poaceae	Andropogoninae	Andropogon	Andropogon appendiculatus
1494	MH181172	Poales	Poaceae	Andropogoninae	Andropogon	Andropogon ingratus
89	OQ518181	Poales	Poaceae	Andropogon	Andropogon gayanus	Andropogon gayanus var. bisquamulatus
90	OQ518180	Poales	Poaceae	Andropogon	Andropogon gayanus	Andropogon gayanus var. polycladus
1370	MT610072	Poales	Poaceae	Ischaeminae	Andropterum	Andropterum stolzii
1233	NC_014062	Poales	Poaceae	Anomochloeae	Anomochloa	Anomochloa marantoidea
1313	MK775260	Poales	Poaceae	Hordeinae	Anthosachne	Anthosachne rectiseta
1382	MT610058	Poales	Poaceae	Apludinae	Apluda	Apluda mutica
651	NC_060728	Poales	Poaceae	Aristideae	Aristida	Aristida adscensionis
818	NC_046732	Poales	Poaceae	Aristideae	Aristida	Aristida diffusa
819	NC_046731	Poales	Poaceae	Aristideae	Aristida	Aristida congesta
820	NC_046730	Poales	Poaceae	Aristideae	Aristida	Aristida stipitata
821	NC_046729	Poales	Poaceae	Aristideae	Aristida	Aristida behriana
829	NC_046413	Poales	Poaceae	Aristideae	Aristida	Aristida glaziovii
897	NC_042836	Poales	Poaceae	Aristideae	Aristida	Aristida pruinosa
964	NC_037164	Poales	Poaceae	Aristideae	Aristida	Aristida ternipes
1010	NC_036130	Poales	Poaceae	Aristideae	Aristida	Aristida rufescens
1080	NC_035017	Poales	Poaceae	Arthraxoninae	Arthraxon	Arthraxon lanceolatus
1085	NC_035050	Poales	Poaceae	Arthraxoninae	Arthraxon	Arthraxon microphyllus
1086	NC_035048	Poales	Poaceae	Arthraxoninae	Arthraxon	Arthraxon hispidus
1133	NC_030613	Poales	Poaceae	Arthraxoninae	Arthraxon	Arthraxon prionodes
835	NC_044488	Poales	Poaceae	Arundinariinae	Arundinaria	Arundinaria humbertii
1207	NC_024712	Poales	Poaceae	Arundinariinae	Arundinaria	Arundinaria fargesii
1213	NC_023935	Poales	Poaceae	Arundinariinae	Arundinaria	Arundinaria tecta
1214	NC_023934	Poales	Poaceae	Arundinariinae	Arundinaria	Arundinaria appalachiana
1226	NC_020341	Poales	Poaceae	Arundinariinae	Arundinaria	Arundinaria gigantea
1126	NC_030620	Poales	Poaceae	Arundinelleae	Arundinella	Arundinella deppeana
1392	MT610047	Poales	Poaceae	Arundinelleae	Arundinella	Arundinella nepalensis
1444	MK593544	Poales	Poaceae	Arundinelleae	Arundinella	Arundinella hookeri
1445	MK593543	Poales	Poaceae	Arundinelleae	Arundinella	Arundinella hirta
385	OQ993163	Poales	Poaceae	Arundineae	Arundo	Arundo donax
751	NC_054211	Poales	Poaceae	Arundineae	Arundo	Arundo formosana
1104	NC_034652	Poales	Poaceae	Arundineae	Arundo	Arundo plinii
894	NC_042839	Poales	Poaceae	Eleusininae	Astrebla	Astrebla lappacea
853	NC_043840	Poales	Poaceae	Hordeinae	Australopyrum	Australopyrum retrofractum
1410	MW309815	Poales	Poaceae	Hordeinae	Australopyrum	Australopyrum pectinatum
355	MK336398	Poales	Poaceae	Aveninae	Avena	Avena sativa
356	MK336396	Poales	Poaceae	Aveninae	Avena	Avena ventricosa
357	MK336394	Poales	Poaceae	Aveninae	Avena	Avena atlantica
358	MK336393	Poales	Poaceae	Aveninae	Avena	Avena brevis
359	MK336392	Poales	Poaceae	Aveninae	Avena	Avena hirtula
360	MK336390	Poales	Poaceae	Aveninae	Avena	Avena murphyi
361	MK336389	Poales	Poaceae	Aveninae	Avena	Avena nuda
362	MK336388	Poales	Poaceae	Aveninae	Avena	Avena wiestii
363	MK336397	Poales	Poaceae	Aveninae	Avena	Avena strigosa
364	MK336395	Poales	Poaceae	Aveninae	Avena	Avena eriantha
838	NC_044175	Poales	Poaceae	Aveninae	Avena	Avena occidentalis
839	NC_044173	Poales	Poaceae	Aveninae	Avena	Avena barbata
840	NC_044170	Poales	Poaceae	Aveninae	Avena	Avena fatua
841	NC_044169	Poales	Poaceae	Aveninae	Avena	Avena longiglumis
842	NC_044168	Poales	Poaceae	Aveninae	Avena	Avena vaviloviana
843	NC_044167	Poales	Poaceae	Aveninae	Avena	Avena clauda
844	NC_044166	Poales	Poaceae	Aveninae	Avena	Avena damascena
845	NC_044164	Poales	Poaceae	Aveninae	Avena	Avena hispanica
846	NC_044162	Poales	Poaceae	Aveninae	Avena	Avena maroccana
847	NC_044161	Poales	Poaceae	Aveninae	Avena	Avena canariensis
848	NC_044159	Poales	Poaceae	Aveninae	Avena	Avena agadiriana
849	NC_044158	Poales	Poaceae	Aveninae	Avena	Avena abyssinica
850	NC_044149	Poales	Poaceae	Aveninae	Avena	Avena lusitanica
851	NC_044148	Poales	Poaceae	Aveninae	Avena	Avena hybrida
1116	NC_031650	Poales	Poaceae	Aveninae	Avena	Avena sterilis
1335	MW784232	Poales	Poaceae	Aveninae	Avena	Avena chinensis
1459	MG674209	Poales	Poaceae	Aveninae	Avena	Avena insularis
827	NC_046490	Poales	Poaceae	Paspalinae	Axonopus	Axonopus compressus
1011	NC_036129	Poales	Poaceae	Paspalinae	Axonopus	Axonopus ramosus
1138	NC_030501	Poales	Poaceae	Paspalinae	Axonopus	Axonopus fissifolius
353	OR069396	Poales	Poaceae	Bambusinae	Bambusa	Bambusa ooh
490	NC_063134	Poales	Poaceae	Bambusinae	Bambusa	Bambusa stenostachya
523	NC_071780	Poales	Poaceae	Bambusinae	Bambusa	Bambusa textilis
524	NC_071779	Poales	Poaceae	Bambusinae	Bambusa	Bambusa tuldoides
529	NC_068816	Poales	Poaceae	Bambusinae	Bambusa	Bambusa grandis
562	NC_068060	Poales	Poaceae	Bambusinae	Bambusa	Bambusa x changningensis
567	NC_063148	Poales	Poaceae	Bambusinae	Bambusa	Bambusa utilis
569	NC_063133	Poales	Poaceae	Bambusinae	Bambusa	Bambusa dolichoclada
570	NC_063132	Poales	Poaceae	Bambusinae	Bambusa	Bambusa pachinensis
571	NC_063131	Poales	Poaceae	Bambusinae	Bambusa	Bambusa dolichomerithalla
572	NC_063090	Poales	Poaceae	Bambusinae	Bambusa	Bambusa variostriata
696	NC_059751	Poales	Poaceae	Bambusinae	Bambusa	Bambusa contracta
697	NC_059750	Poales	Poaceae	Bambusinae	Bambusa	Bambusa lapidea
737	NC_058217	Poales	Poaceae	Bambusinae	Bambusa	Bambusa stenoaurita
755	NC_053748	Poales	Poaceae	Bambusinae	Bambusa	Bambusa pervariabilis
764	NC_050781	Poales	Poaceae	Bambusinae	Bambusa	Bambusa sinospinosa
765	NC_050780	Poales	Poaceae	Bambusinae	Bambusa	Bambusa vulgaris
770	NC_050775	Poales	Poaceae	Bambusinae	Bambusa	Bambusa rutila
771	NC_050774	Poales	Poaceae	Bambusinae	Bambusa	Bambusa flexuosa
772	NC_050773	Poales	Poaceae	Bambusinae	Bambusa	Bambusa basihirsuta
773	NC_050772	Poales	Poaceae	Bambusinae	Bambusa	Bambusa bicicatricata
774	NC_050771	Poales	Poaceae	Bambusinae	Bambusa	Bambusa odashimae
775	NC_050770	Poales	Poaceae	Bambusinae	Bambusa	Bambusa cornigera
776	NC_050768	Poales	Poaceae	Bambusinae	Bambusa	Bambusa oliveriana
790	NC_050754	Poales	Poaceae	Bambusinae	Bambusa	Bambusa boniopsis
793	NC_050751	Poales	Poaceae	Bambusinae	Bambusa	Bambusa teres
808	NC_050300	Poales	Poaceae	Bambusinae	Bambusa	Bambusa rigida
909	NC_042671	Poales	Poaceae	Bambusinae	Bambusa	Bambusa ventricosa
1209	NC_024668	Poales	Poaceae	Bambusinae	Bambusa	Bambusa multiplex
1230	NC_015830	Poales	Poaceae	Bambusinae	Bambusa	Bambusa emeiensis
1237	NC_012927	Poales	Poaceae	Bambusinae	Bambusa	Bambusa oldhamii
1341	MW557324	Poales	Poaceae	Bambusinae	Bambusa	Bambusa albolineata
1398	MW463057	Poales	Poaceae	Bambusinae	Bambusa	Bambusa intermedia
1333	MW770448	Poales	Poaceae	Bambusa	Bambusa beecheyana	Bambusa beecheyana var. pubescens
1272	OM001093	Poales	Poaceae	Bambusa	Bambusa pachinensis	Bambusa pachinensis var. hirsutissima
1258	OM687229	Poales	Poaceae	Bambusa	Bambusa tuldoides	Bambusa tuldoides f. swolleninternode
1407	MT653696	Poales	Poaceae	Beckmanniinae	Beckmannia	Beckmannia syzigachne
145	NC_085343	Poales	Poaceae	Bambusinae	Bonia	Bonia levigata
788	NC_050756	Poales	Poaceae	Bambusinae	Bonia	Bonia saxatilis
937	NC_040131	Poales	Poaceae	Anthistiriinae	Bothriochloa	Bothriochloa decipiens
1125	NC_030621	Poales	Poaceae	Anthistiriinae	Bothriochloa	Bothriochloa alta
1390	MT610049	Poales	Poaceae	Anthistiriinae	Bothriochloa	Bothriochloa bladhii
1396	MW699899	Poales	Poaceae	Anthistiriinae	Bothriochloa	Bothriochloa ischaemum
558	NC_068108	Poales	Poaceae	Boutelouinae	Bouteloua	Bouteloua dactyloides
1107	NC_033879	Poales	Poaceae	Melinidinae	Brachiaria	Brachiaria fragrans
733	NC_058601	Poales	Poaceae	Brachypodieae	Brachypodium	Brachypodium sylvaticum
974	NC_036837	Poales	Poaceae	Brachypodieae	Brachypodium	Brachypodium stacei
975	NC_036836	Poales	Poaceae	Brachypodieae	Brachypodium	Brachypodium hybridum
1238	NC_011032	Poales	Poaceae	Brachypodieae	Brachypodium	Brachypodium distachyon
460	NC_067043	Poales	Poaceae	Brizinae	Briza	Briza media
176	NC_082233	Poales	Poaceae	Bromeae	Bromus	Bromus diandrus
478	NC_067047	Poales	Poaceae	Bromeae	Bromus	Bromus inermis
750	NC_054212	Poales	Poaceae	Bromeae	Bromus	Bromus catharticus
1409	MW309816	Poales	Poaceae	Bromeae	Bromus	Bromus biebersteinii
479	NC_067046	Poales	Poaceae	Agrostidinae	Calamagrostis	Calamagrostis epigeios
411	NC_063547	Poales	Poaceae	Hordeinae	Campeiostachys	Campeiostachys purpuraristata
416	NC_066044	Poales	Poaceae	Hordeinae	Campeiostachys	Campeiostachys calcicola
718	NC_058918	Poales	Poaceae	Hordeinae	Campeiostachys	Campeiostachys nutans
762	NC_051511	Poales	Poaceae	Hordeinae	Campeiostachys	Campeiostachys kamoji
811	NC_049159	Poales	Poaceae	Hordeinae	Campeiostachys	Campeiostachys dahurica
1294	MT644149	Poales	Poaceae	Campeiostachys	Campeiostachys dahurica	[Elymus] dahuricus var. violeus
1295	MT644148	Poales	Poaceae	Campeiostachys	Campeiostachys dahurica	Campeiostachys dahurica var. cylindrica
1296	MT644147	Poales	Poaceae	Campeiostachys	Campeiostachys dahurica	Campeiostachys dahurica var. excelsa
1314	MK775254	Poales	Poaceae	Campeiostachys	Campeiostachys dahurica	Campeiostachys dahurica var. tangutorum
1124	NC_030622	Poales	Poaceae	Anthistiriinae	Capillipedium	Capillipedium venustum
1361	MT610083	Poales	Poaceae	Anthistiriinae	Capillipedium	Capillipedium spicigerum
981	NC_036711	Poales	Poaceae	Parapholiinae	Catapodium	Catapodium rigidum
113	NC_086744	Poales	Poaceae	Cenchrinae	Cenchrus	Cenchrus purpurascens
114	NC_086743	Poales	Poaceae	Cenchrinae	Cenchrus	Cenchrus glaucus
115	NC_086742	Poales	Poaceae	Cenchrinae	Cenchrus	Cenchrus polystachios
116	NC_086741	Poales	Poaceae	Cenchrinae	Cenchrus	Cenchrus orientalis
117	NC_086740	Poales	Poaceae	Cenchrinae	Cenchrus	Cenchrus setaceus
118	NC_086739	Poales	Poaceae	Cenchrinae	Cenchrus	Cenchrus longisetus
120	NC_086737	Poales	Poaceae	Cenchrinae	Cenchrus	Cenchrus clandestinus
121	NC_086736	Poales	Poaceae	Cenchrinae	Cenchrus	Cenchrus massaicus
122	NC_086735	Poales	Poaceae	Cenchrinae	Cenchrus	Cenchrus longissimus
148	PP098462	Poales	Poaceae	Cenchrinae	Cenchrus	Cenchrus purpureus
149	PP098461	Poales	Poaceae	Cenchrinae	Cenchrus	Cenchrus americanus
470	NC_064146	Poales	Poaceae	Cenchrinae	Cenchrus	Cenchrus myosuroides
739	NC_057588	Poales	Poaceae	Cenchrinae	Cenchrus	Cenchrus centrasiaticus
740	NC_057571	Poales	Poaceae	Cenchrinae	Cenchrus	Cenchrus flaccidus
934	NC_041434	Poales	Poaceae	Cenchrinae	Cenchrus	Cenchrus ciliaris
1448	MN078361	Poales	Poaceae	Cenchrinae	Cenchrus	Cenchrus longispinus
1449	MN078360	Poales	Poaceae	Cenchrinae	Cenchrus	Cenchrus echinatus
980	NC_036712	Poales	Poaceae	Melinidinae	Chaetium	Chaetium bromoides
1443	MK593546	Poales	Poaceae	Panicoideae incertae sedis	Chandrasekharania	Chandrasekharania keralensis
1106	NC_033880	Poales	Poaceae	Boivinellinae	Chasechloa	Chasechloa madagascariensis
1119	NC_031299	Poales	Poaceae	Boivinellinae	Chasechloa	Chasechloa egregia
1053	NC_035522	Poales	Poaceae	Chasmanthieae	Chasmanthium	Chasmanthium laxum
1530	KU291494	Poales	Poaceae	Chasmanthium	Chasmanthium laxum	Chasmanthium laxum subsp. sessiliflorum
936	NC_041081	Poales	Poaceae	Zizaniinae	Chikusichloa	Chikusichloa mutica
1182	NC_027184	Poales	Poaceae	Zizaniinae	Chikusichloa	Chikusichloa aquatica
566	NC_067555	Poales	Poaceae	Arundinariinae	Chimonobambusa	Chimonobambusa sangzhiensis
577	NC_062708	Poales	Poaceae	Arundinariinae	Chimonobambusa	Chimonobambusa luzhiensis
666	NC_060376	Poales	Poaceae	Arundinariinae	Chimonobambusa	Chimonobambusa purpurea
745	NC_056904	Poales	Poaceae	Arundinariinae	Chimonobambusa	Chimonobambusa sichuanensis
754	NC_053872	Poales	Poaceae	Arundinariinae	Chimonobambusa	Chimonobambusa hejiangensis
1280	OK046142	Poales	Poaceae	Arundinariinae	Chimonobambusa	Chimonobambusa hirtinoda
1334	MW928533	Poales	Poaceae	Arundinariinae	Chimonobambusa	Chimonobambusa quadrangularis
1205	NC_024714	Poales	Poaceae	Arundinariinae	Chimonocalamus	Chimonocalamus longiusculus
1358	MT610087	Poales	Poaceae	Chionachninae	Chionachne	Chionachne koenigii
1114	NC_032034	Poales	Poaceae	Eleusininae	Chloris	Chloris virgata
1115	NC_032033	Poales	Poaceae	Eleusininae	Chloris	Chloris truncata
499	NC_035034	Poales	Poaceae	Chrysopogoninae	Chrysopogon	Chrysopogon zizanioides
828	NC_046489	Poales	Poaceae	Chrysopogoninae	Chrysopogon	Chrysopogon aciculatus
1058	NC_035047	Poales	Poaceae	Chrysopogoninae	Chrysopogon	Chrysopogon orientalis
1067	NC_035035	Poales	Poaceae	Chrysopogoninae	Chrysopogon	Chrysopogon gryllus
1160	NC_029884	Poales	Poaceae	Chrysopogoninae	Chrysopogon	Chrysopogon serrulatus
908	NC_042672	Poales	Poaceae	Chusqueinae	Chusquea	Chusquea culeou
655	NC_060398	Poales	Poaceae	Orininae	Cleistogenes	Cleistogenes squarrosa
656	NC_060397	Poales	Poaceae	Orininae	Cleistogenes	Cleistogenes songorica
657	NC_060396	Poales	Poaceae	Orininae	Cleistogenes	Cleistogenes polyphylla
658	NC_060395	Poales	Poaceae	Orininae	Cleistogenes	Cleistogenes hancei
659	NC_060394	Poales	Poaceae	Orininae	Cleistogenes	Cleistogenes hackelii
660	NC_060393	Poales	Poaceae	Orininae	Cleistogenes	Cleistogenes gracilis
661	NC_060392	Poales	Poaceae	Orininae	Cleistogenes	Cleistogenes festucacea
662	NC_060391	Poales	Poaceae	Orininae	Cleistogenes	Cleistogenes chinensis
663	NC_060390	Poales	Poaceae	Orininae	Cleistogenes	Cleistogenes caespitosa
1402	MW194083	Poales	Poaceae	Cleistogenes	Cleistogenes caespitosa	Cleistogenes caespitosa var. ramosa
1401	MW194088	Poales	Poaceae	Cleistogenes	Cleistogenes hackelii	Cleistogenes hackelii var. nakaii
1034	NC_035732	Poales	Poaceae	Isachneae	Coelachne	Coelachne africana
1235	NC_013273	Poales	Poaceae	Rottboelliinae	Coix	Coix lacryma-jobi
1347	MT942628	Poales	Poaceae	Rottboelliinae	Coix	Coix aquatica
1413	MT471102	Poales	Poaceae	Coix	Coix lacryma-jobi	Coix lacryma-jobi var. puellarum
1414	MT471101	Poales	Poaceae	Coix	Coix lacryma-jobi	Coix lacryma-jobi var. ma-yuen
1415	MT471095	Poales	Poaceae	Coix	Coix lacryma-jobi	Coix lacryma-jobi var. maxima
1416	MT471094	Poales	Poaceae	Coix	Coix lacryma-jobi	Coix lacryma-jobi var. stenocarpa
431	NC_062353	Poales	Poaceae	Coleanthinae	Coleanthus	Coleanthus subtilis
963	NC_037165	Poales	Poaceae	Hordeinae	Connorochloa	Connorochloa tenuis
1043	NC_035524	Poales	Poaceae	Crinipinae	Crinipes	Crinipes longifolius
1044	NC_035523	Poales	Poaceae	Crinipinae	Crinipes	Crinipes abyssinicus
1509	MH285849	Poales	Poaceae	Hordeinae	Crithopsis	Crithopsis delileana
3	NC_088436	Poales	Poaceae	Cteniinae	Ctenium	Ctenium longiglume
4	NC_088435	Poales	Poaceae	Cteniinae	Ctenium	Ctenium cirrhosum
5	NC_088434	Poales	Poaceae	Cteniinae	Ctenium	Ctenium chapadense
6	NC_088433	Poales	Poaceae	Cteniinae	Ctenium	Ctenium canescens
7	NC_088432	Poales	Poaceae	Cteniinae	Ctenium	Ctenium brevispicatum
12	OR161890	Poales	Poaceae	Cteniinae	Ctenium	Ctenium concinnum
13	OR148038	Poales	Poaceae	Cteniinae	Ctenium	Ctenium brachystachyum
134	NC_085717	Poales	Poaceae	Cteniinae	Ctenium	Ctenium aromaticum
135	NC_085715	Poales	Poaceae	Cteniinae	Ctenium	Ctenium polystachyum
136	NC_085714	Poales	Poaceae	Cteniinae	Ctenium	Ctenium plumosum
137	NC_085713	Poales	Poaceae	Cteniinae	Ctenium	Ctenium concissum
138	NC_085712	Poales	Poaceae	Cteniinae	Ctenium	Ctenium newtonii
352	NC_080535	Poales	Poaceae	Anthistiriinae	Cymbopogon	Cymbopogon winterianus
689	NC_059824	Poales	Poaceae	Anthistiriinae	Cymbopogon	Cymbopogon schoenanthus
690	NC_059823	Poales	Poaceae	Anthistiriinae	Cymbopogon	Cymbopogon pospischilii
691	NC_059822	Poales	Poaceae	Anthistiriinae	Cymbopogon	Cymbopogon obtectus
692	NC_059821	Poales	Poaceae	Anthistiriinae	Cymbopogon	Cymbopogon densiflorus
915	NC_042144	Poales	Poaceae	Anthistiriinae	Cymbopogon	Cymbopogon citratus
1063	NC_035040	Poales	Poaceae	Anthistiriinae	Cymbopogon	Cymbopogon flexuosus
1388	MT610051	Poales	Poaceae	Anthistiriinae	Cymbopogon	Cymbopogon martinii
556	NC_068110	Poales	Poaceae	Eleusininae	Cynodon	Cynodon radiatus
1093	NC_034680	Poales	Poaceae	Eleusininae	Cynodon	Cynodon dactylon
1447	MK175053	Poales	Poaceae	Eleusininae	Cynodon	Cynodon dactylon x Cynodon transvaalensis
979	NC_036713	Poales	Poaceae	Cynosurinae	Cynosurus	Cynosurus cristatus
1262	OM049559	Poales	Poaceae	Dactylidinae	Dactylis	Dactylis glomerata
895	NC_042838	Poales	Poaceae	Dactylocteniinae	Dactyloctenium	Dactyloctenium radulans
978	NC_036714	Poales	Poaceae	Dactylocteniinae	Dactyloctenium	Dactyloctenium aegyptium
1137	NC_030502	Poales	Poaceae	Tristachyideae	Danthoniopsis	Danthoniopsis dinteri
1442	MK593548	Poales	Poaceae	Tristachyideae	Danthoniopsis	Danthoniopsis stocksii
1508	MH285850	Poales	Poaceae	Triticinae	Dasypyrum	Dasypyrum villosum
154	MN933913	Poales	Poaceae	Bambusinae	Dendrocalamus	Dendrocalamus hamiltonii
349	NC_081047	Poales	Poaceae	Bambusinae	Dendrocalamus	Dendrocalamus liboensis
439	NC_063702	Poales	Poaceae	Bambusinae	Dendrocalamus	Dendrocalamus farinosus
769	NC_050776	Poales	Poaceae	Bambusinae	Dendrocalamus	Dendrocalamus strictus
778	NC_050766	Poales	Poaceae	Bambusinae	Dendrocalamus	Dendrocalamus membranaceus
780	NC_050764	Poales	Poaceae	Bambusinae	Dendrocalamus	Dendrocalamus fugongensis
781	NC_050763	Poales	Poaceae	Bambusinae	Dendrocalamus	Dendrocalamus brandisii
782	NC_050762	Poales	Poaceae	Bambusinae	Dendrocalamus	Dendrocalamus bambusoides
783	NC_050761	Poales	Poaceae	Bambusinae	Dendrocalamus	Dendrocalamus yunnanicus
784	NC_050760	Poales	Poaceae	Bambusinae	Dendrocalamus	Dendrocalamus sikkimensis
785	NC_050759	Poales	Poaceae	Bambusinae	Dendrocalamus	Dendrocalamus ovatus
786	NC_050758	Poales	Poaceae	Bambusinae	Dendrocalamus	Dendrocalamus pulverulentus
787	NC_050757	Poales	Poaceae	Bambusinae	Dendrocalamus	Dendrocalamus sapidus
789	NC_050755	Poales	Poaceae	Bambusinae	Dendrocalamus	Dendrocalamus minor
791	NC_050753	Poales	Poaceae	Bambusinae	Dendrocalamus	Dendrocalamus pachystachyus
792	NC_050752	Poales	Poaceae	Bambusinae	Dendrocalamus	Dendrocalamus giganteus
794	NC_050750	Poales	Poaceae	Bambusinae	Dendrocalamus	Dendrocalamus birmanicus
796	NC_050748	Poales	Poaceae	Bambusinae	Dendrocalamus	Dendrocalamus semiscandens
797	NC_050747	Poales	Poaceae	Bambusinae	Dendrocalamus	Dendrocalamus barbatus
830	NC_045941	Poales	Poaceae	Bambusinae	Dendrocalamus	Dendrocalamus sinicus
1236	NC_013088	Poales	Poaceae	Bambusinae	Dendrocalamus	Dendrocalamus latiflorus
1421	MK679778	Poales	Poaceae	Dendrocalamus	Dendrocalamus barbatus	Dendrocalamus barbatus var. internodiiradicatus
1420	MK679791	Poales	Poaceae	Dendrocalamus	Dendrocalamus minor	Dendrocalamus minor var. amoenus
350	NC_080989	Poales	Poaceae	Aristaveninae	Deschampsia	Deschampsia nubigena
1267	MZ568926	Poales	Poaceae	Aristaveninae	Deschampsia	Deschampsia cespitosa
430	NC_063471	Poales	Poaceae	Tripogoninae	Desmostachya	Desmostachya bipinnata
1052	NC_035525	Poales	Poaceae	Panicoideae incertae sedis	Dichaetaria	Dichaetaria wightii
807	NC_050403	Poales	Poaceae	Dichantheliinae	Dichanthelium	Dichanthelium ravenelii
1123	NC_030623	Poales	Poaceae	Dichantheliinae	Dichanthelium	Dichanthelium acuminatum
1422	MN983112	Poales	Poaceae	Dichantheliinae	Dichanthelium	Dichanthelium dichotomum
914	NC_042145	Poales	Poaceae	Anthistiriinae	Dichanthium	Dichanthium annulatum
1091	NC_035018	Poales	Poaceae	Anthistiriinae	Dichanthium	Dichanthium sericeum
1441	MK593549	Poales	Poaceae	Anthistiriinae	Dichanthium	Dichanthium aristatum
1083	NC_035010	Poales	Poaceae	Andropogoninae	Diectomis	Diectomis fastigiata
1288	OK637269	Poales	Poaceae	Anthephorinae	Digitaria	Digitaria sanguinalis
1440	MK593550	Poales	Poaceae	Anthephorinae	Digitaria	Digitaria glauca
17	NC_087700	Poales	Poaceae	Andropogoninae	Diheteropogon	Diheteropogon grandiflorus
18	NC_087699	Poales	Poaceae	Andropogoninae	Diheteropogon	Diheteropogon filifolius
50	NC_087667	Poales	Poaceae	Andropogoninae	Diheteropogon	Diheteropogon hagerupii
52	NC_087665	Poales	Poaceae	Andropogoninae	Diheteropogon	Diheteropogon amplectens
1529	KU291497	Poales	Poaceae	Diheteropogon	Diheteropogon amplectens	Diheteropogon amplectens var. catangensis
1078	NC_035020	Poales	Poaceae	Ischaeminae	Dimeria	Dimeria ornithopoda
1391	MT610048	Poales	Poaceae	Ischaeminae	Dimeria	Dimeria lawsonii
476	NC_062405	Poales	Poaceae	Eleusininae	Dinebra	Dinebra chinensis
552	NC_068114	Poales	Poaceae	Eleusininae	Dinebra	Dinebra panicea
555	NC_068111	Poales	Poaceae	Eleusininae	Dinebra	Dinebra retroflexa
554	NC_068112	Poales	Poaceae	Eleusininae	Diplachne	Diplachne fusca
1318	MK775249	Poales	Poaceae	Hordeinae	Douglasdeweya	Douglasdeweya deweyi
1042	NC_035526	Poales	Poaceae	Arundineae	Dregeochloa	Dregeochloa pumila
961	NC_037167	Poales	Poaceae	Arundinariinae	Drepanostachyum	Drepanostachyum falcatum
1450	MN310559	Poales	Poaceae	Arundinariinae	Drepanostachyum	Drepanostachyum semiorbiculatum
1012	NC_036128	Poales	Poaceae	Boivinellinae	Echinochloa	Echinochloa stagnina
1013	NC_036127	Poales	Poaceae	Boivinellinae	Echinochloa	Echinochloa ugandensis
1110	NC_032383	Poales	Poaceae	Boivinellinae	Echinochloa	Echinochloa colona
1112	NC_032379	Poales	Poaceae	Boivinellinae	Echinochloa	Echinochloa esculenta
1164	NC_029827	Poales	Poaceae	Boivinellinae	Echinochloa	Echinochloa frumentacea
1170	NC_028719	Poales	Poaceae	Boivinellinae	Echinochloa	Echinochloa crus-galli
1191	NC_024643	Poales	Poaceae	Boivinellinae	Echinochloa	Echinochloa oryzicola
1337	MW672445	Poales	Poaceae	Boivinellinae	Echinochloa	Echinochloa haploclada
1534	KR822686	Poales	Poaceae	Echinochloa	Echinochloa crus-galli	Echinochloa crus-galli var. praticola
1535	KR822685	Poales	Poaceae	Echinochloa	Echinochloa crus-galli	Echinochloa crus-galli var. crus-galli
752	NC_054197	Poales	Poaceae	Ehrharteae	Ehrharta	Ehrharta erecta
977	NC_036715	Poales	Poaceae	Ehrharteae	Ehrharta	Ehrharta bulbosa
743	NC_056927	Poales	Poaceae	Eleusininae	Eleusine	Eleusine coracana
1154	NC_030486	Poales	Poaceae	Eleusininae	Eleusine	Eleusine indica
1365	MT610077	Poales	Poaceae	Tripsacinae	Elionurus	Elionurus muticus
1386	MT610053	Poales	Poaceae	Tripsacinae	Elionurus	Elionurus tripsacoides
49	NC_087668	Poales	Poaceae	Andropogoninae	Elymandra	Elymandra archaelymandra
1394	MT610044	Poales	Poaceae	Andropogoninae	Elymandra	Elymandra grallata
1498	MH181214	Poales	Poaceae	Andropogoninae	Elymandra	Elymandra subulata
1501	MH181166	Poales	Poaceae	Andropogoninae	Elymandra	Elymandra androphila
447	NC_066043	Poales	Poaceae	Hordeinae	Elymus	Elymus gmelinii
461	NC_066045	Poales	Poaceae	Hordeinae	Elymus	Elymus pendulinus
462	NC_066042	Poales	Poaceae	Hordeinae	Elymus	Elymus strictus
646	NC_061050	Poales	Poaceae	Hordeinae	Elymus	[Elymus] atratus
717	NC_058919	Poales	Poaceae	Hordeinae	Elymus	Elymus sibiricus
724	NC_058753	Poales	Poaceae	Hordeinae	Elymus	Elymus repens
725	NC_058750	Poales	Poaceae	Hordeinae	Elymus	Elymus virginicus
726	NC_058749	Poales	Poaceae	Hordeinae	Elymus	Elymus hystrix
806	NC_050404	Poales	Poaceae	Hordeinae	Elymus	Elymus trachycaulus
1278	MZ337548	Poales	Poaceae	Hordeinae	Elymus	Elymus magellanicus
1297	MT644146	Poales	Poaceae	Hordeinae	Elymus	[Elymus] sinosubmuticus
1298	MT644143	Poales	Poaceae	Hordeinae	Elymus	[Elymus] submuticus
1299	MT644142	Poales	Poaceae	Hordeinae	Elymus	[Elymus] breviaristatus
1306	MT385864	Poales	Poaceae	Hordeinae	Elymus	Elymus tauri
1308	MT385862	Poales	Poaceae	Hordeinae	Elymus	Elymus stipifolius
1309	MT385861	Poales	Poaceae	Hordeinae	Elymus	Elymus libanoticus
1310	MT385860	Poales	Poaceae	Hordeinae	Elymus	Elymus cognatus
1316	MK775252	Poales	Poaceae	Hordeinae	Elymus	Elymus ciliaris
1320	MN703670	Poales	Poaceae	Hordeinae	Elymus	Elymus longiaristatus
1321	MN703669	Poales	Poaceae	Hordeinae	Elymus	Elymus grandis
1317	MK775251	Poales	Poaceae	Elymus	Elymus nodosus	Elymus nodosus subsp. caespitosus
1041	NC_035527	Poales	Poaceae	Crinipinae	Elytrophorus	Elytrophorus globularis
714	NC_059726	Poales	Poaceae	Cotteinae	Enneapogon	Enneapogon desvauxii
896	NC_042837	Poales	Poaceae	Cotteinae	Enneapogon	Enneapogon caerulescens
1008	NC_036682	Poales	Poaceae	Cotteinae	Enneapogon	Enneapogon oblongus
553	NC_068113	Poales	Poaceae	Eleusininae	Enteropogon	Enteropogon dolichostachyus
899	NC_042834	Poales	Poaceae	Eleusininae	Enteropogon	Enteropogon ramosus
1014	NC_036126	Poales	Poaceae	Boivinellinae	Entolasia	Entolasia imbricata
119	NC_086738	Poales	Poaceae	Eragrostidinae	Eragrostis	Eragrostis nutans
698	NC_059742	Poales	Poaceae	Eragrostidinae	Eragrostis	Eragrostis harpachnoides
699	NC_059741	Poales	Poaceae	Eragrostidinae	Eragrostis	Eragrostis unioloides
700	NC_059740	Poales	Poaceae	Eragrostidinae	Eragrostis	Eragrostis tenella
701	NC_059739	Poales	Poaceae	Eragrostidinae	Eragrostis	Eragrostis rufinerva
702	NC_059738	Poales	Poaceae	Eragrostidinae	Eragrostis	Eragrostis pilosa
703	NC_059737	Poales	Poaceae	Eragrostidinae	Eragrostis	Eragrostis perennans
704	NC_059736	Poales	Poaceae	Eragrostidinae	Eragrostis	Eragrostis nigra
705	NC_059735	Poales	Poaceae	Eragrostidinae	Eragrostis	Eragrostis nevinii
706	NC_059734	Poales	Poaceae	Eragrostidinae	Eragrostis	Eragrostis japonica
707	NC_059733	Poales	Poaceae	Eragrostidinae	Eragrostis	Eragrostis fractus
708	NC_059732	Poales	Poaceae	Eragrostidinae	Eragrostis	Eragrostis ferruginea
709	NC_059731	Poales	Poaceae	Eragrostidinae	Eragrostis	Eragrostis cylindrica
710	NC_059730	Poales	Poaceae	Eragrostidinae	Eragrostis	Eragrostis cilianensis
711	NC_059729	Poales	Poaceae	Eragrostidinae	Eragrostis	Eragrostis brownii
712	NC_059728	Poales	Poaceae	Eragrostidinae	Eragrostis	Eragrostis autumnalis
713	NC_059727	Poales	Poaceae	Eragrostidinae	Eragrostis	Eragrostis atrovirens
900	NC_042833	Poales	Poaceae	Eragrostidinae	Eragrostis	Eragrostis tenellula
901	NC_042832	Poales	Poaceae	Eragrostidinae	Eragrostis	Eragrostis setifolia
1426	MN781018	Poales	Poaceae	Eragrostidinae	Eragrostis	Eragrostis tef
976	NC_036716	Poales	Poaceae	Ratzeburgiinae	Eremochloa	Eremochloa ophiuroides
1071	NC_035028	Poales	Poaceae	Ratzeburgiinae	Eremochloa	Eremochloa ciliaris
1075	NC_035023	Poales	Poaceae	Ratzeburgiinae	Eremochloa	Eremochloa eriopoda
686	NC_059827	Poales	Poaceae	Anthistiriinae	Eremopogon	Eremopogon tuberculatus
687	NC_059826	Poales	Poaceae	Anthistiriinae	Eremopogon	Eremopogon foveolatus
1506	MH285852	Poales	Poaceae	Hordeinae	Eremopyrum	Eremopyrum triticeum
1507	MH285851	Poales	Poaceae	Hordeinae	Eremopyrum	Eremopyrum distans
902	NC_042831	Poales	Poaceae	Eriachneae	Eriachne	Eriachne tenuiculmis
916	NC_041574	Poales	Poaceae	Eriachneae	Eriachne	Eriachne triodioides
917	NC_041573	Poales	Poaceae	Eriachneae	Eriachne	Eriachne sulcata
918	NC_041572	Poales	Poaceae	Eriachneae	Eriachne	Eriachne semiciliata
919	NC_041571	Poales	Poaceae	Eriachneae	Eriachne	Eriachne schultziana
920	NC_041570	Poales	Poaceae	Eriachneae	Eriachne	Eriachne pauciflora
921	NC_041569	Poales	Poaceae	Eriachneae	Eriachne	Eriachne pallescens
922	NC_041568	Poales	Poaceae	Eriachneae	Eriachne	Eriachne obtusa
923	NC_041567	Poales	Poaceae	Eriachneae	Eriachne	Eriachne melicacea
924	NC_041566	Poales	Poaceae	Eriachneae	Eriachne	Eriachne major
925	NC_041565	Poales	Poaceae	Eriachneae	Eriachne	Eriachne glauca
926	NC_041564	Poales	Poaceae	Eriachneae	Eriachne	Eriachne compacta
927	NC_041563	Poales	Poaceae	Eriachneae	Eriachne	Eriachne ciliata
928	NC_041562	Poales	Poaceae	Eriachneae	Eriachne	Eriachne burkittii
929	NC_041561	Poales	Poaceae	Eriachneae	Eriachne	Eriachne basedowii
930	NC_041560	Poales	Poaceae	Eriachneae	Eriachne	Eriachne axillaris
931	NC_041559	Poales	Poaceae	Eriachneae	Eriachne	Eriachne avenacea
932	NC_041558	Poales	Poaceae	Eriachneae	Eriachne	Eriachne aristidea
933	NC_041557	Poales	Poaceae	Eriachneae	Eriachne	Eriachne agrostidea
935	NC_041249	Poales	Poaceae	Eriachneae	Eriachne	Eriachne triseta
1039	NC_035529	Poales	Poaceae	Eriachneae	Eriachne	Eriachne mucronata
1098	NC_034791	Poales	Poaceae	Eriachneae	Eriachne	Eriachne armittii
1455	MH036280	Poales	Poaceae	Eriachneae	Eriachne	Eriachne stipacea
1122	NC_030624	Poales	Poaceae	Melinidinae	Eriochloa	Eriochloa meyeriana
905	NC_042751	Poales	Poaceae	Andropogoneae incertae sedis	Eriochrysis	Eriochrysis pallida
1161	NC_029883	Poales	Poaceae	Andropogoneae incertae sedis	Eriochrysis	Eriochrysis laxa
1162	NC_029882	Poales	Poaceae	Andropogoneae incertae sedis	Eriochrysis	Eriochrysis cf. cayennensis 365-2
1395	MT610043	Poales	Poaceae	Anthistiriinae	Euclasta	Euclasta condylotricha
1070	NC_035031	Poales	Poaceae	Apludinae	Eulalia	Eulalia siamensis
1136	NC_030503	Poales	Poaceae	Eulalia	Eulalia aurea (Bory) Kunth	1830
1057	NC_035049	Poales	Poaceae	Ischaeminae	Eulaliopsis	Eulaliopsis binata
1006	NC_036685	Poales	Poaceae	Eleusininae	Eustachys	Eustachys glauca
1499	MH181196	Poales	Poaceae	Andropogoninae	Exotheca	Exotheca abyssinica
473	NC_063836	Poales	Poaceae	Arundinariinae	Fargesia	Fargesia dracocephala
519	NC_072282	Poales	Poaceae	Arundinariinae	Fargesia	Fargesia angustissima
859	NC_043945	Poales	Poaceae	Arundinariinae	Fargesia	Fargesia edulis
860	NC_043944	Poales	Poaceae	Arundinariinae	Fargesia	Fargesia grossa
862	NC_043942	Poales	Poaceae	Arundinariinae	Fargesia	Fargesia daminiu
864	NC_043940	Poales	Poaceae	Arundinariinae	Fargesia	Fargesia funiushanensis
865	NC_043939	Poales	Poaceae	Arundinariinae	Fargesia	Fargesia setosa
866	NC_043938	Poales	Poaceae	Arundinariinae	Fargesia	Fargesia hygrophila
867	NC_043937	Poales	Poaceae	Arundinariinae	Fargesia	Fargesia fungosa
868	NC_043936	Poales	Poaceae	Arundinariinae	Fargesia	Fargesia canaliculata
869	NC_043935	Poales	Poaceae	Arundinariinae	Fargesia	Fargesia stenoclada
870	NC_043934	Poales	Poaceae	Arundinariinae	Fargesia	Fargesia communis
871	NC_043933	Poales	Poaceae	Arundinariinae	Fargesia	Fargesia decurvata
877	NC_043891	Poales	Poaceae	Arundinariinae	Fargesia	Fargesia albocerea
944	NC_040002	Poales	Poaceae	Arundinariinae	Fargesia	Fargesia qinlingensis
1103	NC_034747	Poales	Poaceae	Arundinariinae	Fargesia	Fargesia denudata
1202	NC_024717	Poales	Poaceae	Arundinariinae	Fargesia	Fargesia yunnanensis
1203	NC_024716	Poales	Poaceae	Arundinariinae	Fargesia	Fargesia spathacea
1204	NC_024715	Poales	Poaceae	Arundinariinae	Fargesia	Fargesia nitida
1261	OM049560	Poales	Poaceae	Loliinae	Festuca	Festuca pratensis
1430	MN309824	Poales	Poaceae	Loliinae	Festuca	Festuca ovina
1432	MN309822	Poales	Poaceae	Loliinae	Festuca	Festuca brevipila
1428	MN309826	Poales	Poaceae	Festuca	Festuca rubra	Festuca rubra subsp. fallax
1429	MN309825	Poales	Poaceae	Festuca	Festuca rubra	Festuca rubra subsp. rubra
1431	MN309823	Poales	Poaceae	Festuca	Festuca rubra	Festuca rubra subsp. litoralis
946	NC_039983	Poales	Poaceae	Olyrinae	Froesiochloa	Froesiochloa boutelouoides
1201	NC_024718	Poales	Poaceae	Arundinariinae	Gaoligongshania	Gaoligongshania megalothyrsa
1056	NC_035051	Poales	Poaceae	Arundinelleae	Garnotia	Garnotia tenella
1061	NC_035042	Poales	Poaceae	Arundinelleae	Garnotia	Garnotia thailandica
1439	MK593551	Poales	Poaceae	Garnotia	Garnotia stricta	Garnotia stricta var. longiseta
1005	NC_036686	Poales	Poaceae	Agrostidinae	Gastridium	Gastridium ventricosum
501	NC_072534	Poales	Poaceae	Arundinariinae	Gelidocalamus	Gelidocalamus multifolius
502	NC_072533	Poales	Poaceae	Arundinariinae	Gelidocalamus	Gelidocalamus zixingensis
503	NC_072532	Poales	Poaceae	Arundinariinae	Gelidocalamus	Gelidocalamus stellatus
588	NC_062076	Poales	Poaceae	Arundinariinae	Gelidocalamus	Gelidocalamus kunishii
1200	NC_024719	Poales	Poaceae	Arundinariinae	Gelidocalamus	Gelidocalamus tessellatus
1343	MN205550	Poales	Poaceae	Arundinariinae	Gelidocalamus	Gelidocalamus xunwuensis
1059	NC_035046	Poales	Poaceae	Germainiinae	Germainia	Germainia capitata
766	NC_050779	Poales	Poaceae	Bambusinae	Gigantochloa	Gigantochloa verticillata
767	NC_050778	Poales	Poaceae	Bambusinae	Gigantochloa	Gigantochloa nigrociliata
768	NC_050777	Poales	Poaceae	Bambusinae	Gigantochloa	Gigantochloa atroviolacea
779	NC_050765	Poales	Poaceae	Bambusinae	Gigantochloa	Gigantochloa albociliata
795	NC_050749	Poales	Poaceae	Bambusinae	Gigantochloa	Gigantochloa parviflora
1293	MK679788	Poales	Poaceae	Bambusinae	Gigantochloa	Gigantochloa glabrata
804	NC_050406	Poales	Poaceae	Meliceae	Glyceria	Glyceria arkansana
805	NC_050405	Poales	Poaceae	Meliceae	Glyceria	Glyceria septentrionalis
1438	MK593552	Poales	Poaceae	Ratzeburgiinae	Glyphochloa	Glyphochloa forficulata
1165	NC_029749	Poales	Poaceae	Guaduinae	Guadua	Guadua angustifolia
1167	NC_029232	Poales	Poaceae	Guaduinae	Guadua	Guadua chacoensis
602	NC_061344	Poales	Poaceae	Guaduelleae	Guaduella	Guaduella oblonga
603	NC_061343	Poales	Poaceae	Guaduelleae	Guaduella	Guaduella macrostachys
1004	NC_036687	Poales	Poaceae	Gynerieae	Gynerium	Gynerium sagittatum
1354	MT610093	Poales	Poaceae	Ratzeburgiinae	Hackelochloa	Hackelochloa granularis
1524	MF035985	Poales	Poaceae	Molininae	Hakonechloa	Hakonechloa macra
1003	NC_036688	Poales	Poaceae	Tripogoninae	Halopyrum	Halopyrum mucronatum
1377	MT610063	Poales	Poaceae	Ratzeburgiinae	Hemarthria	Hemarthria uncinata
1384	MT610055	Poales	Poaceae	Ratzeburgiinae	Hemarthria	Hemarthria compressa
1385	MT610054	Poales	Poaceae	Ratzeburgiinae	Hemarthria	Hemarthria altissima
1505	MH285853	Poales	Poaceae	Hordeinae	Henrardia	Henrardia persica
1504	MH285854	Poales	Poaceae	Hordeinae	Heteranthelium	Heteranthelium piliferum
683	NC_059830	Poales	Poaceae	Anthistiriinae	Heteropogon	Heteropogon ritchiei
684	NC_059829	Poales	Poaceae	Anthistiriinae	Heteropogon	Heteropogon melanocarpus
685	NC_059828	Poales	Poaceae	Anthistiriinae	Heteropogon	Heteropogon fischerianus
1073	NC_035025	Poales	Poaceae	Anthistiriinae	Heteropogon	Heteropogon triticeus
1090	NC_035027	Poales	Poaceae	Anthistiriinae	Heteropogon	Heteropogon contortus
1016	NC_036124	Poales	Poaceae	Paspalinae	Hildaea	Hildaea pallens
861	NC_043943	Poales	Poaceae	Arundinariinae	Himalayacalamus	Himalayacalamus gyirongensis
863	NC_043941	Poales	Poaceae	Arundinariinae	Himalayacalamus	Himalayacalamus collaris
836	NC_044487	Poales	Poaceae	Hickeliinae	Hitchcockella	Hitchcockella baronii
1002	NC_036689	Poales	Poaceae	Holcinae	Holcus	Holcus lanatus
1001	NC_036690	Poales	Poaceae	Arthropogoninae	Homolepis	Homolepis isocalycia
1015	NC_036125	Poales	Poaceae	Arthropogoninae	Homolepis	Homolepis aturensis
1364	MT610079	Poales	Poaceae	Apludinae	Homozeugos	Homozeugos eylesii
184	NC_081960	Poales	Poaceae	Hordeinae	Hordeum	Hordeum pusillum
742	NC_056985	Poales	Poaceae	Hordeinae	Hordeum	Hordeum vulgare
854	NC_043839	Poales	Poaceae	Hordeinae	Hordeum	Hordeum bogdanii
1332	MZ397993	Poales	Poaceae	Hordeinae	Hordeum	Hordeum jubatum
1423	MT386010	Poales	Poaceae	Hordeinae	Hordeum	Hordeum brevisubulatum
1411	MW266081	Poales	Poaceae	Hordeum	Hordeum brevisubulatum	Hordeum brevisubulatum subsp. violaceum
354	OR063947	Poales	Poaceae	Hordeum	Hordeum marinum	Hordeum marinum subsp. marinum
907	NC_042692	Poales	Poaceae	Hordeum	Hordeum vulgare	Hordeum vulgare subsp. spontaneum
1240	NC_008590	Poales	Poaceae	Hordeum	Hordeum vulgare	Hordeum vulgare subsp. vulgare
1339	MW531731	Poales	Poaceae	Hordeum vulgare	Hordeum vulgare subsp. vulgare	Hordeum vulgare var. distichon
1340	MW531730	Poales	Poaceae	Hordeum vulgare	Hordeum vulgare subsp. vulgare	Hordeum vulgare f. agriocrithon
1000	NC_036691	Poales	Poaceae	Phyllorachideae	Humbertochloa	Humbertochloa bambusiuscula
736	NC_058302	Poales	Poaceae	Zizaniinae	Hygroryza	Hygroryza aristata
20	NC_087697	Poales	Poaceae	Andropogoninae	Hyparrhenia	Hyparrhenia collina
21	NC_087696	Poales	Poaceae	Andropogoninae	Hyparrhenia	Hyparrhenia umbrosa
22	NC_087695	Poales	Poaceae	Andropogoninae	Hyparrhenia	Hyparrhenia tuberculata
23	NC_087694	Poales	Poaceae	Andropogoninae	Hyparrhenia	Hyparrhenia tamba
24	NC_087693	Poales	Poaceae	Andropogoninae	Hyparrhenia	Hyparrhenia smithiana
25	NC_087692	Poales	Poaceae	Andropogoninae	Hyparrhenia	Hyparrhenia schimperi
26	NC_087691	Poales	Poaceae	Andropogoninae	Hyparrhenia	Hyparrhenia rudis
27	NC_087690	Poales	Poaceae	Andropogoninae	Hyparrhenia	Hyparrhenia poecilotricha
28	NC_087689	Poales	Poaceae	Andropogoninae	Hyparrhenia	Hyparrhenia pilgeriana
29	NC_087688	Poales	Poaceae	Andropogoninae	Hyparrhenia	Hyparrhenia niariensis
30	NC_087687	Poales	Poaceae	Andropogoninae	Hyparrhenia	Hyparrhenia newtonii
31	NC_087686	Poales	Poaceae	Andropogoninae	Hyparrhenia	Hyparrhenia multiplex
32	NC_087685	Poales	Poaceae	Andropogoninae	Hyparrhenia	Hyparrhenia mobukensis
33	NC_087684	Poales	Poaceae	Andropogoninae	Hyparrhenia	Hyparrhenia madaropoda
34	NC_087683	Poales	Poaceae	Andropogoninae	Hyparrhenia	Hyparrhenia lithophila
35	NC_087682	Poales	Poaceae	Andropogoninae	Hyparrhenia	Hyparrhenia involucrata
36	NC_087681	Poales	Poaceae	Andropogoninae	Hyparrhenia	Hyparrhenia hirta
37	NC_087680	Poales	Poaceae	Andropogoninae	Hyparrhenia	Hyparrhenia gazensis
38	NC_087679	Poales	Poaceae	Andropogoninae	Hyparrhenia	Hyparrhenia finitima
39	NC_087678	Poales	Poaceae	Andropogoninae	Hyparrhenia	Hyparrhenia filipendula
40	NC_087677	Poales	Poaceae	Andropogoninae	Hyparrhenia	Hyparrhenia figariana
41	NC_087676	Poales	Poaceae	Andropogoninae	Hyparrhenia	Hyparrhenia dregeana
42	NC_087675	Poales	Poaceae	Andropogoninae	Hyparrhenia	Hyparrhenia dichroa
43	NC_087674	Poales	Poaceae	Andropogoninae	Hyparrhenia	Hyparrhenia cymbaria
44	NC_087673	Poales	Poaceae	Andropogoninae	Hyparrhenia	Hyparrhenia cyanescens
45	NC_087672	Poales	Poaceae	Andropogoninae	Hyparrhenia	Hyparrhenia confinis
46	NC_087671	Poales	Poaceae	Andropogoninae	Hyparrhenia	Hyparrhenia bracteata
47	NC_087670	Poales	Poaceae	Andropogoninae	Hyparrhenia	Hyparrhenia arrhenobasis
48	NC_087669	Poales	Poaceae	Andropogoninae	Hyparrhenia	Hyparrhenia anamesa
86	OQ518228	Poales	Poaceae	Andropogoninae	Hyparrhenia	Hyparrhenia rufa
87	OQ518206	Poales	Poaceae	Andropogoninae	Hyparrhenia	Hyparrhenia diplandra
942	NC_040112	Poales	Poaceae	Andropogoninae	Hyparrhenia	Hyparrhenia variabilis
1121	NC_030625	Poales	Poaceae	Andropogoninae	Hyparrhenia	Hyparrhenia subplumosa
1481	MH181199	Poales	Poaceae	Andropogoninae	Hyparrhenia	Hyparrhenia anemopaegma
1485	MH181190	Poales	Poaceae	Andropogoninae	Hyparrhenia	Hyparrhenia bagirmica
1491	MH181179	Poales	Poaceae	Andropogoninae	Hyparrhenia	Hyparrhenia papillipes
1496	MH181167	Poales	Poaceae	Andropogoninae	Hyparrhenia	Hyparrhenia violascens
88	OQ518200	Poales	Poaceae	Hyparrhenia	Hyparrhenia confinis	Hyparrhenia confinis var. nudiglumis
1372	MT610070	Poales	Poaceae	Andropogoninae	Hyperthelia	Hyperthelia dissoluta
1152	NC_030487	Poales	Poaceae	Germainiinae	Imperata	Imperata cylindrica
168	NC_084179	Poales	Poaceae	Arundinariinae	Indocalamus	Indocalamus hirtivaginatus
386	NC_079918	Poales	Poaceae	Arundinariinae	Indocalamus	Indocalamus emeiensis
744	NC_056925	Poales	Poaceae	Arundinariinae	Indocalamus	Indocalamus tongchunensis
1199	NC_024720	Poales	Poaceae	Arundinariinae	Indocalamus	Indocalamus wilsonii
133	NC_085231	Poales	Poaceae	Arundinariinae	Indosasa	Indosasa longispicata
500	NC_072553	Poales	Poaceae	Arundinariinae	Indosasa	Indosasa lipoensis
825	NC_046587	Poales	Poaceae	Arundinariinae	Indosasa	Indosasa gigantea
1198	NC_024721	Poales	Poaceae	Arundinariinae	Indosasa	Indosasa sinica
1260	OK558536	Poales	Poaceae	Arundinariinae	Indosasa	Indosasa crassiflora
1397	MW463058	Poales	Poaceae	Arundinariinae	Indosasa	Indosasa hispida
1038	NC_035530	Poales	Poaceae	Isachneae	Isachne	Isachne albens
1151	NC_030488	Poales	Poaceae	Ischaeminae	Ischaemum	Ischaemum afrum
1378	MT610062	Poales	Poaceae	Ischaeminae	Ischaemum	Ischaemum rugosum
677	NC_059836	Poales	Poaceae	Anthistiriinae	Iseilema	Iseilema vaginiflorum
678	NC_059835	Poales	Poaceae	Anthistiriinae	Iseilema	Iseilema prostratum
679	NC_059834	Poales	Poaceae	Anthistiriinae	Iseilema	Iseilema membranaceum
680	NC_059833	Poales	Poaceae	Anthistiriinae	Iseilema	Iseilema laxum
681	NC_059832	Poales	Poaceae	Anthistiriinae	Iseilema	Iseilema hubbardii
682	NC_059831	Poales	Poaceae	Anthistiriinae	Iseilema	Iseilema anthephoroides
1135	NC_030611	Poales	Poaceae	Anthistiriinae	Iseilema	Iseilema macratherum
1436	MK593556	Poales	Poaceae	Arundinelleae	Jansenella	Jansenella neglecta
1437	MK593555	Poales	Poaceae	Arundinelleae	Jansenella	Jansenella griffithiana
1381	MT610059	Poales	Poaceae	Andropogoneae incertae sedis	Jardinea	Jardinea congoensis
131	NC_085716	Poales	Poaceae	Cynodonteae incertae sedis	Kampochloa	Kampochloa brachyphylla
722	NC_058788	Poales	Poaceae	Hordeinae	Kengyilia	Kengyilia grandiglumis
723	NC_058787	Poales	Poaceae	Hordeinae	Kengyilia	Kengyilia hirsuta
1322	MN703667	Poales	Poaceae	Hordeinae	Kengyilia	Kengyilia melanthera
1323	MN703666	Poales	Poaceae	Hordeinae	Kengyilia	Kengyilia laxiflora
1324	MN703665	Poales	Poaceae	Hordeinae	Kengyilia	Kengyilia rigidula
1325	MN703663	Poales	Poaceae	Hordeinae	Kengyilia	Kengyilia stenachyra
1326	MN703662	Poales	Poaceae	Hordeinae	Kengyilia	Kengyilia thoroldiana
1327	MN703661	Poales	Poaceae	Hordeinae	Kengyilia	Kengyilia mutica
1328	MN703660	Poales	Poaceae	Hordeinae	Kengyilia	Kengyilia kokonorica
1329	MN703658	Poales	Poaceae	Hordeinae	Kengyilia	Kengyilia alatavica
1084	NC_035009	Poales	Poaceae	Andropogoneae incertae sedis	Kerriochloa	Kerriochloa siamensis
488	NC_065056	Poales	Poaceae	Aveninae	Koeleria	Koeleria spicata
506	NC_072345	Poales	Poaceae	Aveninae	Koeleria	Koeleria macrantha
960	NC_037168	Poales	Poaceae	Dactylidinae	Lamarckia	Lamarckia aurea
1017	NC_036123	Poales	Poaceae	Boivinellinae	Lasiacis	Lasiacis nigra
1435	MK593557	Poales	Poaceae	Andropogoneae incertae sedis	Lasiurus	Lasiurus scindicus
1211	NC_024106	Poales	Poaceae	Lecomtelleae	Lecomtella	Lecomtella madagascariensis
837	NC_044486	Poales	Poaceae	Oryzinae	Leersia	Leersia perrieri
1099	NC_034766	Poales	Poaceae	Oryzinae	Leersia	Leersia japonica
716	NC_058993	Poales	Poaceae	Molinieae incertae sedis	Leptagrostis	Leptagrostis schimperiana
1108	NC_033864	Poales	Poaceae	Phareae	Leptaspis	Leptaspis zeylanica
1109	NC_033863	Poales	Poaceae	Phareae	Leptaspis	Leptaspis banksii
959	NC_037169	Poales	Poaceae	Eleusininae	Leptochloa	Leptochloa pluriflora
999	NC_036692	Poales	Poaceae	Eleusininae	Leptochloa	Leptochloa virgata
551	NC_068115	Poales	Poaceae	Eleusininae	Lepturus	Lepturus repens
471	NC_063961	Poales	Poaceae	Hordeinae	Leymus	Leymus mollis
472	NC_063960	Poales	Poaceae	Hordeinae	Leymus	Leymus arenarius
531	NC_068586	Poales	Poaceae	Hordeinae	Leymus	Leymus secalinus
532	NC_068585	Poales	Poaceae	Hordeinae	Leymus	Leymus ramosus
533	NC_068584	Poales	Poaceae	Hordeinae	Leymus	Leymus karelinii
534	NC_068583	Poales	Poaceae	Hordeinae	Leymus	Leymus angustus
535	NC_068544	Poales	Poaceae	Hordeinae	Leymus	Leymus cinereus
536	NC_068543	Poales	Poaceae	Hordeinae	Leymus	Leymus condensatus
537	NC_068542	Poales	Poaceae	Hordeinae	Leymus	Leymus coreanus
727	NC_058748	Poales	Poaceae	Hordeinae	Leymus	Leymus duthiei
728	NC_058747	Poales	Poaceae	Hordeinae	Leymus	Leymus racemosus
729	NC_058746	Poales	Poaceae	Hordeinae	Leymus	Leymus multicaulis
730	NC_058745	Poales	Poaceae	Hordeinae	Leymus	Leymus triticoides
731	NC_058744	Poales	Poaceae	Hordeinae	Leymus	Leymus komarovii
832	NC_044900	Poales	Poaceae	Hordeinae	Leymus	Leymus chinensis
1257	MZ595318	Poales	Poaceae	Hordeinae	Leymus	Leymus paboanus
1271	MW628904	Poales	Poaceae	Leymus	Leymus racemosus	Leymus racemosus subsp. sabulosus
1051	NC_035531	Poales	Poaceae	Isachneae	Limnopoa	Limnopoa meeboldii
956	NC_037519	Poales	Poaceae	Littledaleeae	Littledalea	Littledalea alaica
957	NC_037497	Poales	Poaceae	Littledaleeae	Littledalea	Littledalea przevalskyi
1009	NC_036350	Poales	Poaceae	Littledaleeae	Littledalea	Littledalea racemosa
1291	MW218960	Poales	Poaceae	Littledaleeae	Littledalea	Littledalea tibetica
172	OQ935427	Poales	Poaceae	Loliinae	Lolium	Lolium arundinaceum
1239	NC_009950	Poales	Poaceae	Loliinae	Lolium	Lolium perenne
1027	NC_036113	Poales	Poaceae	Tristachyideae	Loudetia	Loudetia simplex
1134	NC_030612	Poales	Poaceae	Tristachyideae	Loudetiopsis	Loudetiopsis kerstingii
1348	MT610100	Poales	Poaceae	Rhytachninae	Loxodera	Loxodera bovonei
1353	MT610094	Poales	Poaceae	Rhytachninae	Loxodera	Loxodera caespitosa
998	NC_036693	Poales	Poaceae	Lygeeae	Lygeum	Lygeum spartum
445	NC_062947	Poales	Poaceae	Stipeae	Macrochloa	Macrochloa tenacissima
1150	NC_030489	Poales	Poaceae	Melinidinae	Megathyrsus	Megathyrsus maximus
997	NC_036694	Poales	Poaceae	Tripogoninae	Melanocenchris	Melanocenchris abyssinica
809	NC_050212	Poales	Poaceae	Meliceae	Melica	Melica scabrosa
1434	MK593558	Poales	Poaceae	Melinidinae	Melinis	Melinis minutiflora
798	NC_050745	Poales	Poaceae	Bambusinae	Melocalamus	Melocalamus arrectus
1419	MK679793	Poales	Poaceae	Melocalamus	Melocalamus compactiflorus	Melocalamus compactiflorus var. fimbriatus
1018	NC_036122	Poales	Poaceae	Danthonieae	Merxmuellera	Merxmuellera tsaratananensis
550	NC_068116	Poales	Poaceae	Eleusininae	Microchloa	Microchloa indica
1393	MT610045	Poales	Poaceae	Andropogoneae incertae sedis	Microstegium	Microstegium vimineum
1031	NC_035753	Poales	Poaceae	Saccharinae	Miscanthus	Miscanthus x giganteus
1032	NC_035751	Poales	Poaceae	Saccharinae	Miscanthus	Miscanthus junceus
1033	NC_035750	Poales	Poaceae	Saccharinae	Miscanthus	Miscanthus floridulus
1168	NC_028721	Poales	Poaceae	Saccharinae	Miscanthus	Miscanthus sinensis
1169	NC_028720	Poales	Poaceae	Saccharinae	Miscanthus	Miscanthus sacchariflorus
1375	MT610066	Poales	Poaceae	Saccharinae	Miscanthus	Miscanthus ecklonii
1519	LN869228	Poales	Poaceae	Miscanthus	Miscanthus sinensis	Miscanthus sinensis subsp. sinensis
1521	LN869220	Poales	Poaceae	Miscanthus	Miscanthus sinensis	Miscanthus sinensis subsp. condensatus
1520	LN869224	Poales	Poaceae	Miscanthus sinensis	Miscanthus sinensis subsp. sinensis	Miscanthus sinensis var. purpurascens
1066	NC_035036	Poales	Poaceae	Ratzeburgiinae	Mnesithea	Mnesithea helferi
1359	MT610086	Poales	Poaceae	Ratzeburgiinae	Mnesithea	Mnesithea lepidura
1369	MT610073	Poales	Poaceae	Ratzeburgiinae	Mnesithea	Mnesithea formosa
1387	MT610052	Poales	Poaceae	Ratzeburgiinae	Mnesithea	Mnesithea selloana
1523	MF035989	Poales	Poaceae	Molininae	Molinia	Molinia caerulea
1522	MF035991	Poales	Poaceae	Arundineae	Monachather	Monachather paradoxus
1368	MT610074	Poales	Poaceae	Andropogoninae	Monocymbium	Monocymbium ceresiiforme
1500	MH181170	Poales	Poaceae	Andropogoninae	Monocymbium	Monocymbium lanceolatum
547	NC_068119	Poales	Poaceae	Muhlenbergiinae	Muhlenbergia	Muhlenbergia ramosa
548	NC_068118	Poales	Poaceae	Muhlenbergiinae	Muhlenbergia	Muhlenbergia japonica
549	NC_068117	Poales	Poaceae	Muhlenbergiinae	Muhlenbergia	Muhlenbergia huegelii
996	NC_036695	Poales	Poaceae	Nardeae	Nardus	Nardus stricta
995	NC_036696	Poales	Poaceae	Stipeae	Nassella	Nassella hyalina
1458	KX792500	Poales	Poaceae	Stipeae	Nassella	Nassella trichotoma
1518	MF480752	Poales	Poaceae	Stipeae	Nassella	Nassella neesiana
164	OQ791224	Poales	Poaceae	Bambusinae	Neomicrocalamus	Neomicrocalamus prainii
777	NC_050767	Poales	Poaceae	Bambusinae	Neomicrocalamus	Neomicrocalamus yunnanensis
760	NC_051964	Poales	Poaceae	Stipeae	Neotrinia	Neotrinia splendens
953	NC_039450	Poales	Poaceae	Neurachninae	Neurachne	Neurachne muelleri
1212	NC_024262	Poales	Poaceae	Triraphideae	Neyraudia	Neyraudia reynaudiana
695	NC_059752	Poales	Poaceae	Arundinariinae	Oligostachyum	Oligostachyum sulcatum
1197	NC_024722	Poales	Poaceae	Arundinariinae	Oligostachyum	Oligostachyum shiuyingianum
1149	NC_030490	Poales	Poaceae	Arthropogoninae	Oncorachis	Oncorachis ramosa
1148	NC_030491	Poales	Poaceae	Boivinellinae	Oplismenus	Oplismenus hirtellus
546	NC_068120	Poales	Poaceae	Orininae	Orinus	Orinus thoroldii
891	NC_042859	Poales	Poaceae	Orininae	Orinus	Orinus kokonoricus
1292	MW186709	Poales	Poaceae	Orininae	Orinus	Orinus intermedius
994	NC_036697	Poales	Poaceae	Tripogoninae	Oropetium	Oropetium aristatum
401	OX485189	Poales	Poaceae	Oryzinae	Oryza	Oryza meyeriana
757	NC_053278	Poales	Poaceae	Oryzinae	Oryza	Oryza malampuzhaensis
758	NC_053277	Poales	Poaceae	Oryzinae	Oryza	Oryza schlechteri
759	NC_053276	Poales	Poaceae	Oryzinae	Oryza	Oryza neocaledonica
973	NC_036934	Poales	Poaceae	Oryzinae	Oryza	Oryza coarctata
1094	NC_034761	Poales	Poaceae	Oryzinae	Oryza	Oryza grandiglumis
1095	NC_034760	Poales	Poaceae	Oryzinae	Oryza	Oryza alta
1096	NC_034759	Poales	Poaceae	Oryzinae	Oryza	Oryza eichingeri
1097	NC_034758	Poales	Poaceae	Oryzinae	Oryza	Oryza rhizomatis
1100	NC_034764	Poales	Poaceae	Oryzinae	Oryza	Oryza ridleyi
1101	NC_034763	Poales	Poaceae	Oryzinae	Oryza	Oryza longiglumis
1102	NC_034762	Poales	Poaceae	Oryzinae	Oryza	Oryza latifolia
1118	NC_031333	Poales	Poaceae	Oryzinae	Oryza	Oryza sativa
1153	NC_030596	Poales	Poaceae	Oryzinae	Oryza	Oryza brachyantha
1155	NC_030298	Poales	Poaceae	Oryzinae	Oryza	Oryza minuta
1176	NC_027676	Poales	Poaceae	Oryzinae	Oryza	Oryza punctata
1178	NC_027463	Poales	Poaceae	Oryzinae	Oryza	Oryza officinalis
1179	NC_027462	Poales	Poaceae	Oryzinae	Oryza	Oryza longistaminata
1180	NC_027461	Poales	Poaceae	Oryzinae	Oryza	Oryza glumipatula
1181	NC_027460	Poales	Poaceae	Oryzinae	Oryza	Oryza barthii
1210	NC_024608	Poales	Poaceae	Oryzinae	Oryza	Oryza australiensis
1227	NC_017835	Poales	Poaceae	Oryzinae	Oryza	Oryza rufipogon
1228	NC_016927	Poales	Poaceae	Oryzinae	Oryza	Oryza meridionalis
1259	OL912836	Poales	Poaceae	Oryzinae	Oryza	Oryza nivara
1277	MW528842	Poales	Poaceae	Oryzinae	Oryza	Oryza glaberrima
1526	KF359920	Poales	Poaceae	Oryza	Oryza meyeriana	Oryza meyeriana var. granulata
166	OP729774	Poales	Poaceae	Oryza	Oryza sativa	Oryza sativa Indica Group
1242	NC_005973	Poales	Poaceae	Oryza	Oryza sativa	Oryza sativa f. spontanea
1253	LC739565	Poales	Poaceae	Oryza	Oryza sativa	Oryza sativa Japonica Group
1412	MW001303	Poales	Poaceae	Oryza sativa	Oryza sativa Japonica Group	Oryza sativa temperate japonica subgroup
1533	KT289404	Poales	Poaceae	Oryza sativa	Oryza sativa Japonica Group	Oryza sativa tropical japonica subgroup
1536	KT289403	Poales	Poaceae	Oryza sativa	Oryza sativa Japonica Group	Oryza sativa aromatic subgroup
1147	NC_030492	Poales	Poaceae	Otachyriinae	Otachyrium	Otachyrium versicolor
970	NC_037158	Poales	Poaceae	Eleusininae	Oxychloris	Oxychloris scariosa
1383	MT610057	Poales	Poaceae	Rhytachninae	Oxyrhachis	Oxyrhachis gracillima
947	NC_039619	Poales	Poaceae	Panicinae	Panicum	Panicum incomtum
1019	NC_036121	Poales	Poaceae	Panicinae	Panicum	Panicum lycopodioides
1021	NC_036119	Poales	Poaceae	Panicinae	Panicum	Panicum leptolomoides
1511	CM009689	Poales	Poaceae	Panicinae	Panicum	Panicum miliaceum
1020	NC_036120	Poales	Poaceae	Panicum	Panicum incertae sedis	Panicum pygmaeum
1111	NC_032378	Poales	Poaceae	Panicum	Panicum sect. Dichotomiflora	Panicum sumatrense
390	OQ873414	Poales	Poaceae	Panicum	Panicum sect. Hiantes	Panicum virgatum
1146	NC_030493	Poales	Poaceae	Panicum	Panicum sect. Panicum	Panicum capillare
1068	NC_035033	Poales	Poaceae	Andropogoneae incertae sedis	Parahyparrhenia	Parahyparrhenia siamensis
152	PP072314	Poales	Poaceae	Paspalinae	Paspalum	Paspalum vaginatum
948	NC_039464	Poales	Poaceae	Paspalinae	Paspalum	Paspalum ionanthum
949	NC_039463	Poales	Poaceae	Paspalinae	Paspalum	Paspalum inaequivalve
950	NC_039461	Poales	Poaceae	Paspalinae	Paspalum	Paspalum simplex
951	NC_039460	Poales	Poaceae	Paspalinae	Paspalum	Paspalum minus
952	NC_039459	Poales	Poaceae	Paspalinae	Paspalum	Paspalum juergensii
954	NC_039449	Poales	Poaceae	Paspalinae	Paspalum	Paspalum virgatum
955	NC_039448	Poales	Poaceae	Paspalinae	Paspalum	Paspalum pubiflorum
1026	NC_036114	Poales	Poaceae	Paspalinae	Paspalum	Paspalum paniculatum
1132	NC_030614	Poales	Poaceae	Paspalinae	Paspalum	Paspalum dilatatum
1143	NC_030496	Poales	Poaceae	Paspalinae	Paspalum	Paspalum glaziovii
1144	NC_030495	Poales	Poaceae	Paspalinae	Paspalum	Paspalum fimbriatum
1312	MT094441	Poales	Poaceae	Paspalinae	Paspalum	Paspalum floridanum
1367	MT610075	Poales	Poaceae	Paspalinae	Paspalum	Paspalum malacophyllum
527	NC_070349	Poales	Poaceae	Cenchrinae	Pennisetum	Pennisetum giganteum
543	NC_068123	Poales	Poaceae	Perotidinae	Perotis	Perotis rara
544	NC_068122	Poales	Poaceae	Perotidinae	Perotis	Perotis indica
545	NC_068121	Poales	Poaceae	Perotidinae	Perotis	Perotis hordeiformis
1037	NC_035533	Poales	Poaceae	Danthonieae	Phaenanthoecium	Phaenanthoecium koestlinii
1276	OM201309	Poales	Poaceae	Phaenospermateae	Phaenosperma	Phaenosperma globosum
1217	NC_023245	Poales	Poaceae	Phareae	Pharus	Pharus lappulaceus
1225	NC_021372	Poales	Poaceae	Phareae	Pharus	Pharus latifolius
1036	NC_035534	Poales	Poaceae	Eriachneae	Pheidochloa	Pheidochloa gracilis
480	NC_067044	Poales	Poaceae	Phleinae	Phleum	Phleum pratense
1220	NC_022958	Poales	Poaceae	Molininae	Phragmites	Phragmites australis
649	NC_060780	Poales	Poaceae	Phragmites	Phragmites australis	Phragmites australis subsp. americanus
650	NC_060779	Poales	Poaceae	Phragmites	Phragmites australis	Phragmites australis subsp. berlandieri
993	NC_036698	Poales	Poaceae	Phyllorachideae	Phyllorachis	Phyllorachis sagittata
99	PP453783	Poales	Poaceae	Arundinariinae	Phyllostachys	Phyllostachys edulis
187	LC681536	Poales	Poaceae	Arundinariinae	Phyllostachys	Phyllostachys reticulata
446	NC_066717	Poales	Poaceae	Arundinariinae	Phyllostachys	Phyllostachys bissetii
454	NC_064526	Poales	Poaceae	Arundinariinae	Phyllostachys	Phyllostachys heteroclada
458	OQ024229	Poales	Poaceae	Arundinariinae	Phyllostachys	Phyllostachys violascens
521	NC_071867	Poales	Poaceae	Arundinariinae	Phyllostachys	Phyllostachys aureosulcata
563	NC_067631	Poales	Poaceae	Arundinariinae	Phyllostachys	Phyllostachys praecox
564	NC_067630	Poales	Poaceae	Arundinariinae	Phyllostachys	Phyllostachys incarnata
578	NC_062169	Poales	Poaceae	Arundinariinae	Phyllostachys	Phyllostachys lithophila
579	NC_062168	Poales	Poaceae	Arundinariinae	Phyllostachys	Phyllostachys makinoi
756	NC_053647	Poales	Poaceae	Arundinariinae	Phyllostachys	Phyllostachys angusta
761	NC_051535	Poales	Poaceae	Arundinariinae	Phyllostachys	Phyllostachys glauca
1208	NC_024669	Poales	Poaceae	Arundinariinae	Phyllostachys	Phyllostachys sulphurea
1229	NC_016699	Poales	Poaceae	Arundinariinae	Phyllostachys	Phyllostachys propinqua
95	PP453784	Poales	Poaceae	Phyllostachys	Phyllostachys edulis	Phyllostachys edulis f. gracilis
96	PP453782	Poales	Poaceae	Phyllostachys	Phyllostachys edulis	Phyllostachys edulis f. nabeshimana
97	PP453781	Poales	Poaceae	Phyllostachys	Phyllostachys edulis	Phyllostachys edulis f. holochrysa
98	PP453780	Poales	Poaceae	Phyllostachys	Phyllostachys edulis	Phyllostachys edulis f. exaurita
170	OR597504	Poales	Poaceae	Phyllostachys	Phyllostachys edulis	Phyllostachys edulis f. luteosulcata
1252	OP069829	Poales	Poaceae	Phyllostachys	Phyllostachys edulis	Phyllostachys edulis f. tubiformis
1254	OM084949	Poales	Poaceae	Phyllostachys	Phyllostachys edulis	Phyllostachys edulis f. bicolor
1417	MW075109	Poales	Poaceae	Phyllostachys	Phyllostachys heteroclada	Phyllostachys heteroclada f. solida
1231	NC_015826	Poales	Poaceae	Phyllostachys	Phyllostachys nigra	Phyllostachys nigra var. henonis
992	NC_036699	Poales	Poaceae	Stipeae	Piptatherum	Piptatherum songaricum
1142	NC_030497	Poales	Poaceae	Otachyriinae	Plagiantha	Plagiantha tenella
433	NC_067033	Poales	Poaceae	Arundinariinae	Pleioblastus	Pleioblastus triangulata
493	NC_069220	Poales	Poaceae	Arundinariinae	Pleioblastus	Pleioblastus ovatoauritus
496	NC_069217	Poales	Poaceae	Arundinariinae	Pleioblastus	Pleioblastus variegatus
497	NC_069216	Poales	Poaceae	Arundinariinae	Pleioblastus	Pleioblastus argenteostriatus
876	NC_043892	Poales	Poaceae	Arundinariinae	Pleioblastus	Pleioblastus amarus
1195	NC_024723	Poales	Poaceae	Arundinariinae	Pleioblastus	Pleioblastus maculatus
459	NC_067045	Poales	Poaceae	Poinae	Poa	Poa supina
738	NC_057962	Poales	Poaceae	Poinae	Poa	Poa pratensis
800	NC_050408	Poales	Poaceae	Poinae	Poa	Poa saltuensis
802	NC_050409	Poales	Poaceae	Poinae	Poa	Poa wolfii
803	NC_050407	Poales	Poaceae	Poinae	Poa	Poa alsodes
1163	NC_029881	Poales	Poaceae	Germainiinae	Pogonatherum	Pogonatherum paniceum
1087	NC_035044	Poales	Poaceae	Chionachninae	Polytoca	Polytoca digitata
1379	MT610061	Poales	Poaceae	Apludinae	Polytrias	Polytrias indica
1040	NC_035528	Poales	Poaceae	Crinipinae	Pratochloa	Pratochloa walteri
969	NC_037159	Poales	Poaceae	Oryzinae	Prosphytochloa	Prosphytochloa prehensilis
831	NC_045871	Poales	Poaceae	Hordeinae	Psathyrostachys	Psathyrostachys huashanica
855	NC_043838	Poales	Poaceae	Hordeinae	Psathyrostachys	Psathyrostachys juncea
676	NC_059837	Poales	Poaceae	Andropogoneae incertae sedis	Pseudanthistiria	Pseudanthistiria umbellata
1072	NC_035026	Poales	Poaceae	Andropogoneae incertae sedis	Pseudopogonatherum	Pseudopogonatherum contortum
1307	MT385863	Poales	Poaceae	Hordeinae	Pseudoroegneria	Pseudoroegneria strigosa
1502	MH285855	Poales	Poaceae	Hordeinae	Pseudoroegneria	Pseudoroegneria spicata
14	OP874595	Poales	Poaceae	Arundinariinae	Pseudosasa	Pseudosasa japonica
427	NC_063504	Poales	Poaceae	Arundinariinae	Pseudosasa	Pseudosasa usawae
1074	NC_035024	Poales	Poaceae	Saccharinae	Pseudosorghum	Pseudosorghum fasciculare
749	NC_054281	Poales	Poaceae	Coleanthinae	Puccinellia	Puccinellia distans
1216	NC_023449	Poales	Poaceae	Atractocarpeae	Puelia	Puelia olyriformis
945	NC_039984	Poales	Poaceae	Olyrinae	Rehia	Rehia nervata
1433	MK593560	Poales	Poaceae	Paspaleae incertae sedis	Reynaudia	Reynaudia filiformis
991	NC_036700	Poales	Poaceae	Arthrostylidiinae	Rhipidocladum	Rhipidocladum pittieri
1356	MT610090	Poales	Poaceae	Rhytachninae	Rhytachne	Rhytachne rottboellioides
1131	NC_030615	Poales	Poaceae	Rottboelliinae	Rottboellia	Rottboellia cochinchinensis
962	NC_037166	Poales	Poaceae	Danthonieae	Rytidosperma	Rytidosperma pallidum
990	NC_036701	Poales	Poaceae	Danthonieae	Rytidosperma	Rytidosperma semiannulare
177	NC_082231	Poales	Poaceae	Saccharinae	Saccharum	Saccharum fulvum
528	NC_070069	Poales	Poaceae	Saccharinae	Saccharum	Saccharum narenga
1022	NC_036118	Poales	Poaceae	Saccharinae	Saccharum	Saccharum hildebrandtii
1427	MN342163	Poales	Poaceae	Saccharinae	Saccharum	Saccharum perrieri
1241	NC_006084	Poales	Poaceae	unclassified Saccharum officinarum complex	Saccharum hybrid cultivar	Saccharum hybrid cultivar NCo 310
1243	NC_005878	Poales	Poaceae	unclassified Saccharum officinarum complex	Saccharum hybrid cultivar	Saccharum hybrid cultivar SP80-3280
1425	BK010677	Poales	Poaceae	unclassified Saccharum officinarum complex	Saccharum hybrid cultivar	Saccharum hybrid cultivar B4362
1527	KX507245	Poales	Poaceae	unclassified Saccharum officinarum complex	Saccharum hybrid cultivar	Saccharum hybrid cultivar RB867515
101	PP454216	Poales	Poaceae	Saccharum	Saccharum officinarum species complex	Saccharum spontaneum
504	NC_072525	Poales	Poaceae	Saccharum	Saccharum officinarum species complex	Saccharum sinense
505	NC_072524	Poales	Poaceae	Saccharum	Saccharum officinarum species complex	Saccharum barberi
1055	NC_035224	Poales	Poaceae	Saccharum	Saccharum officinarum species complex	Saccharum officinarum
989	NC_036702	Poales	Poaceae	Paniceae incertae sedis	Sacciolepis	Sacciolepis indica
1345	MT942630	Poales	Poaceae	Sorghinae	Sarga	Sarga versicolor
1206	NC_024713	Poales	Poaceae	Arundinariinae	Sarocalamus	Sarocalamus faberi
1023	NC_036117	Poales	Poaceae	Aristideae	Sartidia	Sartidia isaloensis
1183	NC_027147	Poales	Poaceae	Aristideae	Sartidia	Sartidia dewinteri
1184	NC_027146	Poales	Poaceae	Aristideae	Sartidia	Sartidia perrieri
0	NC_088555	Poales	Poaceae	Arundinariinae	Sasa	Sasa oblongula
173	OR188081	Poales	Poaceae	Arundinariinae	Sasa	Sasa quelpaertensis
494	NC_069219	Poales	Poaceae	Arundinariinae	Sasaella	Sasaella kogasensis
495	NC_069218	Poales	Poaceae	Arundinariinae	Sasaella	Sasaella glabra
988	NC_036703	Poales	Poaceae	Danthonieae	Schismus	Schismus arabicus
801	NC_050410	Poales	Poaceae	Meliceae	Schizachne	Schizachne purpurascens
19	NC_087698	Poales	Poaceae	Andropogoninae	Schizachyrium	Schizachyrium platyphyllum
67	NC_087650	Poales	Poaceae	Andropogoninae	Schizachyrium	Schizachyrium yangambiense
68	NC_087649	Poales	Poaceae	Andropogoninae	Schizachyrium	Schizachyrium sulcatum
69	NC_087648	Poales	Poaceae	Andropogoninae	Schizachyrium	Schizachyrium semitectum
70	NC_087647	Poales	Poaceae	Andropogoninae	Schizachyrium	Schizachyrium scabriflorum
71	NC_087646	Poales	Poaceae	Andropogoninae	Schizachyrium	Schizachyrium rupestre
72	NC_087645	Poales	Poaceae	Andropogoninae	Schizachyrium	Schizachyrium ruderale
73	NC_087644	Poales	Poaceae	Andropogoninae	Schizachyrium	Schizachyrium pulchellum
74	NC_087643	Poales	Poaceae	Andropogoninae	Schizachyrium	Schizachyrium pseudeulalia
75	NC_087642	Poales	Poaceae	Andropogoninae	Schizachyrium	Schizachyrium nodulosum
76	NC_087641	Poales	Poaceae	Andropogoninae	Schizachyrium	Schizachyrium malacostachyum
77	NC_087640	Poales	Poaceae	Andropogoninae	Schizachyrium	Schizachyrium maclaudii
78	NC_087639	Poales	Poaceae	Andropogoninae	Schizachyrium	Schizachyrium hatschbachii
79	NC_087638	Poales	Poaceae	Andropogoninae	Schizachyrium	Schizachyrium gresicola
80	NC_087637	Poales	Poaceae	Andropogoninae	Schizachyrium	Schizachyrium gracilipes
81	NC_087636	Poales	Poaceae	Andropogoninae	Schizachyrium	Schizachyrium fragile
82	NC_087635	Poales	Poaceae	Andropogoninae	Schizachyrium	Schizachyrium condensatum
83	NC_087634	Poales	Poaceae	Andropogoninae	Schizachyrium	Schizachyrium djalonicum
84	NC_087633	Poales	Poaceae	Andropogoninae	Schizachyrium	Schizachyrium crinizonatum
85	NC_087632	Poales	Poaceae	Andropogoninae	Schizachyrium	Schizachyrium delicatum
91	OQ518170	Poales	Poaceae	Andropogoninae	Schizachyrium	Schizachyrium tenerum
92	OQ518165	Poales	Poaceae	Andropogoninae	Schizachyrium	Schizachyrium sanguineum
94	OQ518147	Poales	Poaceae	Andropogoninae	Schizachyrium	Schizachyrium brevifolium
492	NC_073108	Poales	Poaceae	Andropogoninae	Schizachyrium	Schizachyrium glaziovii
688	NC_059825	Poales	Poaceae	Andropogoninae	Schizachyrium	Schizachyrium delavayi
938	NC_040130	Poales	Poaceae	Andropogoninae	Schizachyrium	Schizachyrium cirratum
1060	NC_035045	Poales	Poaceae	Andropogoninae	Schizachyrium	Schizachyrium imberbe
1064	NC_035039	Poales	Poaceae	Andropogoninae	Schizachyrium	Schizachyrium spicatum
1069	NC_035032	Poales	Poaceae	Andropogoninae	Schizachyrium	Schizachyrium scoparium
1089	NC_035029	Poales	Poaceae	Andropogoninae	Schizachyrium	Schizachyrium exile
1463	MH181234	Poales	Poaceae	Andropogoninae	Schizachyrium	Schizachyrium microstachyum
1466	MH181228	Poales	Poaceae	Andropogoninae	Schizachyrium	Schizachyrium claudopus
1472	MH181217	Poales	Poaceae	Andropogoninae	Schizachyrium	Schizachyrium reedii
1476	MH181208	Poales	Poaceae	Andropogoninae	Schizachyrium	Schizachyrium salzmannii
1478	MH181205	Poales	Poaceae	Andropogoninae	Schizachyrium	Schizachyrium cubense
1480	MH181201	Poales	Poaceae	Andropogoninae	Schizachyrium	Schizachyrium lomaense
1486	MH181189	Poales	Poaceae	Andropogoninae	Schizachyrium	Schizachyrium thollonii
1489	MH181183	Poales	Poaceae	Andropogoninae	Schizachyrium	Schizachyrium ursulus
93	OQ518163	Poales	Poaceae	Schizachyrium	Schizachyrium sanguineum	Schizachyrium sanguineum var. hirtiflorum
560	NC_068071	Poales	Poaceae	Melocanninae	Schizostachyum	Schizostachyum auriculatum
568	NC_063135	Poales	Poaceae	Melocanninae	Schizostachyum	Schizostachyum diffusum
598	NC_061348	Poales	Poaceae	Phareae	Scrotochloa	Scrotochloa urceolata
1224	NC_021761	Poales	Poaceae	Hordeinae	Secale	Secale cereale
1301	LC649171	Poales	Poaceae	Hordeinae	Secale	Secale sylvestre
398	OQ700975	Poales	Poaceae	Secale	Secale cereale	Secale cereale subsp. vavilovii
1264	OL688773	Poales	Poaceae	Secale	Secale cereale	Secale cereale subsp. segetale
397	OQ700976	Poales	Poaceae	Secale	Secale strictum	Secale strictum subsp. anatolicum
399	OQ700974	Poales	Poaceae	Secale	Secale strictum	Secale strictum subsp. africanum
1263	OL979486	Poales	Poaceae	Secale	Secale strictum	Secale strictum subsp. strictum
1311	LC645210	Poales	Poaceae	Secale	Secale strictum	Secale strictum subsp. kuprijanovii
1366	MT610076	Poales	Poaceae	Andropogoneae incertae sedis	Sehima	Sehima nervosum
123	NC_086645	Poales	Poaceae	Cenchrinae	Setaria	Setaria verticillata
1145	NC_030494	Poales	Poaceae	Cenchrinae	Setaria	Setaria geminata
1172	NC_028075	Poales	Poaceae	Cenchrinae	Setaria	Setaria viridis
1446	MK348609	Poales	Poaceae	Cenchrinae	Setaria	Setaria italica
183	NC_082098	Poales	Poaceae	Arundinariinae	Sinobambusa	Sinobambusa rubroligula
392	OQ220334	Poales	Poaceae	Arundinariinae	Sinobambusa	Sinobambusa intermedia
394	OQ130031	Poales	Poaceae	Arundinariinae	Sinobambusa	Sinobambusa striata
1290	MN783350	Poales	Poaceae	Arundinariinae	Sinobambusa	Sinobambusa tootsik
391	OQ236108	Poales	Poaceae	Sinobambusa	Sinobambusa tootsik	Sinobambusa tootsik var. laeta
393	OQ160796	Poales	Poaceae	Sinobambusa tootsik	Sinobambusa tootsik var. tootsik	Sinobambusa tootsik f. albostriata
1141	NC_030498	Poales	Poaceae	Apludinae	Sorghastrum	Sorghastrum nutans
1363	MT610080	Poales	Poaceae	Apludinae	Sorghastrum	Sorghastrum elliottii
167	NC_084351	Poales	Poaceae	Sorghinae	Sorghum	Sorghum halepense
171	OR683744	Poales	Poaceae	Sorghinae	Sorghum	Sorghum bicolor
174	NC_082845	Poales	Poaceae	Sorghinae	Sorghum	Sorghum bicolor x Sorghum bicolor subsp. drummondii
904	NC_042789	Poales	Poaceae	Sorghinae	Sorghum	Sorghum propinquum
1076	NC_035022	Poales	Poaceae	Sorghinae	Sorghum	Sorghum mekongense
1215	NC_023800	Poales	Poaceae	Sorghinae	Sorghum	Sorghum timorense
1362	MT610082	Poales	Poaceae	Sorghinae	Sorghum	Sorghum sorghoides
188	OR353656	Poales	Poaceae	Sorghum	Sorghum bicolor	Sorghum bicolor subsp. drummondii
429	NC_064989	Poales	Poaceae	Andropogoneae incertae sedis	Spodiopogon	Spodiopogon sagittifolius
540	NC_068126	Poales	Poaceae	Sporobolinae	Sporobolus	Sporobolus virginicus
541	NC_068125	Poales	Poaceae	Sporobolinae	Sporobolus	Sporobolus fertilis
542	NC_068124	Poales	Poaceae	Sporobolinae	Sporobolus	Sporobolus diandrus
557	NC_068109	Poales	Poaceae	Sporobolinae	Sporobolus	Sporobolus aculeatus
911	NC_042237	Poales	Poaceae	Sporobolinae	Sporobolus	Sporobolus helvolus
1177	NC_027650	Poales	Poaceae	Sporobolinae	Sporobolus	Sporobolus maritimus
1424	MT311317	Poales	Poaceae	Sporobolinae	Sporobolus	Sporobolus alterniflorus
1140	NC_030499	Poales	Poaceae	Otachyriinae	Steinchisma	Steinchisma laxum
1346	MT942629	Poales	Poaceae	Otachyriinae	Steinchisma	Steinchisma decipiens
826	NC_046568	Poales	Poaceae	Cenchrinae	Stenotaphrum	Stenotaphrum subulatum
987	NC_036704	Poales	Poaceae	Cenchrinae	Stenotaphrum	Stenotaphrum secundatum
440	NC_062959	Poales	Poaceae	Stipeae	Stipa	Stipa basiplumosa
441	NC_062953	Poales	Poaceae	Stipeae	Stipa	Stipa penicillata
442	NC_062951	Poales	Poaceae	Stipeae	Stipa	Stipa ehrenbergiana
443	NC_062956	Poales	Poaceae	Stipeae	Stipa	Stipa pulcherrima
444	NC_062955	Poales	Poaceae	Stipeae	Stipa	Stipa przewalskyi
448	NC_065504	Poales	Poaceae	Stipeae	Stipa	Stipa bungeana
455	NC_062954	Poales	Poaceae	Stipeae	Stipa	Stipa pennata
456	NC_062949	Poales	Poaceae	Stipeae	Stipa	Stipa breviflora
457	NC_062946	Poales	Poaceae	Stipeae	Stipa	Stipa sibirica
507	NC_072325	Poales	Poaceae	Stipeae	Stipa	Stipa baicalensis
508	NC_072324	Poales	Poaceae	Stipeae	Stipa	Stipa grandis
509	NC_072323	Poales	Poaceae	Stipeae	Stipa	Stipa capillacea
510	NC_072322	Poales	Poaceae	Stipeae	Stipa	Stipa aliena
511	NC_072321	Poales	Poaceae	Stipeae	Stipa	Stipa roborowskyi
512	NC_072320	Poales	Poaceae	Stipeae	Stipa	Stipa tianschanica
513	NC_072319	Poales	Poaceae	Stipeae	Stipa	Stipa regeliana
514	NC_072318	Poales	Poaceae	Stipeae	Stipa	Stipa subsessiliflora
515	NC_072317	Poales	Poaceae	Stipeae	Stipa	Stipa sareptana
516	NC_072316	Poales	Poaceae	Stipeae	Stipa	Stipa kirghisorum
517	NC_072315	Poales	Poaceae	Stipeae	Stipa	Stipa krylovii
573	NC_062957	Poales	Poaceae	Stipeae	Stipa	Stipa tzveleviana
574	NC_062952	Poales	Poaceae	Stipeae	Stipa	Stipa klimesii
575	NC_062950	Poales	Poaceae	Stipeae	Stipa	Stipa caucasica x Stipa magnifica
576	NC_062948	Poales	Poaceae	Stipeae	Stipa	Stipa austroaltaica
1166	NC_029390	Poales	Poaceae	Stipeae	Stipa	Stipa purpurea
1171	NC_028444	Poales	Poaceae	Stipeae	Stipa	Stipa lipskyi
1245	OP681438	Poales	Poaceae	Stipeae	Stipa	Stipa caucasica
1246	OP681436	Poales	Poaceae	Stipeae	Stipa	Stipa capillata
1247	OP681435	Poales	Poaceae	Stipeae	Stipa	Stipa orientalis
1275	MT850060	Poales	Poaceae	Stipeae	Stipa	Stipa arabica
1248	OP681434	Poales	Poaceae	Stipa	Stipa caucasica	Stipa caucasica subsp. glareosa
1273	MT850070	Poales	Poaceae	Stipa	Stipa macroglossa	Stipa macroglossa var. kazachstanica
1274	MT850066	Poales	Poaceae	Stipa	Stipa pennata	Stipa pennata subsp. eriocaulis
1249	OP681433	Poales	Poaceae	Stipa	Stipa tianschanica	Stipa tianschanica var. klemenzii
1250	OP677550	Poales	Poaceae	Stipa	Stipa tianschanica	Stipa tianschanica var. gobica
652	NC_060727	Poales	Poaceae	Aristideae	Stipagrostis	Stipagrostis pennata
1028	NC_036112	Poales	Poaceae	Aristideae	Stipagrostis	Stipagrostis hirtigluma
1516	MF460973	Poales	Poaceae	Stipagrostis	Stipagrostis uniplumis	Stipagrostis uniplumis var. uniplumis
491	NC_062958	Poales	Poaceae	Stipeae	Stipellula	Stipellula capensis
1105	NC_033862	Poales	Poaceae	Streptochaeteae	Streptochaeta	Streptochaeta spicata
1007	NC_036683	Poales	Poaceae	Streptogyneae	Streptogyna	Streptogyna americana
1024	NC_036116	Poales	Poaceae	Paspalinae	Streptostachys	Streptostachys asperifolia
1035	NC_035535	Poales	Poaceae	Crinipinae	Styppeiochloa	Styppeiochloa gynoglossa
968	NC_037160	Poales	Poaceae	Hordeinae	Taeniatherum	Taeniatherum caput-medusae
1503	MH285856	Poales	Poaceae	Taeniatherum	Taeniatherum caput-medusae	Taeniatherum caput-medusae subsp. caput-medusae
146	NC_085342	Poales	Poaceae	Bambuseae incertae sedis	Temochloa	Temochloa liliana
647	NC_061040	Poales	Poaceae	Arundinariinae	Thamnocalamus	Thamnocalamus unispiculatus
1194	NC_024724	Poales	Poaceae	Arundinariinae	Thamnocalamus	Thamnocalamus spathiflorus
1357	MT610089	Poales	Poaceae	Andropogoneae incertae sedis	Thelepogon	Thelepogon elegans
432	NC_066807	Poales	Poaceae	Anthistiriinae	Themeda	Themeda avenacea
522	NC_071817	Poales	Poaceae	Anthistiriinae	Themeda	Themeda japonica
669	NC_059844	Poales	Poaceae	Anthistiriinae	Themeda	Themeda tremula
670	NC_059843	Poales	Poaceae	Anthistiriinae	Themeda	Themeda strigosa
671	NC_059842	Poales	Poaceae	Anthistiriinae	Themeda	Themeda mooneyi
672	NC_059841	Poales	Poaceae	Anthistiriinae	Themeda	Themeda minor
673	NC_059840	Poales	Poaceae	Anthistiriinae	Themeda	Themeda huttonensis
674	NC_059839	Poales	Poaceae	Anthistiriinae	Themeda	Themeda cymbaria
675	NC_059838	Poales	Poaceae	Anthistiriinae	Themeda	Themeda anathera
1049	NC_035492	Poales	Poaceae	Anthistiriinae	Themeda	Themeda quadrivalvis
1077	NC_035021	Poales	Poaceae	Anthistiriinae	Themeda	Themeda villosa
1079	NC_035019	Poales	Poaceae	Anthistiriinae	Themeda	Themeda arguens
1081	NC_035016	Poales	Poaceae	Anthistiriinae	Themeda	Themeda triandra
1092	NC_035014	Poales	Poaceae	Anthistiriinae	Themeda	Themeda arundinacea
812	NC_049154	Poales	Poaceae	Triticinae	Thinopyrum	Thinopyrum obtusiflorum
813	NC_049153	Poales	Poaceae	Triticinae	Thinopyrum	Thinopyrum intermedium
852	NC_043841	Poales	Poaceae	Triticinae	Thinopyrum	Thinopyrum elongatum
856	NC_043837	Poales	Poaceae	Triticinae	Thinopyrum	Thinopyrum bessarabicum
1315	MK775253	Poales	Poaceae	Triticinae	Thinopyrum	Thinopyrum pycnanthum
1130	NC_030616	Poales	Poaceae	Neurachninae	Thyridolepis	Thyridolepis xerophila
1350	MT610098	Poales	Poaceae	Ratzeburgiinae	Thyrsia	Thyrsia inflata
561	NC_068070	Poales	Poaceae	Bambusinae	Thyrsostachys	Thyrsostachys oliveri
1400	MW366537	Poales	Poaceae	Bambusinae	Thyrsostachys	Thyrsostachys siamensis
1376	MT610065	Poales	Poaceae	Apludinae	Trachypogon	Trachypogon chevalieri
538	NC_068128	Poales	Poaceae	Traginae	Tragus	Tragus mongolorum
539	NC_068127	Poales	Poaceae	Traginae	Tragus	Tragus berteronianus
903	NC_042830	Poales	Poaceae	Traginae	Tragus	Tragus australianus
986	NC_036705	Poales	Poaceae	Danthonieae	Tribolium	Tribolium hispidum
985	NC_036706	Poales	Poaceae	Melinidinae	Tricholaena	Tricholaena monachne
178	NC_082219	Poales	Poaceae	Trichoneurinae	Trichoneura	Trichoneura weberbaueri
179	NC_082218	Poales	Poaceae	Trichoneurinae	Trichoneura	Trichoneura schlechteri
180	NC_082217	Poales	Poaceae	Trichoneurinae	Trichoneura	Trichoneura mollis
181	NC_082216	Poales	Poaceae	Trichoneurinae	Trichoneura	Trichoneura lindleyana
182	NC_082215	Poales	Poaceae	Trichoneurinae	Trichoneura	Trichoneura eleusinoides
346	OR242660	Poales	Poaceae	Trichoneurinae	Trichoneura	Trichoneura grandiglumis
565	NC_067610	Poales	Poaceae	Trichoneurinae	Trichoneura	Trichoneura ciliata
1270	MW699773	Poales	Poaceae	Trikeraia	Trikeraia hookeri	Trikeraia hookeri var. hookeri
878	NC_042872	Poales	Poaceae	Triodiinae	Triodia	Triodia lanigera
879	NC_042871	Poales	Poaceae	Triodiinae	Triodia	Triodia scintillans
880	NC_042870	Poales	Poaceae	Triodiinae	Triodia	Triodia schinzii
881	NC_042869	Poales	Poaceae	Triodiinae	Triodia	Triodia vanleeuwenii
882	NC_042868	Poales	Poaceae	Triodiinae	Triodia	Triodia tomentosa
883	NC_042867	Poales	Poaceae	Triodiinae	Triodia	Triodia rigidissima
884	NC_042866	Poales	Poaceae	Triodiinae	Triodia	Triodia plurinervata
885	NC_042865	Poales	Poaceae	Triodiinae	Triodia	Triodia mallota
886	NC_042864	Poales	Poaceae	Triodiinae	Triodia	Triodia longiceps
887	NC_042863	Poales	Poaceae	Triodiinae	Triodia	Triodia glabra
888	NC_042862	Poales	Poaceae	Triodiinae	Triodia	Triodia concinna
889	NC_042861	Poales	Poaceae	Triodiinae	Triodia	Triodia chichesterensis
890	NC_042860	Poales	Poaceae	Triodiinae	Triodia	Triodia basedowii
967	NC_037161	Poales	Poaceae	Triodiinae	Triodia	Triodia wiseana
971	NC_037157	Poales	Poaceae	Triodiinae	Triodia	Triodia stipoides
102	PP454215	Poales	Poaceae	Andropogoneae incertae sedis	Tripidium	Tripidium arundinaceum
906	NC_042735	Poales	Poaceae	Andropogoneae incertae sedis	Tripidium	Tripidium ravennae
653	NC_060400	Poales	Poaceae	Tripogoninae	Tripogon	Tripogon chinensis
654	NC_060399	Poales	Poaceae	Tripogoninae	Tripogon	Tripogon bromoides
893	NC_042840	Poales	Poaceae	Tripogoninae	Tripogonella	Tripogonella loliiformis
741	NC_057482	Poales	Poaceae	Tripsacinae	Tripsacum	Tripsacum laxum
972	NC_037087	Poales	Poaceae	Tripsacinae	Tripsacum	Tripsacum dactyloides
1351	MT610096	Poales	Poaceae	Tripsacinae	Tripsacum	Tripsacum australe
1371	MT610071	Poales	Poaceae	Tripsacinae	Tripsacum	Tripsacum andersonii
1374	MT610068	Poales	Poaceae	Tripsacinae	Tripsacum	Tripsacum cundinamarcae
1380	MT610060	Poales	Poaceae	Tripsacinae	Tripsacum	Tripsacum peruvianum
1360	MT610084	Poales	Poaceae	Tripsacum	Tripsacum dactyloides	Tripsacum dactyloides var. floridanum
898	NC_042835	Poales	Poaceae	Triraphideae	Triraphis	Triraphis mollis
1050	NC_035532	Poales	Poaceae	Triraphideae	Triraphis	Triraphis longipes
984	NC_036708	Poales	Poaceae	Tristachyideae	Tristachya	Tristachya leucothrix
1025	NC_036115	Poales	Poaceae	Tristachyideae	Tristachya	Tristachya humbertii
155	OR936057	Poales	Poaceae	Triticinae	Triticum	Triticum timopheevii
157	OR936050	Poales	Poaceae	Triticinae	Triticum	Triticum monococcum
822	NC_046698	Poales	Poaceae	Triticinae	Triticum	Triticum zhukovskyi
1186	NC_025955	Poales	Poaceae	Triticinae	Triticum	Triticum macha
1187	NC_024814	Poales	Poaceae	Triticinae	Triticum	Triticum turgidum
1223	NC_021762	Poales	Poaceae	Triticinae	Triticum	Triticum urartu
1268	MW889060	Poales	Poaceae	Triticinae	Triticum	Triticum aestivum
1330	MZ230675	Poales	Poaceae	Triticinae	Triticum	Triticum aestivum subsp. sphaerococcum
1404	LC625866	Poales	Poaceae	Triticinae	Triticum	Triticum spelta
1406	LC623766	Poales	Poaceae	Triticinae	Triticum	Triticum compactum
1405	LC625865	Poales	Poaceae	Triticum	Triticum aestivum	Triticum aestivum var. vavilovii
1517	KX631429	Poales	Poaceae	Triticum	Triticum aestivum	Triticum aestivum subsp. tibeticum
1512	LC376795	Poales	Poaceae	Triticum	Triticum carthlicum	Triticum carthlicum var. rubiginosum
1514	LC375535	Poales	Poaceae	Triticum	Triticum carthlicum	Triticum carthlicum var. fuliginosum
1513	LC375536	Poales	Poaceae	Triticum	Triticum macha	Triticum macha var. colchicum
1515	LC372826	Poales	Poaceae	Triticum	Triticum macha	Triticum macha var. megrelicum
147	NC_085288	Poales	Poaceae	Triticum	Triticum monococcum	Triticum monococcum subsp. sinskajae
153	PP067985	Poales	Poaceae	Triticum	Triticum monococcum	Triticum monococcum subsp. aegilopoides
1539	LC005977	Poales	Poaceae	Triticum	Triticum monococcum	Triticum monococcum subsp. monococcum
1300	LC655300	Poales	Poaceae	Triticum	Triticum timopheevii	Triticum timopheevii subsp. araraticum
1331	MZ230674	Poales	Poaceae	Triticum	Triticum turgidum	Triticum turgidum subsp. durum
1457	MK253668	Poales	Poaceae	Triticum	Triticum turgidum	Triticum turgidum subsp. paleocolchicum
125	OQ440002	Poales	Poaceae	Anatherum	unclassified Anatherum	Anatherum sp. KP-2024e
126	OQ440000	Poales	Poaceae	Anatherum	unclassified Anatherum	Anatherum sp. KP-2024d
127	OQ439999	Poales	Poaceae	Anatherum	unclassified Anatherum	Anatherum sp. KP-2024c
128	OQ439998	Poales	Poaceae	Anatherum	unclassified Anatherum	Anatherum sp. KP-2024b
129	OQ439993	Poales	Poaceae	Anatherum	unclassified Anatherum	Anatherum sp. KP-2024a
1403	MW194081	Poales	Poaceae	Cleistogenes	unclassified Cleistogenes	Cleistogenes sp. XJQ-2021
1453	MK622398	Poales	Poaceae	Cleistogenes	unclassified Cleistogenes	Cleistogenes sp. BM-2019
1251	OP207890	Poales	Poaceae	Dendrocalamus	unclassified Dendrocalamus	Dendrocalamus sp.
1456	MH036278	Poales	Poaceae	Eriachne	unclassified Eriachne	Eriachne sp. Teisher 58
1451	MH988722	Poales	Poaceae	Fargesia	unclassified Fargesia	Fargesia sp. YYZ-2019
1525	KY707768	Poales	Poaceae	Heteropogon	unclassified Heteropogon (in: monocots)	Heteropogon sp. AL04
1418	MK679796	Poales	Poaceae	Melocalamus	unclassified Melocalamus	Melocalamus sp. 1 JXL-2020
1532	KT373815	Poales	Poaceae	Merostachys	unclassified Merostachys	Merostachys sp. Greco 18
162	OQ791228	Poales	Poaceae	Neomicrocalamus	unclassified Neomicrocalamus	Neomicrocalamus sp. CYZ-2023a
1255	ON101253	Poales	Poaceae	Oryza	unclassified Oryza	Oryza sp.
667	NC_060289	Poales	Poaceae	Poaceae	unclassified Poaceae	Tripsacinae sp. MTP
100	PP454221	Poales	Poaceae	Saccharum officinarum species complex	unclassified Saccharum officinarum complex	Saccharum hybrid cultivar
163	OQ791226	Poales	Poaceae	Temochloa	unclassified Temochloa	Temochloa sp. CYZ-2023b
165	OQ791223	Poales	Poaceae	Temochloa	unclassified Temochloa	Temochloa sp. CYZ-2023a
1531	KU291484	Poales	Poaceae	Themeda	unclassified Themeda	Themeda sp. Saarela 1833
1269	ON422331	Poales	Poaceae	x Triticosecale	unclassified x Triticosecale	x Triticosecale sp.
10	OR750782	Poales	Poaceae	Yushania	unclassified Yushania	Yushania shuichengensis (nom. ined.)
11	OR750780	Poales	Poaceae	Yushania	unclassified Yushania	Yushania sp.
983	NC_036709	Poales	Poaceae	Uniolinae	Uniola	Uniola paniculata
1373	MT610069	Poales	Poaceae	Rhytachninae	Urelytrum	Urelytrum digitatum
1389	MT610050	Poales	Poaceae	Rhytachninae	Urelytrum	Urelytrum agropyroides
1129	NC_030617	Poales	Poaceae	Melinidinae	Urochloa	Urochloa reptans
1156	NC_030069	Poales	Poaceae	Melinidinae	Urochloa	Urochloa humidicola
1157	NC_030068	Poales	Poaceae	Melinidinae	Urochloa	Urochloa ruziziensis
1158	NC_030067	Poales	Poaceae	Melinidinae	Urochloa	Urochloa brizantha
1159	NC_030066	Poales	Poaceae	Melinidinae	Urochloa	Urochloa decumbens
910	NC_042238	Poales	Poaceae	Zoysiinae	Urochondra	Urochondra setulosa
982	NC_036710	Poales	Poaceae	Gouiniinae	Vaseyochloa	Vaseyochloa multinervosa
1349	MT610099	Poales	Poaceae	Rhytachninae	Vossia	Vossia cuspidata
1128	NC_030618	Poales	Poaceae	Cenchrinae	Whiteochloa	Whiteochloa capillipes
8	OR750784	Poales	Poaceae	Arundinariinae	Yushania	Yushania maculata
9	OR750783	Poales	Poaceae	Arundinariinae	Yushania	Yushania polytricha
475	NC_062890	Poales	Poaceae	Arundinariinae	Yushania	Yushania niitakayamensis
857	NC_043947	Poales	Poaceae	Arundinariinae	Yushania	Yushania glandulosa
858	NC_043946	Poales	Poaceae	Arundinariinae	Yushania	Yushania violascens
874	NC_043894	Poales	Poaceae	Arundinariinae	Yushania	Yushania brevipaniculata
875	NC_043893	Poales	Poaceae	Arundinariinae	Yushania	Yushania confusa
1196	NC_024725	Poales	Poaceae	Arundinariinae	Yushania	Yushania levigata
1244	NC_001666	Poales	Poaceae	Tripsacinae	Zea	Zea mays
1355	MT610091	Poales	Poaceae	Tripsacinae	Zea	Zea diploperennis
1528	KU291447	Poales	Poaceae	Tripsacinae	Zea	Zea nicaraguensis
347	BK061471	Poales	Poaceae	Zea	Zea mays	Zea mays subsp. parviglumis
348	BK061462	Poales	Poaceae	Zea	Zea mays	Zea mays subsp. mexicana
351	CM059589	Poales	Poaceae	Zea	Zea mays	Zea mays subsp. mays
1139	NC_030500	Poales	Poaceae	Zeugiteae	Zeugites	Zeugites pittieri
958	NC_037170	Poales	Poaceae	Coleanthinae	Zingeria	Zingeria biebersteiniana
395	OQ790120	Poales	Poaceae	Zizaniinae	Zizania	Zizania latifolia
481	NC_066144	Poales	Poaceae	Zizaniinae	Zizania	Zizania palustris
753	NC_053873	Poales	Poaceae	Zoysiinae	Zoysia	Zoysia matrella
913	NC_042188	Poales	Poaceae	Zoysiinae	Zoysia	Zoysia tenuifolia
1342	MZ233426	Poales	Poaceae	Zoysiinae	Zoysia	Zoysia macrostachya
1399	MW690657	Poales	Poaceae	Zoysiinae	Zoysia	Zoysia japonica
619	NC_061313	Poales	Rapateaceae	Rapateaceae	Rapatea	Rapatea paludosa
633	NC_061299	Poales	Restionaceae	Restionaceae	Anarthria	Anarthria humilis
631	NC_061301	Poales	Restionaceae	Restionaceae	Centrolepis	Centrolepis aristata
609	NC_061337	Poales	Restionaceae	Restionaceae	Dapsilanthus	Dapsilanthus disjunctus
617	NC_061315	Poales	Typhaceae	Typhaceae	Rohrbachia	Rohrbachia minima
594	NC_061352	Poales	Typhaceae	Typhaceae	Sparganium	Sparganium subglobosum
595	NC_061351	Poales	Typhaceae	Typhaceae	Sparganium	Sparganium confertum
639	NC_061203	Poales	Typhaceae	Typhaceae	Sparganium	Sparganium gramineum
640	NC_061202	Poales	Typhaceae	Typhaceae	Sparganium	Sparganium fluctuans
643	NC_061199	Poales	Typhaceae	Typhaceae	Sparganium	Sparganium hyperboreum
644	NC_061198	Poales	Typhaceae	Typhaceae	Sparganium	Sparganium erectum
645	NC_061197	Poales	Typhaceae	Typhaceae	Sparganium	Sparganium emersum
720	NC_058795	Poales	Typhaceae	Typhaceae	Sparganium	Sparganium angustifolium
721	NC_058794	Poales	Typhaceae	Typhaceae	Sparganium	Sparganium glomeratum
734	NC_058577	Poales	Typhaceae	Typhaceae	Sparganium	Sparganium natans
735	NC_058576	Poales	Typhaceae	Typhaceae	Sparganium	Sparganium eurycarpum
834	NC_044634	Poales	Typhaceae	Typhaceae	Sparganium	Sparganium stoloniferum
1279	MW874418	Poales	Typhaceae	Typhaceae	Sparganium	Sparganium fallax
1302	MW829767	Poales	Typhaceae	Typhaceae	Sparganium	Sparganium acaule
1304	MW829762	Poales	Typhaceae	Typhaceae	Sparganium	Sparganium japonicum
641	NC_061201	Poales	Typhaceae	Sparganium	Sparganium erectum	Sparganium erectum subsp. neglectum
642	NC_061200	Poales	Typhaceae	Sparganium	Sparganium erectum	Sparganium erectum subsp. microcarpum
1303	MW829765	Poales	Typhaceae	Sparganium	Sparganium stoloniferum	Sparganium stoloniferum subsp. choui
592	NC_061354	Poales	Typhaceae	Typhaceae	Typha	Typha przewalskii
593	NC_061353	Poales	Typhaceae	Typhaceae	Typha	Typha lugdunensis
799	NC_050678	Poales	Typhaceae	Typhaceae	Typha	Typha orientalis
1234	NC_013823	Poales	Typhaceae	Typhaceae	Typha	Typha latifolia
591	NC_061355	Poales	Typhaceae	Typha	unclassified Typha	Typha sp. 11CS3675
589	NC_061357	Poales	Xyridaceae	Xyridaceae	Xyris	Xyris pauciflora
590	NC_061356	Poales	Xyridaceae	Xyridaceae	Xyris	Xyris indica
615	NC_061317	Poales	Xyridaceae	Xyridaceae	Xyris	Xyris capensis
Uniqe Species
Achnatherum inebrians
Achnatherum pekinense
Achnatherum splendens
Acidosasa purpurea
Aechmea fasciata
Aegilops cylindrica
Aegilops geniculata
Aegilops kotschyi
Aegilops longissima
Aegilops sharonensis
Aegilops speltoides
Aegilops tauschii
Aeluropus littoralis
Aeluropus sinensis
Agenium leptocladum
Agropyron cristatum
Agropyron desertorum
Agrostis capillaris
Agrostis stolonifera
Alcantarea odorata
Alloeochaete uluguruensis
Alloteropsis angusta
Alloteropsis cimicina
Alloteropsis paniculata
Alloteropsis semialata
Alopecurus aequalis
Alopecurus japonicus
Ampelocalamus actinotrichus
Ampelocalamus mianningensis
Ampelocalamus microphyllus
Ampelocalamus naibunensis
Ampelocalamus scandens
Ampelocalamus sinovietnamensis
Amphicarpum muhlenbergianum
Amphipogon caricinus
Ananas comosus
Anarthria humilis
Anatherum arenarium
Anatherum glomeratum
Anatherum sp.
Anatherum trichozygum
Anatherum virginicum
Andropogon ascinodis
Andropogon festuciformis
Andropogon ivorensis
Andropogon leprodes
Andropogon mannii
Andropogon pringlei
Anomochloa marantoidea
Anthosachne rectiseta
Aristida adscensionis
Aristida behriana
Aristida congesta
Aristida diffusa
Aristida glaziovii
Aristida rufescens
Arthraxon hispidus
Arthraxon lanceolatus
Arthraxon prionodes
Arundinaria appalachiana
Arundinaria fargesii
Arundinaria gigantea
Arundinaria humbertii
Arundinaria tecta
Arundo donax
Arundo formosana
Arundo plinii
Astrebla lappacea
Australopyrum retrofractum
Avena agadiriana
Avena atlantica
Avena chinensis
Avena hirtula
Avena insularis
Avena longiglumis
Avena lusitanica
Avena murphyi
Avena nuda
Avena occidentalis
Avena sativa
Avena sterilis
Avena strigosa
Axonopus compressus
Axonopus ramosus
Bakerantha tillandsioides
Bambusa albolineata
Bambusa basihirsuta
Bambusa beecheyana
Bambusa emeiensis
Bambusa grandis
Bambusa multiplex
Bambusa odashimae
Bambusa oldhamii
Bambusa ooh
Bambusa pervariabilis
Bambusa rigida
Bambusa sinospinosa
Bambusa stenoaurita
Bambusa stenostachya
Bambusa textilis
Bambusa tuldoides
Bambusa utilis
Bambusa variostriata
Bambusa vulgaris
Bambusa x
Beckmannia syzigachne
Bolboschoenus planiculmis
Bonia levigata
Bonia saxatilis
Bothriochloa bladhii
Bothriochloa decipiens
Bothriochloa ischaemum
Bouteloua dactyloides
Brachiaria fragrans
Brachypodium distachyon
Brachypodium hybridum
Brachypodium stacei
Brachypodium sylvaticum
Brocchinia acuminata
Brocchinia micrantha
Brocchinia reducta
Bromus catharticus
Bromus diandrus
Bromus inermis
Calamagrostis epigeios
Campeiostachys calcicola
Campeiostachys dahurica
Campeiostachys nutans
Campeiostachys purpuraristata
Carex agglomerata
Carex breviculmis
Carex giraldiana
Carex laevissima
Carex lithophila
Carex littledalei
Carex microglochin
Carex myosuroides
Carex neurocarpa
Carex sargentiana
Carex siderosticta
Carex tibetikobresia
Catopsis nutans
Catopsis paniculata
Cenchrus alopecuroides
Cenchrus americanus
Cenchrus centrasiaticus
Cenchrus ciliaris
Cenchrus flaccidus
Cenchrus glaucus
Cenchrus longisetus
Cenchrus longispinus
Cenchrus longissimus
Cenchrus purpurascens
Cenchrus purpureus
Chasechloa egregia
Chasechloa madagascariensis
Chikusichloa aquatica
Chikusichloa mutica
Chimonobambusa hejiangensis
Chimonobambusa hirtinoda
Chimonobambusa luzhiensis
Chimonobambusa purpurea
Chimonobambusa quadrangularis
Chimonobambusa sangzhiensis
Chimonobambusa sichuanensis
Chloris truncata
Chloris virgata
Chrysopogon aciculatus
Chrysopogon serrulatus
Chrysopogon zizanioides
Chusquea culeou
Cleistogenes hancei
Cleistogenes sp.
Cleistogenes squarrosa
Coelachne africana
Coix lacryma-jobi
Coleanthus subtilis
Connorochloa tenuis
Crithopsis delileana
Ctenium brachystachyum
Ctenium cirrhosum
Ctenium concinnum
Ctenium longiglume
Ctenium newtonii
Cymbopogon citratus
Cymbopogon flexuosus
Cymbopogon winterianus
Cynodon dactylon
Cyperus amuricus
Cyperus aromaticus
Cyperus brevifolius
Cyperus esculentus
Cyperus exaltatus
Cyperus iria
Cyperus malaccensis
Cyperus michelianus
Cyperus microiria
Cyperus papyrus
Cyperus rotundus
Cyperus stolonifer
Dactyloctenium radulans
Dendrocalamus barbatus
Dendrocalamus farinosus
Dendrocalamus latiflorus
Dendrocalamus liboensis
Dendrocalamus ovatus
Dendrocalamus sinicus
Dendrocalamus sp.
Deschampsia cespitosa
Deschampsia nubigena
Desmostachya bipinnata
Dichanthelium ravenelii
Dichanthium annulatum
Dichanthium aristatum
Dichanthium sericeum
Digitaria sanguinalis
Diheteropogon filifolius
Diheteropogon grandiflorus
Dinebra chinensis
Douglasdeweya deweyi
Dregeochloa pumila
Drepanostachyum semiorbiculatum
Echinochloa colona
Echinochloa crus-galli
Echinochloa esculenta
Echinochloa frumentacea
Echinochloa haploclada
Echinochloa oryzicola
Echinochloa stagnina
Ehrharta bulbosa
Ehrharta erecta
Eleocharis cellulosa
Eleusine coracana
Eleusine indica
Elymus atratus
Elymus dahuricus
Elymus grandis
Elymus hystrix
Elymus kamoji
Elymus libanoticus
Elymus magellanicus
Elymus pendulinus
Elymus repens
Elymus sibiricus
Elymus tauri
Elymus trachycaulus
Elymus virginicus
Entolasia imbricata
Eragrostis brownii
Eragrostis japonica
Eragrostis pilosa
Eragrostis rufinerva
Eragrostis setifolia
Eragrostis tef
Eragrostis unioloides
Eremochloa ciliaris
Eremochloa ophiuroides
Eremopogon tuberculatus
Eriachne aristidea
Eriachne armittii
Eriachne avenacea
Eriachne glauca
Eriachne mucronata
Eriachne obtusa
Eriachne pallescens
Eriachne pauciflora
Eriachne stipacea
Eriachne sulcata
Eriachne triodioides
Eriachne triseta
Eriocaulon australe
Eriocaulon buergerianum
Eriocaulon decemflorum
Eriocaulon fistulosum
Eriocaulon henryanum
Eriocaulon miquelianum
Eriocaulon nepalense
Eriocaulon oryzetorum
Eriocaulon schochianum
Eriocaulon sp.
Eriocaulon tonkinense
Eriochloa meyeriana
Eriochrysis laxa
Eriochrysis pallida
Eulalia aurea
Eulalia siamensis
Eulaliopsis binata
Fargesia albocerea
Fargesia angustissima
Fargesia decurvata
Fargesia denudata
Fargesia dracocephala
Fargesia qinlingensis
Fargesia setosa
Festuca pratensis
Festuca rubra
Flagellaria indica
Froesiochloa boutelouoides
Gaoligongshania megalothyrsa
Garnotia tenella
Gelidocalamus kunishii
Gelidocalamus multifolius
Gelidocalamus tessellatus
Gelidocalamus xunwuensis
Gelidocalamus zixingensis
Gigantochloa glabrata
Gigantochloa nigrociliata
Gigantochloa parviflora
Gigantochloa verticillata
Guadua angustifolia
Guadua chacoensis
Gynerium sagittatum
Harpachne harpachnoides
Hechtia confusa
Hechtia myriantha
Hechtia rosea
Heteropogon contortus
Heteropogon melanocarpus
Heteropogon triticeus
Hitchcockella baronii
Holcus lanatus
Homozeugos eylesii
Hordeum bogdanii
Hordeum brevisubulatum
Hordeum jubatum
Hordeum marinum
Hordeum pusillum
Hordeum vulgare
Hygroryza aristata
Hyparrhenia anamesa
Hyparrhenia anemopaegma
Hyparrhenia bracteata
Hyparrhenia dichroa
Hyparrhenia figariana
Hyparrhenia finitima
Hyparrhenia multiplex
Hyparrhenia newtonii
Hyparrhenia papillipes
Hyparrhenia pilgeriana
Hyparrhenia rufa
Hyparrhenia schimperi
Hyparrhenia subplumosa
Hyparrhenia variabilis
Hypolytrum nemorum
Imperata cylindrica
Indocalamus emeiensis
Indocalamus hirtivaginatus
Indocalamus tongchunensis
Indosasa crassiflora
Indosasa gigantea
Indosasa hispida
Indosasa lipoensis
Indosasa longispicata
Indosasa sinica
Iseilema hubbardii
Isolepis setacea
Jardinea congoensis
Joinvillea ascendens
Juncus alatus
Juncus effusus
Juncus gracilicaulis
Juncus roemerianus
Juncus validus
Kampochloa brachyphylla
Kengyilia alatavica
Kengyilia grandiglumis
Kengyilia hirsuta
Kerriochloa siamensis
Koeleria macrantha
Lamarckia aurea
Lecomtella madagascariensis
Leersia japonica
Leersia perrieri
Leptagrostis schimperiana
Leptaspis zeylanica
Leptochloa pluriflora
Lepturus repens
Leymus arenarius
Leymus chinensis
Leymus cinereus
Leymus mollis
Leymus multicaulis
Leymus racemosus
Leymus ramosus
Leymus secalinus
Leymus triticoides
Littledalea alaica
Littledalea przevalskyi
Littledalea racemosa
Littledalea tibetica
Lolium arundinaceum
Lolium perenne
Loudetiopsis kerstingii
Loxodera bovonei
Macrochloa tenacissima
Megathyrsus maximus
Melica scabrosa
Melinis minutiflora
Merostachys sp.
Miscanthus floridulus
Miscanthus sacchariflorus
Miscanthus sinensis
Miscanthus x
Molinia caerulea
Muhlenbergia ramosa
Nassella hyalina
Nassella trichotoma
Navia igneosicola
Neomicrocalamus prainii
Neomicrocalamus sp.
Neoregelia sp.
Neyraudia reynaudiana
Oligostachyum sulcatum
Orinus intermedius
Orinus kokonoricus
Orinus thoroldii
Oropetium aristatum
Oryza alta
Oryza australiensis
Oryza barthii
Oryza brachyantha
Oryza coarctata
Oryza eichingeri
Oryza glaberrima
Oryza glumipatula
Oryza grandiglumis
Oryza latifolia
Oryza longiglumis
Oryza longistaminata
Oryza malampuzhaensis
Oryza meridionalis
Oryza meyeriana
Oryza minuta
Oryza nivara
Oryza officinalis
Oryza punctata
Oryza rhizomatis
Oryza ridleyi
Oryza rufipogon
Oryza sativa
Oryza schlechteri
Oryza sp.
Paepalanthus alpinus
Panicum incomtum
Panicum miliaceum
Panicum sumatrense
Panicum virgatum
Paspalum floridanum
Paspalum glaziovii
Paspalum inaequivalve
Paspalum ionanthum
Paspalum juergensii
Paspalum simplex
Paspalum vaginatum
Paspalum virgatum
Pennisetum giganteum
Phaenosperma globosum
Pharus lappulaceus
[truncated: 251 more rows]

## Sheet: Table S3
Species	Source	Accession
Achnatherum pekinense	NCBI	NC_058870
Acidosasa purpurea	NCBI	NC_015820
Acrachne racemosa	NCBI	NC_068107
Aechmea fasciata	NCBI	NC_087761
Aegilops comosa	NCBI	NC_046697
Aegilops speltoides var. aucheri	NCBI	OR936055
Aeluropus littoralis	NCBI	ON357749
Agenium villosum	NCBI	NC_059820
Agropyron cristatum	NCBI	MN703672
Agrostis stolonifera	NCBI	OQ695464
Alcantarea nahoumii	NCBI	NC_081513
Alloeochaete uluguruensis	NCBI	NC_035519
Alloteropsis paniculata	NCBI	NC_032078
Alopecurus pratensis	NCBI	NC_067048
Amphipogon turbinatus	NCBI	NC_035521
Anadelphia scyphofera	NCBI	NC_087655
Ananas comosus var. erectifolius	NCBI	MZ457322
Anarthria humilis	NCBI	NC_061299
Anatherum eucomum subsp. huillense	NCBI	MH181180
Andropogon gayanus var. bisquamulatus	NCBI	OQ518181
Andropterum stolzii	NCBI	MT610072
Anomochloa marantoidea	NCBI	NC_014062
Apluda mutica	NCBI	MT610058
Aristida adscensionis	NCBI	NC_060728
Arthraxon lanceolatus	NCBI	NC_035017
Arundinella deppeana	NCBI	NC_030620
Astrebla lappacea	NCBI	NC_042839
Avena sativa	NCBI	MK336398
Axonopus compressus	NCBI	NC_046490
Bakerantha lundelliorum	NCBI	NC_085610
Bambusa beecheyana var. pubescens	NCBI	MW770448
Bambusa ooh	NCBI	OR069396
Barfussia wagneriana	NCBI	NC_081514
Beckmannia syzigachne	NCBI	MT653696
Bolboschoenus planiculmis	NCBI	NC_058998
Bothriochloa decipiens	NCBI	NC_040131
Bouteloua dactyloides	NCBI	NC_068108
Brachiaria fragrans	NCBI	NC_033879
Brachypodium sylvaticum	NCBI	NC_058601
Briza media	NCBI	NC_067043
Brocchinia tatei	NCBI	NC_085613
Bromus diandrus	NCBI	NC_082233
Carex giraldiana	NCBI	NC_081502
Catapodium rigidum	NCBI	NC_036711
Catopsis paniculata	NCBI	NC_081516
Cenchrus purpurascens	NCBI	NC_086744
Chasmanthium laxum	NCBI	NC_035522
Chasmanthium laxum subsp. sessiliflorum	NCBI	KU291494
Chikusichloa mutica	NCBI	NC_041081
Chionachne koenigii	NCBI	MT610087
Chrysopogon zizanioides	NCBI	NC_035034
Chusquea culeou	NCBI	NC_042672
Cleistogenes caespitosa var. ramosa	NCBI	MW194083
Cleistogenes squarrosa	NCBI	NC_060398
Coelachne africana	NCBI	NC_035732
Coix lacryma-jobi	NCBI	NC_013273
Coleanthus subtilis	NCBI	NC_062353
Crinipes longifolius	NCBI	NC_035524
Ctenium longiglume	NCBI	NC_088436
Cynosurus cristatus	NCBI	NC_036713
Cyperus malaccensis subsp. monophyllus	NCBI	OR438648
Cyperus microiria	NCBI	OR668912
Cyperus stolonifer	NCBI	NC_087701
Dactylis glomerata	NCBI	OM049559
Danthoniopsis dinteri	NCBI	NC_030502
Dendrocalamus barbatus var. internodiiradicatus	NCBI	MK679778
Deschampsia nubigena	NCBI	NC_080989
Desmostachya bipinnata	NCBI	NC_063471
Dichanthelium ravenelii	NCBI	NC_050403
Digitaria sanguinalis	NCBI	OK637269
Diheteropogon amplectens var. catangensis	NCBI	KU291497
Echinochloa crus-galli var. praticola	NCBI	KR822686
Ehrharta erecta	NCBI	NC_054197
Eleocharis cellulosa	NCBI	NC_047448
Elionurus muticus	NCBI	MT610077
Elymus dahuricus var. violeus	NCBI	MT644149
Elymus nodosus subsp. caespitosus	NCBI	MK775251
Enneapogon desvauxii	NCBI	NC_059726
Eragrostis nutans	NCBI	NC_086738
Eremochloa ophiuroides	NCBI	NC_036716
Eriachne sp. Teisher 58	NCBI	MH036278
Eriachne tenuiculmis	NCBI	NC_042831
Eriocaulon oryzetorum	NCBI	NC_066100
Eriocaulon sp. LE23	NCBI	NC_066101
Fargesia sp. YYZ-2019	NCBI	MH988722
Festuca pratensis	NCBI	OM049560
Festuca rubra subsp. fallax	NCBI	MN309826
Flagellaria indica	NCBI	NC_058648
Froesiochloa boutelouoides	NCBI	NC_039983
Gahnia tristis	NCBI	NC_061305
Garnotia stricta var. longiseta	NCBI	MK593551
Germainia capitata	NCBI	NC_035046
Glyceria arkansana	NCBI	NC_050406
Goudaea ospinae	NCBI	NC_065165
Guadua angustifolia	NCBI	NC_029749
Guaduella oblonga	NCBI	NC_061344
Gynerium sagittatum	NCBI	NC_036687
Hakonechloa macra	NCBI	MF035985
Heteropogon sp. AL04	NCBI	KY707768
Hitchcockella baronii	NCBI	NC_044487
Holcus lanatus	NCBI	NC_036689
Homolepis isocalycia	NCBI	NC_036690
Hordeum brevisubulatum subsp. violaceum	NCBI	MW266081
Hordeum vulgare var. distichon	NCBI	MW531731
Humbertochloa bambusiuscula	NCBI	NC_036691
Hyparrhenia confinis var. nudiglumis	NCBI	OQ518200
Hypolytrum nemorum	NCBI	NC_036036
Isolepis setacea	NCBI	NC_056187
Joinvillea ascendens	NCBI	NC_031427
Joinvillea sp. Yi14364	NCBI	NC_061346
Juncus effusus	NCBI	NC_059754
Kampochloa brachyphylla	NCBI	NC_085716
Lecomtella madagascariensis	NCBI	NC_024106
Leersia perrieri	NCBI	NC_044486
Leptagrostis schimperiana	NCBI	NC_058993
Leptaspis zeylanica	NCBI	NC_033864
Leymus racemosus subsp. sabulosus	NCBI	MW628904
Lindmania sp. AMF-2023a	NCBI	OQ308827
Littledalea alaica	NCBI	NC_037519
Loxodera bovonei	NCBI	MT610100
Lygeum spartum	NCBI	NC_036693
Melocalamus compactiflorus var. fimbriatus	NCBI	MK679793
Merostachys sp. Greco 18	NCBI	KT373815
Merxmuellera tsaratananensis	NCBI	NC_036122
Miscanthus sinensis subsp. sinensis	NCBI	LN869228
Miscanthus sinensis var. purpurascens	NCBI	LN869224
Miscanthus x giganteus	NCBI	NC_035753
Muhlenbergia ramosa	NCBI	NC_068119
Nardus stricta	NCBI	NC_036695
Navia igneosicola	NCBI	NC_085611
Neomicrocalamus sp. CYZ-2023a	NCBI	OQ791228
Neoregelia sp. WH1915	NCBI	NC_061349
Neurachne muelleri	NCBI	NC_039450
Neyraudia reynaudiana	NCBI	NC_024262
Oryza meyeriana var. granulata	NCBI	KF359920
Oryza sativa temperate japonica subgroup	NCBI	MW001303
Otachyrium versicolor	NCBI	NC_030492
Panicum incomtum	NCBI	NC_039619
Panicum pygmaeum	NCBI	NC_036120
Perotis rara	NCBI	NC_068123
Phaenosperma globosum	NCBI	OM201309
Phleum pratense	NCBI	NC_067044
Phragmites australis subsp. americanus	NCBI	NC_060780
Phyllostachys edulis f. gracilis	NCBI	PP453784
Pitcairnia atrorubens	NCBI	NC_085612
Poa supina	NCBI	NC_067045
Puelia olyriformis	NCBI	NC_023449
Puya raimondii	NCBI	OQ308826
Rapatea paludosa	NCBI	NC_061313
Reynaudia filiformis	NCBI	MK593560
Rhipidocladum pittieri	NCBI	NC_036700
Rohrbachia minima	NCBI	NC_061315
Saccharum hybrid cultivar	NCBI	PP454221
Saccharum hybrid cultivar NCo 310	NCBI	NC_006084
Saccharum spontaneum	NCBI	PP454216
Sacciolepis indica	NCBI	NC_036702
Sarga versicolor	NCBI	MT942630
Schizachyrium sanguineum var. hirtiflorum	NCBI	OQ518163
Schizostachyum auriculatum	NCBI	NC_068071
Scleria parvula	NCBI	NC_061314
Secale cereale subsp. vavilovii	NCBI	OQ700975
Sinobambusa tootsik f. albostriata	NCBI	OQ160796
Sinobambusa tootsik var. laeta	NCBI	OQ236108
Sorghum bicolor subsp. drummondii	NCBI	OR353656
Sparganium erectum subsp. neglectum	NCBI	NC_061201
Sporobolus virginicus	NCBI	NC_068126
Stipa caucasica subsp. glareosa	NCBI	OP681434
Stipagrostis uniplumis var. uniplumis	NCBI	MF460973
Streptochaeta spicata	NCBI	NC_033862
Streptogyna americana	NCBI	NC_036683
Taeniatherum caput-medusae subsp. caput-medusae	NCBI	MH285856
Temochloa liliana	NCBI	NC_085342
Temochloa sp. CYZ-2023b	NCBI	OQ791226
Themeda sp. Saarela 1833	NCBI	KU291484
Tillandsia elongata var. subimbricata	NCBI	OQ935633
Tragus mongolorum	NCBI	NC_068128
Trichoneura weberbaueri	NCBI	NC_082219
Trikeraia hookeri var. hookeri	NCBI	MW699773
Triodia lanigera	NCBI	NC_042872
Tripsacinae sp. MTP	NCBI	NC_060289
Tripsacum dactyloides var. floridanum	NCBI	MT610084
Triticum aestivum var. vavilovii	NCBI	LC625865
Typha sp. 11CS3675	NCBI	NC_061355
Uniola paniculata	NCBI	NC_036709
Urochondra setulosa	NCBI	NC_042238
Vaseyochloa multinervosa	NCBI	NC_036710
Vriesea hybrid cultivar	NCBI	NC_061316
Xyris pauciflora	NCBI	NC_061357
Yushania shuichengensis (nom. ined.)	NCBI	OR750782
Zea mays subsp. parviglumis	NCBI	BK061471
Zeugites pittieri	NCBI	NC_030500
x Triticosecale sp.	NCBI	ON422331

## Sheet: Table S4
Category	Count	Examples
Coding sequences (CDS)	78	-
tRNAs	0	-
rRNAs	3	-
Photosystem I	5	psaA, psaB, psaJ, pafI, pafII
Photosystem II	13	psbA, psbB, psbC, psbD, psbE, psbF, psbH, psbI, psbJ, psbK, psbL, psbT, psbZ
Cytochrome b6f complex	5	petA, petB, petD, petG, petL
ATP synthase	6	atpA, atpB, atpE, atpF, atpH, atpI
Plastid-encoded RNA polymerase	4	rpoA, rpoB, rpoC1, rpoC2
Ribosomal proteins	29	rpl2, rpl14, rpl16, rpl20, rpl22, rpl23, rpl33, rpl36, rps genes
Hallmark plastid genes	1	rbcL

## Sheet: Table S5
atpA
atpB
atpE
atpF
atpH
atpI
cemA
clpP
infA
matK
ndhA
ndhB
ndhC
ndhG
ndhH
ndhI
ndhJ
ndhK
petA
petB
petD
petG
petL
petN
psaA
psaB
psaC
psaI
psaJ
psbA
psbB
psbC
psbD
psbE
psbF
psbH
psbI
psbJ
psbK
psbL
psbM
psbN
psbT
psbZ
rbcL
rpl14
rpl16
rpl2
rpl20
rpl22
rpl23
rpl32
rpl33
rpl36
rpoA
rpoB
rpoC1
rpoC2
rps11
rps12
rps14
rps15
rps18
rps19
rps2
rps3
rps4
rps7
rps8
rrn16
rrn23
rrn4.5
rrn5
trnA-UGC
trnC-GCA
trnD-GUC
trnE-UUC
trnF-GAA
trnG-GCC
trnG-UCC
trnH-GUG
trnI-CAU
trnI-GAU
trnK-UUU
trnL-CAA
trnL-UAA
trnL-UAG
trnM-CAU
trnN-GUU
trnP-GGG
trnP-UGG
trnQ-UUG
trnR-ACG
trnR-CCG
trnR-UCG
trnR-UCU
trnS-CGA
trnS-GCU
trnS-GGA
trnS-UGA
trnT-GGU
trnT-UGU
trnV-GAC
trnV-UAC
trnW-CCA
trnY-GUA
trnfM-CAU
ycf12
ycf3
ycf4
ycf68

## Sheet: Table S6
Elymus
Iteration	Number of nodes	Number of unique nodes	Number of shared nodes	Number of core nodes	Number of edges	Average degree	Graph density
1	4761	1403	1709	1649	6552	1.38	0.000578228
2	1539	402	605	532	2121	1.38	0.00179216
3	1810	512	706	592	2551	1.41	0.0015582
4	1431	271	665	495	1971	1.38	0.00192638
5	1597	458	621	518	2262	1.42	0.00177494
6	4555	1284	1687	1584	6233	1.37	0.00060096
7	4442	1242	1664	1536	6084	1.37	0.000616822
8	1613	427	642	544	2262	1.40	0.0017399
9	1644	424	680	540	2308	1.40	0.00170894
10	1382	329	571	482	1907	1.38	0.00199838
11	4674	1406	1660	1608	6459	1.38	0.00059144
12	1767	457	732	578	2475	1.40	0.00158627
13	4457	1311	1622	1524	6141	1.38	0.000618417
14	1515	346	667	502	2092	1.38	0.00182412
15	1608	347	708	553	2223	1.38	0.00172055
16	4199	1132	1642	1425	5744	1.37	0.000651713
17	4488	1267	1701	1520	6143	1.37	0.000610101
18	4509	1268	1659	1582	6172	1.37	0.000607284
19	4703	1314	1824	1565	6443	1.37	0.000582721
20	4709	1396	1772	1541	6508	1.38	0.0005871
21	4508	1220	1733	1555	6177	1.37	0.000608046
22	1557	313	708	536	2151	1.38	0.00177571
23	4722	1392	1722	1608	6528	1.38	0.000585666
24	4421	1263	1641	1517	6046	1.37	0.000618807
25	1727	482	682	563	2443	1.41	0.00163916
26	1566	340	684	542	2168	1.38	0.00176923
27	4409	1261	1629	1519	6073	1.38	0.000624959
28	4611	1335	1759	1517	6316	1.37	0.000594259
29	1666	428	677	561	2340	1.40	0.00168716
30	4475	1297	1666	1512	6129	1.37	0.000612253
Triticum
Iteration	Number of nodes	Number of unique nodes	Number of shared nodes	Number of core nodes	Number of edges	Average degree	Graph density
1	1877	235	1024	618	2621	1.40	0.00148868
2	1722	149	949	624	2354	1.37	0.00158863
3	1565	126	866	573	2164	1.38	0.00176822
4	1880	151	1110	619	2609	1.39	0.00147713
5	1562	142	857	563	2174	1.39	0.00178322
6	2280	303	1123	854	3132	1.37	0.00120551
7	2013	241	1078	694	2778	1.38	0.0013718
8	2000	227	1081	692	2765	1.38	0.00138319
9	1615	141	897	577	2231	1.38	0.0017118
10	1643	417	699	527	2282	1.39	0.00169175
11	2297	198	1126	973	3184	1.39	0.00120745
12	1873	204	1000	669	2562	1.37	0.00146139
13	2272	295	1215	762	3130	1.38	0.00121325
14	1690	173	908	609	2344	1.39	0.00164237
15	1997	236	1040	721	2737	1.37	0.0013733
16	1698	162	918	618	2360	1.39	0.00163803
17	1814	270	933	611	2516	1.39	0.00153005
18	1892	239	1029	624	2642	1.40	0.0014769
19	1549	115	876	558	2156	1.39	0.00179828
20	2321	423	1119	779	3215	1.39	0.00119412
21	2126	625	747	754	2928	1.38	0.00129622
22	1899	153	1076	670	2647	1.39	0.0014688
23	2507	357	1215	935	3456	1.38	0.00110019
24	1818	200	960	658	2530	1.39	0.0015318
25	1817	522	628	667	2486	1.37	0.00150682
26	1598	150	876	572	2207	1.38	0.00172962
27	1872	150	1059	663	2608	1.39	0.00148922
28	1817	187	1031	599	2535	1.40	0.00153652
29	1935	549	687	699	2656	1.37	0.00141945
30	1569	126	879	564	2182	1.39	0.00177385
Phyllostachys
Iteration	Number of nodes	Number of unique nodes	Number of shared nodes	Number of core nodes	Number of edges	Average degree	Graph density
1	302	59	130	113	424	1.40	0.00932873
2	324	62	145	117	456	1.41	0.0087146
3	491	79	232	180	687	1.40	0.00571096
4	315	31	171	113	441	1.40	0.0089172
5	323	49	153	121	453	1.40	0.00871104
6	492	108	203	181	687	1.40	0.00568775
7	163	1	97	65	225	1.38	0.0170416
8	274	49	122	103	383	1.40	0.0102404
9	366	34	199	133	517	1.41	0.0077401
10	443	105	177	161	619	1.40	0.00632258
11	220	19	119	82	308	1.40	0.0127854
12	416	54	200	162	588	1.41	0.00681186
13	323	24	180	119	457	1.41	0.00878795
14	358	30	191	137	507	1.42	0.0079339
15	312	44	149	119	438	1.40	0.00902795
16	284	4	176	104	399	1.40	0.00992883
17	272	20	154	98	380	1.40	0.0103104
18	277	18	155	104	390	1.41	0.0102025
19	448	61	221	166	632	1.41	0.00631192
20	240	30	122	88	335	1.40	0.0116806
21	332	52	161	119	468	1.41	0.00851745
22	473	87	212	174	664	1.40	0.00594833
23	468	111	186	171	652	1.39	0.00596643
24	423	78	191	154	592	1.40	0.00663283
25	371	79	157	135	521	1.40	0.00759088
26	326	62	146	118	456	1.40	0.00860783
27	277	43	130	104	387	1.40	0.010124
28	367	57	178	132	518	1.41	0.00771281
29	314	49	150	115	440	1.40	0.00895383
30	429	83	185	161	603	1.41	0.0065682
Dendrocalamus
Iteration	Number of nodes	Number of unique nodes	Number of shared nodes	Number of core nodes	Number of edges	Average degree	Graph density
1	1011	266	402	343	1396	1.38	0.00273428
2	6172	1819	2249	2104	8412	1.36	0.000441721
3	860	224	342	294	1190	1.38	0.0032217
4	788	199	323	266	1092	1.39	0.00352169
5	865	158	411	296	1198	1.38	0.00320595
6	590	128	258	204	814	1.38	0.00468476
7	5690	1719	2046	1925	7736	1.36	0.000477967
8	5901	1753	2124	2024	8034	1.36	0.000461513
9	5696	1741	2026	1929	7737	1.36	0.000477023
10	1546	393	603	550	2133	1.38	0.00178601
11	1159	294	474	391	1596	1.38	0.00237832
12	5411	1711	1848	1852	7338	1.36	0.000501341
13	5854	1745	2126	1983	7960	1.36	0.000464635
14	1808	436	741	631	2503	1.38	0.00153227
15	5847	1792	2082	1973	7956	1.36	0.000465514
16	1290	338	517	435	1778	1.38	0.00213855
17	1756	471	671	614	2429	1.38	0.00157636
18	692	118	337	237	949	1.37	0.00396928
19	846	179	375	292	1170	1.38	0.00327332
20	5233	1638	1801	1794	7086	1.35	0.000517622
21	5423	1713	1853	1857	7359	1.36	0.000500553
22	5635	1711	2012	1912	7663	1.36	0.000482745
23	5716	1744	2047	1925	7769	1.36	0.000475649
24	5828	1799	2019	2010	7933	1.36	0.0004672
25	1987	445	849	693	2749	1.38	0.00139325
26	1235	334	482	419	1702	1.38	0.00223361
27	1572	399	620	553	2185	1.39	0.00176951
28	959	256	374	329	1329	1.39	0.00289315
29	5481	1700	1921	1860	7441	1.36	0.000495474
30	5230	1644	1796	1790	7087	1.36	0.000518289
Eriachne
Iteration	Number of nodes	Number of unique nodes	Number of shared nodes	Number of core nodes	Number of edges	Average degree	Graph density
1	7591	1413	3625	2553	10437	1.37	0.000362297
2	10196	2502	4292	3402	14029	1.38	0.000269923
3	9603	1627	4941	3035	13217	1.38	0.000286678
4	11706	2410	5448	3848	16103	1.38	0.000235048
5	9476	2151	4166	3159	13024	1.37	0.000290115
6	10212	1745	5274	3193	14051	1.38	0.0002695
7	8711	1772	4146	2793	11966	1.37	0.000315423
8	10765	1879	5326	3560	14849	1.38	0.000256295
9	11835	2203	6000	3632	16293	1.38	0.000232665
10	10904	2329	5156	3419	14998	1.38	0.000252308
11	10347	2272	4675	3400	14244	1.38	0.000266118
12	8578	1885	3941	2752	11772	1.37	0.000320006
13	10818	1913	5375	3530	14914	1.38	0.0002549
14	10646	1847	5469	3330	14654	1.38	0.000258615
15	12133	2948	5414	3771	16701	1.38	0.00022692
16	10434	2163	4971	3300	14348	1.38	0.00026361
17	7823	1323	3976	2524	10735	1.37	0.000350866
18	10981	1788	5757	3436	15116	1.38	0.000250739
19	11359	1912	5915	3532	15631	1.38	0.000242312
20	9948	1891	4735	3322	13666	1.37	0.000276213
21	10749	2416	4746	3587	14781	1.38	0.000255881
22	10501	2542	4671	3288	14461	1.38	0.000262306
23	11723	2403	5695	3625	16133	1.38	0.000234804
24	8513	2044	3775	2694	11677	1.37	0.00032229
25	13168	3451	5649	4068	18110	1.38	0.000208902
26	9187	1279	4846	3062	12629	1.37	0.000299295
27	9939	1409	5415	3115	13648	1.37	0.000276349
28	8812	1916	3938	2958	12145	1.38	0.000312844
29	10569	2135	5016	3418	14556	1.38	0.000260643
30	9654	1792	4820	3042	13280	1.38	0.000285009
Anatherum
Iteration	Number of nodes	Number of unique nodes	Number of shared nodes	Number of core nodes	Number of edges	Average degree	Graph density
1	1797	285	919	593	2507	1.40	0.00155357
2	3114	709	1387	1018	4346	1.40	0.000896648
3	3172	760	1365	1047	4430	1.40	0.000880855
4	3014	664	1349	1001	4212	1.40	0.000927633
5	1740	272	885	583	2429	1.40	0.00160549
6	2238	421	1030	787	3123	1.40	0.0012476
7	2154	392	1032	730	3004	1.39	0.00129551
8	1842	459	753	630	2572	1.40	0.0015169
9	1715	233	915	567	2396	1.40	0.0016302
10	2004	355	970	679	2807	1.40	0.0013986
11	2632	552	1168	912	3677	1.40	0.00106198
12	1700	266	861	573	2370	1.39	0.0016411
13	2750	636	1196	918	3832	1.39	0.00101379
14	2043	399	970	674	2854	1.40	0.00136823
15	1543	216	800	527	2151	1.39	0.00180809
16	2018	404	905	709	2809	1.39	0.00138024
17	1820	301	908	611	2535	1.39	0.00153145
18	2142	428	1004	710	2990	1.40	0.00130396
19	2007	367	988	652	2805	1.40	0.00139343
20	3051	697	1348	1006	4265	1.40	0.000916657
21	2965	650	1315	1000	4139	1.40	0.000941938
22	3574	865	1559	1150	5010	1.40	0.000784658
23	2087	384	1021	682	2922	1.40	0.00134237
24	2685	574	1219	892	3749	1.40	0.00104044
25	3077	716	1334	1027	4298	1.40	0.000908202
26	2496	519	1136	841	3478	1.39	0.00111698
27	2789	605	1253	931	3895	1.40	0.00100183
28	2436	596	989	851	3402	1.40	0.00114707
29	2498	526	1142	830	3488	1.40	0.0011184
30	2374	480	1104	790	3322	1.40	0.00117937
Avena
Iteration	Number of nodes	Number of unique nodes	Number of shared nodes	Number of core nodes	Number of edges	Average degree	Graph density
1	3617	995	1415	1207	4939	1.37	0.000755252
2	3600	1010	1369	1221	4919	1.37	0.000759316
3	1224	197	615	412	1706	1.39	0.0022793
4	1248	284	541	423	1729	1.39	0.002222
5	3244	883	1245	1116	4427	1.36	0.000841612
6	3773	416	2094	1263	5155	1.37	0.000724436
7	3332	915	1273	1144	4544	1.36	0.00081882
8	3655	434	1996	1225	4998	1.37	0.000748463
9	3855	381	2198	1276	5271	1.37	0.000709556
10	3499	965	1349	1185	4779	1.37	0.000780914
11	1122	244	490	388	1559	1.39	0.00247901
12	919	162	436	321	1278	1.39	0.00302972
13	3361	140	2067	1154	4591	1.37	0.000813073
14	4133	522	2250	1361	5661	1.37	0.000662975
15	1179	253	523	403	1637	1.39	0.00235733
16	3455	986	1296	1173	4724	1.37	0.000791716
17	3273	122	2026	1125	4463	1.36	0.000833485
18	3433	983	1282	1168	4680	1.36	0.000794428
19	887	154	423	310	1229	1.39	0.0031277
20	1152	245	510	397	1598	1.39	0.00241034
21	3637	354	2062	1221	4968	1.37	0.000751354
22	3718	384	2082	1252	5082	1.37	0.000735466
23	3816	417	2120	1279	5219	1.37	0.000716992
24	3408	957	1283	1168	4657	1.37	0.000802166
25	4018	551	2140	1327	5503	1.37	0.000681895
26	3386	975	1257	1154	4614	1.36	0.000805122
27	3379	972	1256	1151	4607	1.36	0.000807236
28	3270	936	1212	1122	4459	1.36	0.000834266
29	3147	885	1180	1082	4284	1.36	0.000865414
30	3834	1166	1385	1283	5251	1.37	0.00071463
Oryza
Iteration	Number of nodes	Number of unique nodes	Number of shared nodes	Number of core nodes	Number of edges	Average degree	Graph density
1	9000	2104	4168	2728	12333	1.37	0.000304552
2	6351	1506	2671	2174	8669	1.36	0.000429916
3	3427	514	1777	1136	4686	1.37	0.000798235
4	4402	801	2123	1478	6073	1.38	0.000626949
5	8538	1072	4668	2798	11687	1.37	0.00032068
6	5984	1310	2694	1980	8172	1.37	0.000456507
7	6861	1452	3259	2150	9395	1.37	0.000399223
8	5114	869	2616	1629	6992	1.37	0.000534804
9	11252	2155	5759	3338	15457	1.37	0.000244194
10	7111	1723	3007	2381	9715	1.37	0.000384302
11	9889	2061	4700	3128	13552	1.37	0.000277187
12	11102	1975	5784	3343	15238	1.37	0.000247283
13	9242	1064	5208	2970	12715	1.38	0.000297757
14	11854	2595	5744	3515	16290	1.37	0.000231877
15	11737	2078	6100	3559	16143	1.38	0.000234389
16	7666	755	4454	2457	10482	1.37	0.000356774
17	4079	709	2002	1368	5609	1.38	0.000674395
18	7732	1852	3300	2580	10603	1.37	0.000354757
19	7984	1653	3912	2419	10938	1.37	0.000343227
20	11975	2100	6293	3582	16463	1.37	0.000229628
21	8160	1594	3974	2592	11161	1.37	0.000335279
22	5292	230	3241	1821	7188	1.36	0.000513429
23	3827	649	1912	1266	5236	1.37	0.000715198
24	7861	1261	4101	2499	10762	1.37	0.000348355
25	10069	2089	4731	3249	13840	1.37	0.000273046
26	9875	2028	4858	2989	13554	1.37	0.000278014
27	8265	1797	3921	2547	11319	1.37	0.00033144
28	9014	1642	4565	2807	12382	1.37	0.000304813
29	9263	1079	5287	2897	12732	1.37	0.000296804
30	6773	574	4054	2145	9274	1.37	0.000404389
Stipa
Iteration	Number of nodes	Number of unique nodes	Number of shared nodes	Number of core nodes	Number of edges	Average degree	Graph density
1	2660	540	1181	939	3669	1.38	0.00103748
2	5876	1394	2464	2018	8044	1.37	0.000466028
3	2870	580	1317	973	3953	1.38	0.000960162
4	2310	580	922	808	3194	1.38	0.00119765
5	2511	352	1320	839	3480	1.39	0.0011043
6	5573	1461	2180	1932	7606	1.36	0.000489876
7	1906	290	941	675	2630	1.38	0.00144866
8	5525	1470	2144	1911	7535	1.36	0.000493773
9	2088	361	999	728	2891	1.38	0.00132686
10	2617	521	1180	916	3606	1.38	0.00105345
11	5777	1536	2272	1969	7895	1.37	0.000473209
12	2476	467	1153	856	3419	1.38	0.00111584
13	1717	254	873	590	2370	1.38	0.00160876
14	2275	440	1034	801	3137	1.38	0.00121275
15	1423	380	528	515	1961	1.38	0.00193822
16	2467	512	1101	854	3408	1.38	0.00112039
17	2149	528	885	736	2954	1.37	0.00127988
18	5070	1299	2026	1745	6915	1.36	0.000538136
19	5005	1399	1868	1738	6818	1.36	0.00054446
20	5741	1526	2248	1967	7830	1.36	0.000475217
21	5926	1586	2321	2019	8098	1.37	0.000461273
22	1839	294	912	633	2533	1.38	0.00149878
23	5537	1459	2179	1899	7560	1.37	0.000493266
24	2212	411	1021	780	3060	1.38	0.00125135
25	5513	1462	2151	1900	7530	1.37	0.000495596
26	5252	1520	1958	1774	7157	1.36	0.000519032
27	1496	400	556	540	2076	1.39	0.00185646
28	2233	331	1140	762	3072	1.38	0.00123273
29	2823	591	1255	977	3889	1.38	0.000976338
30	2658	553	1196	909	3656	1.38	0.00103536
Bambusa
Iteration	Number of nodes	Number of unique nodes	Number of shared nodes	Number of core nodes	Number of edges	Average degree	Graph density
1	1218	159	658	401	1688	1.39	0.00227753
2	1152	258	500	394	1588	1.38	0.00239526
3	1817	469	702	646	2510	1.38	0.00152136
4	1531	296	718	517	2119	1.38	0.00180923
5	1141	132	622	387	1584	1.39	0.00243554
6	1313	181	693	439	1821	1.39	0.00211418
7	1155	236	507	412	1599	1.38	0.00239933
8	1832	324	856	652	2533	1.38	0.00151026
9	1917	311	936	670	2652	1.38	0.00144406
10	1603	234	826	543	2219	1.38	0.00172819
11	1376	178	741	457	1906	1.39	0.0020148
12	767	93	417	257	1060	1.38	0.00360838
13	1566	269	773	524	2171	1.39	0.00177167
14	1385	199	705	481	1913	1.38	0.00199599
15	1421	204	723	494	1969	1.39	0.00195161
16	1673	421	666	586	2316	1.38	0.00165591
17	1421	358	576	487	1965	1.38	0.00194765
18	1924	412	826	686	2662	1.38	0.00143898
19	1876	334	872	670	2591	1.38	0.00147321
20	1401	182	741	478	1937	1.38	0.00197512
21	1617	416	631	570	2237	1.38	0.00171216
22	1218	293	497	428	1689	1.39	0.00227888
23	1425	212	737	476	1973	1.38	0.00194461
24	1561	255	789	517	2162	1.39	0.00177565
25	1986	372	930	684	2749	1.38	0.00139465
26	1638	304	791	543	2267	1.38	0.0016909
27	1416	221	701	494	1961	1.38	0.00195744
28	1172	156	619	397	1623	1.38	0.00236518
29	1686	305	800	581	2340	1.39	0.00164736
30	1449	215	746	488	2007	1.39	0.00191311
Hyparrhenia
Iteration	Number of nodes	Number of unique nodes	Number of shared nodes	Number of core nodes	Number of edges	Average degree	Graph density
1	3823	558	2051	1214	5314	1.39	0.000727372
2	4206	806	2063	1337	5848	1.39	0.000661305
3	3989	785	1919	1285	5532	1.39	0.000695493
4	4344	842	2127	1375	6039	1.39	0.0006402
5	6109	1297	2891	1921	8478	1.39	0.000454417
6	3995	775	1935	1285	5559	1.39	0.00069679
7	5629	1204	2676	1749	7836	1.39	0.000494697
8	5987	1323	2777	1887	8310	1.39	0.000463751
9	3706	572	1929	1205	5134	1.39	0.000747812
10	5655	1072	2775	1808	7846	1.39	0.000490783
11	5706	1182	2736	1788	7930	1.39	0.00048721
12	4589	883	2275	1431	6376	1.39	0.000605671
13	5906	1303	2680	1923	8215	1.39	0.000471112
14	5882	1487	2536	1859	8158	1.39	0.000471669
15	5064	972	2414	1678	7041	1.39	0.000549241
16	4766	856	2404	1506	6620	1.39	0.000583003
17	4039	594	2122	1323	5626	1.39	0.000689905
18	4339	773	2206	1360	6039	1.39	0.000641676
19	4478	720	2351	1407	6239	1.39	0.000622406
20	4673	855	2381	1437	6524	1.40	0.000597648
21	5612	1274	2572	1766	7801	1.39	0.000495476
22	6211	1436	2821	1954	8644	1.39	0.00044822
23	4615	810	2338	1467	6379	1.38	0.000599147
24	5600	1242	2592	1766	7770	1.39	0.000495624
25	6130	1349	2805	1976	8530	1.39	0.000454076
26	4061	615	2123	1323	5635	1.39	0.000683542
27	3876	927	1674	1275	5361	1.38	0.000713872
28	4853	1094	2235	1524	6739	1.39	0.000572393
29	3794	578	2033	1183	5297	1.40	0.000736173
30	5212	1224	2307	1681	7218	1.38	0.000531522
Andropogon
Iteration	Number of nodes	Number of unique nodes	Number of shared nodes	Number of core nodes	Number of edges	Average degree	Graph density
1	7987	1759	3842	2386	11161	1.40	0.000349961
2	7224	1457	3628	2139	10111	1.40	0.000387551
3	7529	1538	3652	2339	10509	1.40	0.00037083
4	7886	1907	3545	2434	11026	1.40	0.000354641
5	9609	2307	4415	2887	13399	1.39	0.000290263
6	6461	1129	3385	1947	9038	1.40	0.000433082
7	9922	2684	4447	2791	13874	1.40	0.000281888
8	7836	1827	3753	2256	10982	1.40	0.000357749
9	8031	1803	3870	2358	11214	1.40	0.000347781
10	7890	1666	3921	2303	11021	1.40	0.000354121
11	7531	1634	3617	2280	10524	1.40	0.000371162
12	7357	1705	3534	2118	10290	1.40	0.000380279
13	6813	1209	3414	2190	9525	1.40	0.000410471
14	8826	2063	4202	2561	12352	1.40	0.000317167
15	8266	1984	3850	2432	11532	1.40	0.000337595
16	7677	1614	3815	2248	10723	1.40	0.000363932
17	7401	1645	3535	2221	10325	1.40	0.000377049
18	9881	2562	4457	2862	13782	1.39	0.000282348
19	6719	1309	3468	1942	9400	1.40	0.000416498
20	10280	2786	4503	2991	14317	1.39	0.000270981
21	8156	1696	3929	2531	11352	1.39	0.000341351
22	7642	1453	3899	2290	10676	1.40	0.000365663
23	8303	1808	4058	2437	11587	1.40	0.000336189
24	7977	1854	3817	2306	11143	1.40	0.000350274
25	6924	1445	3452	2027	9690	1.40	0.000404299
26	7816	1657	3728	2431	10919	1.40	0.000357519
27	7320	1662	3448	2210	10257	1.40	0.000382902
28	6717	1260	3422	2035	9391	1.40	0.000416347
29	8002	1799	3832	2371	11196	1.40	0.000349744
30	8781	2023	4252	2506	12279	1.40	0.000318533
Schizachyrium
Iteration	Number of nodes	Number of unique nodes	Number of shared nodes	Number of core nodes	Number of edges	Average degree	Graph density
1	7056	1593	3304	2159	9828	1.39	0.000394857
2	8207	1942	3744	2521	11476	1.40	0.000340804
3	6962	1786	2977	2199	9679	1.39	0.000399443
4	6610	1455	2991	2164	9212	1.39	0.000421742
5	5204	958	2531	1715	7255	1.39	0.000535891
6	6250	1439	2842	1969	8694	1.39	0.000445204
7	4921	1284	2028	1609	6839	1.39	0.000564942
8	5922	1157	2903	1862	8278	1.40	0.000472163
9	5805	1273	2703	1829	8078	1.39	0.000479517
10	7292	1578	3444	2270	10186	1.40	0.000383177
11	6027	1390	2662	1975	8386	1.39	0.000461801
12	5895	1162	2863	1870	8218	1.39	0.000473045
13	5302	945	2647	1710	7402	1.40	0.000526722
14	6260	1373	2884	2003	8712	1.39	0.000444701
15	5577	1064	2682	1831	7795	1.40	0.000501329
16	7049	1508	3329	2212	9829	1.39	0.000395682
17	5204	940	2585	1679	7259	1.39	0.000536186
18	6745	1479	3113	2153	9411	1.40	0.000413777
19	7566	1872	3332	2362	10529	1.39	0.00036791
20	7099	1621	3196	2282	9932	1.40	0.000394215
21	8720	2238	3819	2663	12173	1.40	0.000320217
22	6142	1244	2893	2005	8552	1.39	0.00045347
23	7196	1641	3198	2357	10047	1.40	0.000388101
24	6110	1205	3005	1900	8522	1.39	0.000456626
25	4949	853	2442	1654	6899	1.39	0.000563468
26	5079	875	2567	1637	7068	1.39	0.000548095
27	5531	973	2790	1768	7728	1.40	0.000505322
28	5834	1152	2832	1850	8150	1.40	0.000478993
29	5450	847	2857	1746	7622	1.40	0.000513317
30	5667	1043	2898	1726	7919	1.40	0.000493254
